# Supplementary material for: Avian Cone Photoreceptors Tile the Retina as Five Independent, Self-Organizing Mosaics
Source: PLoS One. 2010 Feb 1;5(2):e8992. doi: 10.1371/journal.pone.0008992 (PMC2813877; doi:10.1371/journal.pone.0008992)
Supplement: Table S1 — Data and coordinates for cone mosaics from all four species. This file contains a total of 35 worksheets. ‘Summary’ includes a variety of data about all the P15 chicken mosaics (NND, nearest neighbor distance). Worksheets labeled ‘DN1’ (‘Dorsal-Nasal field #1’), ‘DT1’ (‘Dorsal-Temporal field #1’), ‘VN1’ (‘Ventral-Nasal field #1’), ‘NT1’ (‘Ventral-Temporal field #1’) etc. contain the raw coordinates for all P15 chicken fields examined in the present study. Worksheets labeled ‘E18’, ‘P0’ and ‘P6’ contain the raw coordinates for the chicken mosaics examined at the indicated developmental stages. Worksheets labeled ‘P. pubescens’, ‘P. domesticus’ and ‘C. livia’ contain the raw coordinates for the three additional species examined. (6.86 MB XLS) [file pone.0008992.s004.xls]

## Sheet: Summary
	Cell Count	Density	Mean NND	Standard deviation NND	NND regularity index	Topological disorder (μ2)		Fraction of n-sided polygons in Voronoi tessellation									Effective Radius
DN 1								3	4	5	6	7	8	9	10		Double-Double	Green-Green	Red-Red	Blue-Blue	Violet-Violet	Double-Green	Double-Red	Double-Blue	Double-Violet	Green-Red	Green-Blue	Green-Violet	Red-Blue	Red-Violet	Blue-Violet
Red	675	4815.28	11.5766	1.68101	6.88666	0.642487		0	0.0207254	0.233161	0.512953	0.202073	0.0310881	0	0		5.62006	8.1215	9.11426	10.0526	13.3146	2.48299	2.13329	2.91728	3.45907	2.40433	2.93237	2.93957	3.34731	3.23155	4.30203
Green	887	6327.63	10.0625	1.39143	7.23179	0.775928		0	0.0256082	0.270166	0.455826	0.201024	0.0448143	0.00256082	0
Blue	590	4208.91	12.547	1.7832	7.03626	0.578529		0	0.00994036	0.256461	0.508946	0.208748	0.0139165	0.00198807	0
Violet	350	2496.81	16.6371	2.32386	7.15923	0.630662		0	0.00696864	0.296167	0.442509	0.236934	0.0174216	0	0
Double	1836	13097.6	7.06308	0.991083	7.12662	0.586801		0	0.0112961	0.247325	0.501784	0.222354	0.0166468	0.00059453	0
DN 2
Red	795	5671.33	10.778	1.5017	7.17719	0.675287		0	0.0186782	0.265805	0.468391	0.222701	0.0215517	0.00287356	0		5.28128	7.44205	8.59969	9.6009	12.2514	2.15733	2.52283	3.15119	2.84252	2.23231	2.89357	2.54657	3.09677	2.96258	3.99237
Green	1065	7597.44	9.22905	1.13423	8.13683	0.777778		0	0.0328042	0.25291	0.451852	0.222222	0.0380952	0.0021164	0
Blue	649	4629.8	12.0404	1.66324	7.23913	0.646429		0	0.0214286	0.248214	0.485714	0.225	0.0178571	0.00178571	0
Violet	357	2546.75	15.7605	2.70207	5.83273	0.756098		0	0.0278746	0.275261	0.449477	0.212544	0.0313589	0.00348432	0
Double	2175	15515.9	6.4912	0.884158	7.34167	0.53954		0	0.00950951	0.230731	0.534034	0.210711	0.015015	0	0
DN 3
Red	677	4829.55	11.7972	1.67747	7.03271	0.674699		0	0.0189329	0.26506	0.457831	0.2358	0.020654	0.00172117	0		5.57093	7.97057	9.16732	10.5464	12.9454	1.9589	2.66111	3.33847	3.30035	1.97139	2.48667	2.35376	3.03012	2.76278	4.42872
Green	939	6698.59	9.83981	1.34241	7.32997	0.741505		0	0.026699	0.259709	0.457524	0.218447	0.0364078	0.00121359	0
Blue	564	4023.43	13.1745	1.96426	6.70713	0.596674		0	0.018711	0.239085	0.513514	0.214137	0.012474	0.002079	0
Violet	374	2668.02	16.1373	2.47088	6.531	0.6		0	0.0166667	0.236667	0.52	0.203333	0.0233333	0	0
Double	1894	13511.3	6.90452	0.982601	7.02678	0.521664		0	0.0127094	0.215482	0.556326	0.202195	0.0132871	0	0
DN 4
Red	814	5806.87	10.9268	1.28103	8.52971	0.649718		0	0.0155367	0.259887	0.485876	0.20904	0.029661	0	0		5.91927	7.68019	8.7351	10.7479	11.8291	2.86283	2.95039	3.01225	3.7493	2.56414	2.77443	2.81959	3.04843	3.36376	4.3103
Green	1018	7262.16	9.59569	1.11306	8.62097	0.773731		0	0.0298013	0.266004	0.448124	0.211921	0.0441501	0	0
Blue	538	3837.96	13.4056	1.86836	7.17509	0.625		0	0.0197368	0.247807	0.493421	0.219298	0.0197368	0	0
Violet	446	3181.65	14.6551	2.25703	6.49312	0.586022		0	0.0134409	0.244624	0.526882	0.19086	0.0241935	0	0
Double	1711	12205.8	7.44272	0.943588	7.88768	0.52975		0	0.00895713	0.229047	0.546385	0.200256	0.0147153	0.000639795	0
DN 5
Red	736	5250.44	11.0737	1.68513	6.57142	0.734277		0.00157233	0.0283019	0.245283	0.470126	0.221698	0.0314465	0.00157233	0		5.1582	7.55392	8.7327	8.79765	9.94094	1.54234	2.16487	2.35906	2.96195	2.12601	2.75522	2.31574	2.82144	2.66792	3.43575
Green	1002	7148.02	9.60378	1.16255	8.26093	0.676104		0	0.0169875	0.267271	0.448471	0.244621	0.0215176	0.0011325	0
Blue	805	5742.67	10.8138	1.33027	8.12903	0.571429		0	0.02	0.218571	0.531429	0.215714	0.0142857	0	0
Violet	582	4151.84	12.6675	1.79179	7.06971	0.678068		0	0.0181087	0.273642	0.464789	0.217304	0.0241449	0.00201207	0
Double	2255	16086.6	6.41223	0.836634	7.66433	0.51537		0	0.00912584	0.220461	0.556676	0.198847	0.0148895	0	0
DN 6
Red	653	4658.34	11.925	1.56031	7.64271	0.651865		0	0.0213144	0.248668	0.49556	0.209591	0.0230906	0.0017762	0		6.16765	8.93804	9.5593	10.547	11.3321	2.04892	2.62437	3.08378	3.85533	2.65247	3.12008	2.65493	3.22358	2.96672	3.61642
Green	783	5585.72	10.9388	1.28934	8.48399	0.719118		0	0.0235294	0.254412	0.489706	0.191176	0.0382353	0.00294118	0
Blue	551	3930.7	13.1028	1.70113	7.70241	0.593548		0	0.00645161	0.258065	0.513978	0.195699	0.0236559	0.00215054	0
Violet	452	3224.45	14.3464	2.17889	6.58427	0.609043		0	0.018617	0.239362	0.518617	0.199468	0.0239362	0	0
Double	1529	10907.5	7.85671	1.07496	7.30881	0.496751		0	0.00866426	0.215162	0.566065	0.197834	0.0122744	0	0
DN 7
Red	726	5179.1	11.3762	1.453	7.82948	0.689984		0	0.0143084	0.26868	0.486486	0.193959	0.0317965	0.00476948	0		6.07275	8.63369	9.20265	10.3188	11.3787	2.11465	2.53485	2.70222	3.71894	2.30923	3.04505	2.59813	3.32219	2.85922	3.82755
Green	810	5778.34	10.6162	1.29995	8.16665	0.703235		0	0.0168776	0.2827	0.448664	0.218003	0.0337553	0	0
Blue	552	3937.83	13.0581	1.79068	7.29227	0.594421		0	0.0150215	0.242489	0.521459	0.197425	0.0236052	0	0
Violet	441	3145.98	14.5211	2.31809	6.26425	0.648199		0	0.0193906	0.252078	0.459834	0.252078	0.0166205	0	0
Double	1677	11963.3	7.51384	0.926093	8.11348	0.530105		0	0.0065445	0.240183	0.528796	0.211387	0.013089	0	0
DT 1
Red	686	4893.75	11.9178	1.30165	9.15587	0.687713		0	0.0255973	0.245734	0.481229	0.216724	0.0307167	0	0		7.06175	8.65568	9.81289	10.3102	10.1379	2.17068	2.80124	3.24242	3.95351	2.56101	2.78989	2.34585	3.1241	2.97362	3.27295
Green	806	5749.8	10.8738	1.31648	8.25973	0.635846		0	0.0156472	0.254623	0.487909	0.216216	0.0256046	0	0
Blue	624	4451.46	12.4966	1.28843	9.69914	0.691729		0	0.0281955	0.25188	0.466165	0.229323	0.0244361	0	0
Violet	494	3524.07	13.3802	2.2026	6.07475	0.717391		0	0.0241546	0.272947	0.442029	0.231884	0.0289855	0	0
Double	1292	9216.8	8.61779	1.05074	8.20161	0.568103		0	0.00948276	0.235345	0.546552	0.182759	0.0241379	0.00172414	0
DT 2
Red	873	6227.76	10.4391	1.29099	8.08615	0.712418		0	0.0248366	0.266667	0.453595	0.228758	0.0235294	0.00261438	0		5.82765	7.31941	8.36655	9.20576	9.15055	1.61048	2.40137	2.50162	3.2912	2.03812	2.75721	2.32295	2.53534	2.79213	3.22801
Green	1143	8153.87	9.04173	1.08167	8.35907	0.682261		0	0.0175439	0.268031	0.463938	0.219298	0.0311891	0	0
Blue	695	4957.96	11.6058	1.5648	7.41678	0.590381		0	0.0165837	0.247098	0.499171	0.223881	0.013267	0	0
Violet	642	4579.87	11.7277	1.84584	6.35358	0.662455		0	0.0180505	0.263538	0.481949	0.209386	0.0252708	0.00180505	0
Double	1813	12933.5	7.14457	0.971881	7.35128	0.502709		0	0.0102348	0.214931	0.564118	0.198675	0.0120409	0	0
DT 3
Red	821	5856.81	10.786	1.28752	8.37734	0.682961		0	0.0223464	0.25419	0.47905	0.215084	0.027933	0.00139665	0		6.09908	8.03633	8.665	9.57718	9.52275	1.8819	2.60829	2.52892	3.38686	1.92519	3.01041	2.50503	2.90577	3.04515	3.26626
Green	1001	7140.88	9.80083	1.15256	8.50355	0.71219		0	0.0248307	0.265237	0.44921	0.233634	0.0259594	0.00112867	0
Blue	653	4658.34	12.0522	1.62074	7.43627	0.590747		0	0.019573	0.247331	0.5	0.22242	0.0106762	0	0
Violet	600	4280.25	12.2333	1.95315	6.2634	0.613861		0	0.0138614	0.247525	0.49703	0.221782	0.0178218	0.0019802	0
Double	1639	11692.2	7.54041	1.02834	7.3326	0.462366		0	0.00672043	0.206317	0.590054	0.186156	0.0107527	0	0
DT 4
Red	636	4537.06	12.0803	1.54026	7.84302	0.625688		0	0.0256881	0.229358	0.506422	0.220183	0.0183486	0	0		6.37059	8.48226	9.79814	10.4111	10.6336	1.72252	2.58406	1.88186	2.81653	2.24501	3.10614	3.03347	2.61793	3.14769	3.6191
Green	817	5828.27	10.5751	1.31849	8.02062	0.812676		0	0.0267606	0.278873	0.425352	0.221127	0.0450704	0.0028169	0
Blue	552	3937.83	12.8562	1.71739	7.48588	0.628998		0	0.0191898	0.236674	0.509595	0.211087	0.021322	0.0021322	0
Violet	425	3031.84	14.3734	3.22179	4.46131	0.737892		0	0.037037	0.245014	0.48433	0.196581	0.037037	0	0
Double	1374	9801.77	8.091	1.19197	6.78795	0.582931		0	0.0144928	0.224638	0.553945	0.18438	0.0185185	0.00322061	0.000805153
DT 5
Red	713	5086.36	11.3339	1.55375	7.29455	0.71799		0	0.0275527	0.246353	0.484603	0.204214	0.0356564	0.00162075	0		6.11281	7.67814	9.01799	9.04415	9.59238	1.68426	2.60473	1.84144	3.02705	2.33438	2.88048	2.49086	2.88278	3.34874	3.0054
Green	982	7005.34	9.62557	1.39206	6.91464	0.735023		0	0.016129	0.28341	0.4447	0.211982	0.0437788	0	0
Blue	775	5528.65	10.9836	1.36847	8.02613	0.677037		0	0.0133333	0.28	0.466667	0.21037	0.0266667	0.00296296	0
Violet	537	3830.82	12.5785	2.01894	6.23026	0.724062		0	0.0198675	0.275938	0.439294	0.233996	0.0286976	0.00220751	0
Double	1513	10793.4	7.83103	1.12053	6.98871	0.597222		0	0.0138889	0.240497	0.518275	0.203947	0.0226608	0.000730994	0
DT 6
Red	667	4758.21	11.7635	1.43885	8.17558	0.68007		0	0.0174825	0.27972	0.445804	0.232517	0.0244755	0	0		6.69825	8.70757	9.62287	10.1355	11.5227	2.12437	3.09084	2.90773	4.11538	2.2053	2.97564	2.18451	3.35622	2.70299	3.09266
Green	797	5685.6	10.7054	1.47853	7.24056	0.795094		0	0.024531	0.291486	0.409812	0.235209	0.036075	0.002886	0
Blue	596	4251.71	12.475	1.54791	8.05927	0.80117		0	0.0214425	0.296296	0.417154	0.220273	0.0409357	0.00389864	0
Violet	404	2882.03	14.806	2.26979	6.52308	0.676737		0	0.021148	0.253776	0.483384	0.214502	0.0241692	0.00302115	0
Double	1302	9288.14	8.4671	1.16813	7.24842	0.474894		0	0.0093617	0.212766	0.575319	0.196596	0.00510638	0.000851064	0
DT 7
Red	779	5557.19	11.079	1.30257	8.5055	0.591777		0	0.0161527	0.240822	0.509545	0.215859	0.0176211	0	0		6.72209	8.36062	9.07448	9.65992	10.3365	1.50554	2.15425	1.77985	3.14475	2.25593	3.38454	2.29297	3.45161	3.04706	2.76857
Green	845	6028.02	10.5949	1.34601	7.87129	0.643052		0	0.0190736	0.247956	0.490463	0.219346	0.0217984	0.0013624	0
Blue	679	4843.82	11.7978	1.4326	8.23528	0.687606		0	0.0220713	0.249576	0.49236	0.203735	0.0288625	0.00339559	0
Violet	449	3203.05	13.6794	2.41697	5.65972	0.740642		0	0.0213904	0.264706	0.486631	0.181818	0.040107	0.00534759	0
Double	1290	9202.54	8.34189	1.14676	7.27434	0.626506		0	0.0163511	0.241824	0.519793	0.19105	0.0301205	0.000860585	0
VN 1
Red	793	5657.06	10.8103	1.34924	8.01217	0.710145		0	0.0231884	0.25942	0.462319	0.223188	0.0304348	0.00144928	0		6.23654	8.30743	8.82883	10.0689	14.4777	2.54913	2.72029	3.00935	3.2978	2.58468	3.4852	3.20192	3.49279	2.71715	3.48139
Green	876	6249.16	10.2932	1.25058	8.23073	0.747051		0	0.0249017	0.271298	0.445609	0.218873	0.0393185	0	0
Blue	549	3916.43	12.8482	1.88837	6.80385	0.680258		0	0.0214592	0.253219	0.487124	0.203863	0.0343348	0	0
Violet	243	1733.5	19.0047	3.14084	6.05084	0.723404		0	0.0159574	0.287234	0.452128	0.202128	0.0425532	0	0
Double	1676	11956.2	7.59811	0.974328	7.79831	0.53499		0	0.0137345	0.217789	0.555265	0.196861	0.0163506	0	0
VN 2
Red	651	4644.07	11.8149	1.56297	7.55928	0.744186		0	0.019678	0.284436	0.42576	0.236136	0.0322004	0.00178891	0		6.43465	9.06419	9.47064	13.5436	16.168	0.922963	1.37575	1.84788	2.90953	2.64794	2.96184	2.76601	3.18449	2.98756	5.87009
Green	744	5307.51	11.1585	1.45446	7.6719	0.790123		0	0.0324074	0.266975	0.449074	0.20679	0.0432099	0.00154321	0
Blue	328	2339.87	17.0629	2.43342	7.01189	0.631179		0	0.0342205	0.209125	0.528517	0.209125	0.0190114	0	0
Violet	220	1569.42	20.7981	3.16491	6.57146	0.746988		0	0.0361446	0.259036	0.433735	0.246988	0.0240964	0	0
Double	1518	10829	8.00492	0.980869	8.16105	0.502907		0	0.00726744	0.221657	0.561773	0.196221	0.0123547	0.000726744	0
VN 3
Red	639	4558.47	11.9033	1.45185	8.19875	0.734062		0	0.0163934	0.284153	0.460838	0.193078	0.0437158	0.00182149	0		6.36538	8.61269	9.46284	12.897	16.1962	2.59816	2.58333	2.91732	3.65947	2.86523	3.05542	2.66621	3.2978	3.00827	5.99657
Green	863	6156.42	10.4644	1.14185	9.16437	0.710317		0	0.015873	0.276455	0.452381	0.223545	0.0277778	0.00396825	0
Blue	371	2646.62	16.024	2.14447	7.47223	0.716172		0	0.0330033	0.237624	0.491749	0.20132	0.0363036	0	0
Violet	217	1548.02	20.5962	3.08724	6.67137	0.54321		0	0.0185185	0.234568	0.512346	0.234568	0	0	0
Double	1629	11620.9	7.93118	0.898394	8.82817	0.393122		0	0.00202293	0.192852	0.631153	0.167903	0.00606878	0	0
VN 4
Red	771	5500.12	10.9577	1.54946	7.07195	0.697015		0	0.0298507	0.235821	0.489552	0.214925	0.0283582	0.00149254	0		5.70752	7.59363	8.69657	12.5059	14.9952	1.79935	2.14003	2.06603	2.72616	2.3172	2.92453	2.79361	2.83797	2.70757	5.51557
Green	1032	7362.03	9.55016	1.16021	8.23139	0.784615		0	0.0296703	0.268132	0.436264	0.227473	0.0351648	0.0032967	0
Blue	407	2903.44	15.5821	2.03279	7.66538	0.584337		0	0.0150602	0.256024	0.478916	0.243976	0.0060241	0	0
Violet	257	1833.37	18.8496	2.72568	6.91555	0.665		0	0.015	0.29	0.44	0.235	0.02	0	0
Double	2032	14495.8	6.98957	0.873584	8.00102	0.415905		0	0.00376142	0.195056	0.614186	0.181623	0.00483611	0.000537346	0
VN 5
Red	712	5079.23	11.4557	1.70189	6.73115	0.715447		0	0.0276423	0.242276	0.478049	0.217886	0.0325203	0.00162602	0		5.58815	7.22442	9.00701	11.6497	14.0785	1.75561	2.02595	2.20139	2.78676	1.97691	2.43404	2.19017	3.09514	2.68469	5.29168
Green	1145	8168.14	9.01941	1.09724	8.22006	0.75665		0	0.0344828	0.247291	0.449261	0.236453	0.0315271	0.000985222	0
Blue	486	3467	14.3365	1.89154	7.57929	0.580247		0	0.00987654	0.254321	0.508642	0.207407	0.0197531	0	0
Violet	301	2147.26	17.4479	2.59954	6.71191	0.687764		0	0.0295359	0.227848	0.50211	0.206751	0.0337553	0	0
Double	2262	16136.5	6.68654	0.766661	8.72163	0.452232		0	0.006241	0.201632	0.599616	0.183869	0.00720115	0.00144023	0
VN 6
Red	721	5143.43	11.2099	1.59403	7.03244	0.706452		0	0.0225806	0.26129	0.46129	0.224194	0.0290323	0.0016129	0		5.70194	8.12213	8.92165	12.2416	13.4691	2.66407	3.05327	2.88792	3.17665	2.46997	3.14822	2.64295	3.44303	3.35404	5.11249
Green	896	6391.84	9.98774	1.20572	8.28361	0.775095		0	0.0292249	0.265565	0.445997	0.221093	0.0343075	0.00381194	0
Blue	421	3003.31	15.1365	2.07419	7.29754	0.678063		0	0.017094	0.264957	0.490028	0.193732	0.031339	0.002849	0
Violet	311	2218.6	17.3313	2.63958	6.56594	0.666667		0	0.0200803	0.257028	0.497992	0.196787	0.0240964	0.00401606	0
Double	1819	12976.3	7.22396	0.949294	7.60982	0.43656		0	0.00541191	0.205652	0.592303	0.192423	0.00420926	0	0
VN 7
Red	859	6127.89	10.4856	1.14613	9.14867	0.73386		0	0.0237154	0.268775	0.467721	0.196311	0.0434783	0	0		6.27234	8.40653	8.53349	12.7869	13.6011	2.65643	3.05113	2.86905	3.09105	2.61097	2.61543	2.19828	2.88969	2.74422	5.00948
Green	778	5550.06	10.7231	1.49249	7.18472	0.722552		0	0.0267062	0.261128	0.446588	0.235905	0.0296736	0	0
Blue	383	2732.23	15.8732	2.19691	7.22523	0.677419		0	0.00967742	0.274194	0.467742	0.209677	0.0387097	0	0
Violet	254	1811.97	18.3075	3.64616	5.02102	0.912821		0	0.0410256	0.287179	0.405128	0.210256	0.0512821	0.00512821	0
Double	1739	12405.6	7.66464	0.881306	8.69691	0.429386		0	0.00379987	0.20456	0.593414	0.194427	0.00379987	0	0
VT 1
Red	519	3702.42	13.3992	1.80963	7.40436	0.517007		0	0	0.258503	0.517007	0.213152	0.0113379	0	0		6.86382	9.77634	10.624	12.4925	15.8276	2.14323	2.53644	3.09644	3.63312	1.96833	3.2679	2.95408	3.59572	3.35253	5.26975
Green	650	4636.94	11.9539	1.4474	8.25884	0.653501		0	0.0233393	0.24237	0.491921	0.217235	0.0251346	0	0
Blue	435	3103.18	15.3454	1.83579	8.35903	0.522222		0	0.0138889	0.227778	0.544444	0.205556	0.00833333	0	0
Violet	263	1876.18	19.4243	2.20889	8.79371	0.536585		0	0.00487805	0.263415	0.517073	0.209756	0	0.00487805	0
Double	1406	10030.1	8.31823	1.03589	8.03001	0.488906		0	0.00237718	0.229794	0.558637	0.195721	0.0134707	0	0
VT 2
Red	576	4109.04	12.5705	1.75501	7.16261	0.672802		0	0.0224949	0.255624	0.468303	0.229039	0.0245399	0	0		6.9092	9.72297	9.96933	13.0073	17.4049	1.92421	2.41335	3.04712	3.45639	2.5586	3.50746	2.68634	3.32813	3.12878	5.12929
Green	651	4644.07	11.9362	1.43474	8.31942	0.724199		0	0.0338078	0.247331	0.466192	0.225979	0.024911	0.00177936	0
Blue	349	2489.68	16.5303	2.52087	6.55739	0.640288		0	0.0251799	0.251799	0.456835	0.258993	0.00719424	0	0
Violet	175	1248.41	23.1194	3.33687	6.92849	0.515385		0	0.00769231	0.253846	0.530769	0.2	0.00769231	0	0
Double	1331	9495.02	8.44544	1.14877	7.35172	0.461153		0	0.0075188	0.208855	0.581454	0.195489	0.00668338	0	0
VT 3
Red	716	5107.76	11.1179	1.61778	6.87234	0.642395		0	0.0161812	0.263754	0.477346	0.221683	0.0194175	0.00161812	0		5.76763	7.80968	8.65966	11.4634	14.6096	1.28226	2.37694	2.62401	3.06771	2.09413	2.69851	2.05633	3.20428	2.66046	5.15199
Green	943	6727.12	9.82588	1.28298	7.65865	0.755448		0	0.0266344	0.25908	0.456416	0.217918	0.0375303	0.00242131	0
Blue	445	3174.52	14.5373	2.03243	7.1527	0.655827		0	0.0216802	0.265583	0.474255	0.216802	0.0216802	0	0
Violet	271	1933.25	18.4038	2.60811	7.05636	0.762557		0	0.0365297	0.283105	0.442922	0.205479	0.0319635	0	0
Double	1769	12619.6	7.24649	1.02783	7.05026	0.473978		0	0.00743494	0.210657	0.579926	0.19145	0.0105328	0	0
VT 4
Red	663	4729.68	11.5569	1.53669	7.52066	0.719023		0	0.0226876	0.267016	0.467714	0.205934	0.034904	0.0017452	0		6.07216	8.80139	9.27933	11.8793	13.8028	1.77829	2.35299	2.48705	3.06393	2.37464	3.16959	2.52895	3.21837	2.91754	4.94508
Green	753	5371.71	10.8507	1.47208	7.37104	0.722983		0	0.0258752	0.267884	0.445967	0.229833	0.0304414	0	0
Blue	431	3074.65	14.9846	2.07719	7.21387	0.663842		0	0.019774	0.262712	0.454802	0.242938	0.019774	0	0
Violet	277	1976.05	17.9881	3.03298	5.93085	0.827273		0	0.0454545	0.263636	0.413636	0.25	0.0227273	0.00454545	0
Double	1614	11513.9	7.73098	0.987874	7.82587	0.463581		0	0.00816882	0.207624	0.581348	0.196052	0.00680735	0	0
VT 5
Red	546	3895.03	12.9446	1.74409	7.42201	0.658798		0	0.0214592	0.246781	0.5	0.203863	0.0257511	0.00214592	0		6.53143	9.11274	10.2388	12.9755	15.9142	2.27889	2.64484	2.72272	3.34537	2.33077	3.51007	2.83674	3.31252	3.54399	3.49873
Green	737	5257.57	11.0782	1.35013	8.20531	0.748437		0	0.028125	0.260937	0.460938	0.210938	0.0375	0.0015625	0
Blue	367	2618.09	16.2966	2.43574	6.69061	0.543624		0	0.0167785	0.218121	0.567114	0.177852	0.0201342	0	0
Violet	231	1647.9	20.3206	3.52298	5.76802	0.55		0	0.0111111	0.261111	0.516667	0.2	0.0111111	0	0
Double	1542	11000.2	8.08066	0.952586	8.48286	0.422143		0	0.00428571	0.198571	0.614286	0.175	0.00785714	0	0
VT 6
Red	695	4957.96	11.4302	1.58586	7.20755	0.723618		0	0.0268007	0.252931	0.469012	0.21943	0.0284757	0.00335008	0		5.99637	8.15883	9.10683	11.9942	14.8262	1.88139	2.52109	2.67144	3.05163	2.54812	3.2061	2.68428	3.00733	2.79853	4.73317
Green	880	6277.7	10.1764	1.27009	8.01233	0.744488		0	0.0259403	0.267185	0.435798	0.241245	0.0272374	0.00259403	0
Blue	445	3174.52	14.9317	1.89493	7.87982	0.594521		0	0.0164384	0.238356	0.50411	0.224658	0.0164384	0	0
Violet	268	1911.84	18.7777	2.7922	6.72506	0.669811		0	0.0141509	0.278302	0.495283	0.179245	0.0283019	0.00471698	0
Double	1838	13111.8	7.42146	0.877766	8.45493	0.398927		0	0.00417412	0.187835	0.627907	0.175313	0.00477042	0	0
VT 7
Red	817	5828.27	10.6161	1.33179	7.97131	0.711674		0	0.0196906	0.274262	0.438819	0.244726	0.0196906	0.00140647	0.00140647		5.74723	8.1607	8.62386	11.1181	14.6423	2.38773	2.6163	2.84165	3.26358	2.64252	2.68366	2.64669	3.15072	2.44076	4.28535
Green	917	6541.65	10.0134	1.17937	8.49048	0.740695		0	0.0272953	0.263027	0.44665	0.23201	0.028536	0.00248139	0
Blue	467	3331.46	14.4311	2.08537	6.92015	0.697436		0	0.0179487	0.276923	0.453846	0.223077	0.025641	0.0025641	0
Violet	243	1733.5	19.3529	3.24927	5.95608	0.772973		0	0.0324324	0.259459	0.448649	0.227027	0.027027	0.00540541	0
Double	1911	13632.6	7.25861	0.870074	8.34252	0.426766		0	0.00516944	0.193567	0.612866	0.180356	0.00804136	0	0

## Sheet: DN1
Red		Green		Blue		Violet		Double
X	Y	X	Y	X	Y	X	Y	X	Y
34.9842	0.45731	20.8076	0.777427	59.3131	1.00608	262.816	0.868889	102.209	0.503041
204.783	0.548772	97.5442	0.731696	383.455	0.503041	290.3	0.777427	375.635	1.00608
234.966	0.91462	117.346	0.731696	1.3262	1.41766	142.635	1.55485	429.094	0.548772
296.245	0.548772	230.301	1.00608	87.895	1.41766	238.853	4.07006	343.348	1.23474
77.3311	1.23474	285.133	1.3262	196.003	1.41766	167.924	5.03041	135.547	1.3262
18.1552	2.78959	131.934	1.73778	26.2039	2.14936	206.887	6.4938	409.201	2.0579
106.553	3.01825	331.916	2.14936	400.284	2.37801	61.5539	8.09439	421.137	2.0579
285.041	4.07006	6.08222	2.60667	360.086	3.42983	108.154	8.82608	255.682	2.37801
373.714	4.07006	365.985	3.01825	47.0572	4.16152	186.765	8.82608	212.512	2.46947
217.68	4.39018	33.2922	3.42983	135.135	5.57918	226.78	9.1462	368.775	2.46947
142.772	5.44199	275.392	3.65848	427.402	5.67065	36.036	9.2834	269.036	2.60667
417.433	5.44199	163.168	4.48164	173.138	6.08222	6.95111	12.759	280.057	2.69813
159.784	6.08222	399.46	5.67065	347.922	6.95111	352.449	14.3595	174.418	3.10971
307.998	6.17369	410.802	5.67065	325.971	7.77427	424.658	14.8626	10.6553	3.2469
89.7242	6.31088	343.257	5.85357	281.2	8.32304	373.531	15.1827	37.5452	3.42983
269.676	6.95111	259.706	6.08222	252.755	8.41451	397.677	15.2742	220.972	3.42983
362.921	6.95111	221.933	6.72246	78.2915	8.73462	91.1876	18.2467	393.332	3.56702
391.823	7.13404	182.009	7.59135	119.266	8.82608	132.391	18.5668	64.6179	3.65848
339.004	8.32304	382.311	7.59135	238.35	9.05474	162.528	19.7558	155.577	3.65848
400.924	8.64316	198.427	8.00293	154.068	10.0151	308.41	20.2588	319.202	3.74994
43.5817	9.37486	58.0784	8.73462	98.8247	10.1066	289.249	22.5911	184.159	3.8414
193.442	10.1066	313.715	8.73462	16.8747	10.5181	35.533	23.963	120.09	4.29871
171.446	10.3352	430.054	9.05474	295.377	11.2956	247.222	24.8319	301.23	4.39018
350.254	10.4267	212.603	9.2834	385.787	11.387	266.292	24.9234	385.787	4.39018
26.8441	10.6553	126.126	9.37486	202.68	11.7986	215.485	25.0149	247.542	4.71029
260.484	10.8382	74.6787	11.387	271.048	12.1187	330.955	25.9752	52.7736	4.80176
132.894	11.8901	418.53	12.0273	31.6916	12.8504	54.3742	27.1642	351.077	4.80176
61.7826	12.3474	105.913	12.2102	409.43	13.9022	409.11	28.216	335.849	4.93895
429.963	12.4388	361.138	12.3474	313.715	14.8626	0.548772	29.588	112.91	5.03041
327.708	12.759	90.1358	12.6675	191.75	15.1827	200.851	30.8684	92.3766	5.25907
235.789	13.0791	240.225	13.3077	222.664	15.4114	78.6116	31.28	82.1786	5.35053
215.576	13.1705	390.36	13.3077	393.653	16.6918	390.04	32.3318	147.528	5.35053
180.455	13.7193	22.7283	13.4906	51.3102	17.4235	178.763	33.2922	312.526	5.35053
247.542	13.9022	298.486	13.7193	68.8709	18.1552	150.684	33.9324	200.988	5.67065
13.0791	14.8626	174.098	13.8108	423.058	18.4753	18.5668	34.9842	128.87	6.08222
383.043	15.1827	288.517	14.0394	368.135	19.6186	98.2759	34.9842	99.1448	6.31088
286.825	16.6918	44.9536	14.2223	341.748	20.579	370.01	35.2129	72.6666	6.40234
122.01	17.515	144.876	15.7315	165.912	20.7161	348.836	35.8531	294.645	6.4938
81.3555	17.8351	252.298	15.8229	7.36269	20.8076	120.73	38.7799	404.216	6.631
317.968	17.9266	378.378	16.143	111.218	20.8076	306.626	39.7402	431.289	7.13404
202.68	19.1156	155.028	16.2345	258.975	21.9509	327.16	41.661	190.927	7.27123
152.376	19.6186	31.6916	16.5546	25.0149	22.1795	54.4656	44.1762	21.6308	7.59135
174.601	21.6308	184.159	17.2863	140.211	22.271	266.932	44.3133	231.902	8.09439
413.866	21.768	7.86573	17.7436	184.479	22.4997	232.817	44.9536	2.37801	8.32304
275.712	22.0881	403.988	17.8351	241.094	22.9112	288.105	45.2737	12.0273	8.73462
107.697	22.4082	278.227	18.0637	126.126	23.2314	420.862	45.5938	29.9995	8.73462
91.9193	22.4997	335.62	18.1552	351.946	23.3228	406.229	47.0572	371.93	9.78644
360.177	22.4997	353.821	18.3839	208.808	24.9234	35.0757	47.7889	46.9657	10.0151
222.664	23.6429	323.044	19.0241	294.005	24.9234	195.774	48.9779	289.386	10.0151
345.452	23.963	266.703	19.207	86.4316	25.0149	383.134	49.298	164.54	10.5181
394.156	23.963	214.524	19.5271	152.056	26.1124	96.4924	49.5724	264.051	10.5181
66.9502	24.1002	115.105	19.7558	380.07	26.1124	167.924	50.2126	331.184	10.6553
304.065	24.2832	128.55	20.2588	318.242	26.4325	252.527	50.2126	175.881	10.7468
50.0297	24.4204	195.363	20.579	401.381	27.3471	77.4226	51.5846	413.866	10.8382
239.082	25.6551	72.5751	20.8991	278.136	27.6673	363.058	51.7218	138.839	10.9754
193.991	26.1124	418.073	21.8594	303.425	30.2282	146.659	52.362	300.681	11.0669
372.25	26.1124	102.849	23.46	99.2363	30.3197	220.332	54.5571	245.85	11.1584
123.154	26.2039	62.2856	23.7801	227.42	30.5483	13.4906	56.1577	356.565	11.1584
258.334	26.9356	41.9811	23.963	114.373	32.2404	344.309	57.6211	421.045	11.1584
32.6519	27.1642	310.651	24.1002	169.433	32.3318	323.867	59.6332	218.457	11.387
420.634	28.5362	171.125	24.7405	35.7159	32.8806	305.254	60.0905	275.712	12.2102
135.227	29.4965	205.104	25.1521	266.703	33.2007	242.237	60.5936	343.44	12.2102
327.388	30.1367	232.314	25.335	51.4017	33.2922	116.294	61.0052	378.516	12.2102
8.32304	30.8684	15.5943	25.7923	419.994	33.5208	184.479	61.6454	392.875	12.3474
23.46	32.4233	161.705	25.7923	69.3739	34.0239	158.001	62.6058	318.882	12.8504
45.045	33.6123	384.415	26.4325	7.59135	34.5726	63.1545	62.7429	403.393	12.9876
285.133	33.7038	425.298	26.9356	337.129	34.8928	273.38	65.0295	307.678	13.0791
62.5143	33.8409	369.186	27.2557	191.887	35.2129	374.034	65.2582	67.3618	13.3077
158.641	34.0239	390.68	27.4843	429.323	37.408	401.564	65.8069	93.7486	13.3992
91.3248	34.5726	284.721	27.6673	206.155	37.7281	41.5695	68.6422	115.974	13.3992
187.543	34.7556	252.298	28.1246	84.7396	38.4598	136.095	68.9624	184.022	13.3992
363.47	34.9842	25.6551	28.3075	254.127	38.4598	345.589	71.2946	253.899	13.3992
396.808	34.9842	322.587	28.3075	138.748	39.2372	199.479	71.3861	365.254	13.3992
318.882	36.036	343.44	28.6276	292.77	39.7402	84.9682	72.5751	148.489	13.4906
386.839	36.036	139.8	28.7191	376.046	39.7402	218.96	72.9867	208.259	13.5821
215.988	36.2647	85.7914	28.8563	354.553	40.3805	104.13	74.9989	82.7274	14.1309
410.344	36.5848	71.6148	29.588	407.921	40.7006	10.5181	76.1879	281.017	14.451
298.486	36.6763	195.271	30.4569	389.079	41.0207	68.7337	77.7427	36.6763	14.5425
269.584	38.0482	412.677	30.4569	178.214	42.6213	237.938	78.2915	110.578	14.7711
235.698	39.3287	238.853	30.5483	155.988	42.7128	262.267	78.7945	229.432	14.7711
78.2915	39.6488	261.627	31.6916	241.094	43.4445	296.337	79.1146	158.641	14.8626
37.9567	41.4323	184.342	31.9202	280.24	43.4445	387.616	79.2518	337.952	15.2742
252.207	41.4323	401.793	32.1489	222.481	43.5817	27.3471	79.7549	53.9169	15.4114
103.901	41.5695	3.56702	32.2404	312.846	43.7646	317.739	80.3037	136.827	15.7315
203.412	41.5695	358.577	32.6519	27.4843	43.856	170.394	80.7152	126.538	16.143
173.549	41.661	297.709	34.0239	67.1789	45.2737	405.497	82.3158	198.747	16.4632
135.135	42.6213	223.213	34.1611	100.288	45.5938	146.888	84.5109	76.3708	17.0119
147.3	43.0329	309.142	34.344	129.83	46.1883	343.028	84.6481	17.0119	17.6064
333.836	43.0329	374.263	34.5726	190.698	47.0572	425.161	84.7396	102.209	17.7436
11.4785	43.1243	110.486	34.6641	50.67	47.1487	356.885	84.9682	168.061	17.7436
116.797	43.353	124.434	34.8928	397.22	48.8407	125.806	85.6999	241.323	17.8351
345.681	44.1762	154.617	35.2129	339.964	49.298	53.8254	89.4956	1.64632	17.9266
417.433	44.8164	55.8376	36.5848	112.91	49.8925	278.776	90.0444	25.1521	18.2467
379.43	46.0054	32.8806	36.7677	15.8229	50.2126	220.881	92.148	359.537	18.4753
279.005	46.8286	170.165	37.3165	352.357	51.4017	290.209	93.6114	428.362	18.5668
225.545	48.109	424.978	38.2769	297.389	52.1334	112.681	93.7486	270.545	18.8869
360.818	48.5206	90.7761	38.597	262.359	52.7736	8.73462	93.84	416.198	18.8869
63.9777	48.6578	278.227	38.6884	330.635	53.0937	194.403	95.7607	328.532	19.4357
89.084	49.1608	339.644	38.6884	374.674	53.4138	380.619	95.7607	176.613	19.5271
306.398	49.7096	288.105	38.9171	250.194	53.5053	137.788	96.4924	260.895	19.6186
204.783	50.0297	17.515	39.3287	174.281	53.5967	410.482	96.5839	387.067	19.6186
182.97	50.3498	321.032	39.4201	214.524	54.0541	167.65	98.8247	294.142	19.7558
244.066	50.4413	415.878	39.5573	149.312	54.5571	333.425	99.968	397.037	19.8473
291.489	50.67	144.007	39.7402	134.815	54.6943	307.358	100.608	408.972	20.1674
158.001	51.9047	72.6666	40.1518	419.033	55.2888	355.742	102.529	156.309	20.2588
394.293	51.9047	243.838	40.1518	92.7882	56.5693	97.0412	103.261	84.0993	20.4875
52.5449	52.1334	398.088	41.3408	279.737	56.5693	67.0417	105.822	232.085	20.4875
423.058	52.2248	216.765	42.164	410.024	57.9412	43.6731	106.004	205.104	20.7161
270.316	52.362	187.863	42.4841	232.314	59.3131	28.5362	108.154	345.361	20.7161
25.1521	52.6821	47.4688	42.6213	42.8042	60.5021	210.408	109.297	95.8522	20.8076
124.663	53.7339	207.939	42.9414	75.0903	60.5936	184.25	109.709	43.353	20.8991
406	54.7858	261.536	43.353	202.771	60.8222	277.953	109.709	303.562	20.8991
319.02	55.6089	362.007	44.3133	311.703	61.0052	386.015	109.709	64.435	20.9905
331.687	56.2491	5.44199	44.8164	391.503	61.1424	426.259	110.578	144.327	21.1277
106.553	56.7065	387.159	45.1365	25.8838	61.3253	235.286	111.538	217.268	21.1277
1.64632	57.4381	350.757	45.3652	165.821	62.6058	255.499	113.23	225.865	21.4478
361.138	57.9412	403.256	46.5084	122.01	62.8344	119.358	113.87	188.686	21.768
254.31	59.3131	425.939	46.6456	190.515	64.435	98.4131	114.785	379.339	21.8594
175.241	59.6332	303.883	47.6974	292.77	64.8466	366.626	116.477	313.166	22.1795
199.067	59.8619	125.897	48.2005	9.46632	65.2582	319.98	117.986	372.982	22.1795
145.379	59.9534	272.42	48.3377	109.389	65.4868	410.024	118.306	251.978	22.4997
86.3401	60.182	19.9387	48.5206	58.5814	65.6697	390.131	118.489	10.5181	22.5911
346.321	60.2735	82.1786	49.1608	342.068	65.8984	11.7986	118.626	55.7461	22.5911
237.298	61.0052	327.8	49.298	361.046	66.2185	336.489	118.809	118.809	23.3228
213.061	61.6454	372.342	49.481	245.85	67.9106	147.528	119.266	282.389	23.7801
379.979	61.8741	178.763	49.5724	260.484	68.8709	298.486	119.77	385.924	24.1002
264.508	62.2856	233.594	49.8925	385.055	68.8709	53.3224	121.69	404.445	24.2832
32.1489	62.5143	141.675	50.4413	153.656	70.2428	200.53	124.022	29.3593	24.4204
302.053	62.9259	153.885	50.8529	415.146	70.5629	80.4866	125.394	422.737	24.6033
414.597	63.4746	93.337	51.0815	173.046	70.7459	26.1124	128.458	134.495	25.335
18.2467	64.8466	117.117	51.4017	273.289	71.5233	231.582	128.687	364.751	25.335
317.831	65.1667	41.4323	51.9047	325.147	71.6148	273.151	129.739	324.919	25.4722
73.6269	65.8069	106.462	52.0419	214.753	72.0263	351.946	130.15	4.93895	25.5636
283.121	65.8069	246.399	52.4535	126.675	72.8952	120.959	131.111	197.695	25.5636
55.2888	66.4472	209.631	52.5449	231.033	72.8952	137.467	132.391	415.969	25.6551
165.409	67.0417	288.608	52.5449	140.12	74.0385	98.7333	133.032	77.6513	26.1124
424.247	67.0417	31.9202	52.6821	397.86	74.2672	395.116	133.352	335.528	26.1124
338.821	67.499	67.9106	53.0022	39.5573	74.6787	245.667	133.855	178.442	26.2953
230.393	68.002	340.605	53.5053	97.6357	74.6787	367.403	134.266	355.01	26.8441
395.436	68.5508	166.049	53.5967	308.227	74.9074	302.282	134.815	112.361	27.2557
129.099	69.0538	384.552	53.7339	205.012	75.6391	163.626	135.135	19.5271	27.3471
114.693	69.5111	415.009	53.7339	76.0507	75.8677	415.009	135.958	272.237	27.4843
90.5474	69.6941	314.995	54.1455	20.9905	76.1879	324.599	136.187	164.449	27.9874
349.934	70.5629	57.301	54.6943	336.031	76.2793	211.049	138.519	72.4379	28.1246
243.518	70.7459	364.842	56.0662	186.491	76.6909	183.061	138.748	62.2856	28.5362
190.927	71.8434	223.533	56.2491	286.185	77.8799	63.246	139.068	127.91	28.9477
5.12187	72.255	196.003	56.7979	370.65	78.1543	280.88	140.12	288.197	28.9477
378.836	72.8952	300.27	57.4381	250.926	79.3433	38.6884	141.675	430.146	29.0392
146.888	73.6269	398.912	57.7583	58.0784	80.1665	11.4785	141.903	264.371	29.1764
299.127	73.6269	262.039	58.1698	159.373	80.4866	428.454	144.876	308.959	29.3593
365.711	74.9074	272.328	59.9534	350.986	80.4866	258.472	145.287	47.606	29.9995
406.32	75.0903	428.591	60.2735	268.395	81.3555	336.809	147.391	374.491	29.9995
33.7038	75.4104	20.579	60.5936	0.548772	82.1786	378.698	149.54	213.381	30.1367
50.3498	75.5476	180.958	61.0052	413.546	84.6481	82.4073	149.723	297.389	30.1367
179.814	75.8677	283.029	61.4625	113.55	85.0597	318.471	150.775	37.7281	30.2282
267.023	76.2793	418.073	61.8741	34.8928	85.7914	107.605	151.095	105.501	30.2282
209.448	76.3708	142.223	62.2856	141.492	86.6603	238.03	151.324	154.799	30.2282
221.521	77.3311	171.857	62.2856	390.04	86.9804	132.391	151.735	349.476	30.2282
323.958	77.7427	351.489	62.6058	206.796	87.3005	302.373	151.873	92.0565	30.3197
98.5046	78.383	196.003	63.4746	226.917	87.4834	398.591	152.376	172.406	30.4569
422.966	79.6634	81.9957	63.7948	243.335	88.3523	361.229	152.696	232.222	30.5483
256.231	79.9835	252.207	63.7948	323.958	88.5352	22.4997	152.787	395.665	30.6398
280.788	81.3555	210.271	64.435	90.1358	89.4956	222.984	153.016	145.608	30.8684
236.338	82.4073	238.533	64.6179	289.249	89.4956	287.968	153.885	187.954	30.8684
79.7549	82.6359	382.951	64.6179	308.318	89.587	54.8772	154.068	361.458	30.8684
191.567	82.6359	314.675	64.938	15.9144	89.8157	174.51	154.388	314.126	31.0514
108.017	83.2762	335.62	65.8069	102.209	89.8157	193.259	154.617	221.292	31.1885
336.031	83.2762	68.4593	66.8587	188.503	90.1358	389.491	157.909	425.298	31.8288
296.474	84.0079	93.1998	67.1789	365.391	90.8675	152.467	158.412	119.998	32.0117
133.535	84.4194	104.77	67.2703	177.07	91.0962	412.494	159.693	13.1705	32.1489
394.704	84.4194	132.803	67.2703	400.741	91.4163	348.242	160.104	333.196	32.1489
308.959	84.7396	47.0572	67.499	424.567	92.3766	269.584	162.345	247.039	32.3318
16.5546	85.0597	404.948	67.9106	130.699	93.1998	5.67065	164.357	406.64	32.8806
374.263	85.3798	371.519	68.1392	338.913	93.337	71.5233	165.912	56.4778	33.3836
162.025	85.6085	391.96	68.3221	376.503	93.337	212.192	167.101	256.46	33.3836
122.422	87.392	118.077	68.5508	353.318	94.8004	94.2516	168.153	384.003	33.3836
212.1	87.895	297.206	68.7337	160.836	94.8918	333.836	168.153	205.744	33.5208
48.8407	88.1237	5.12187	68.8709	265.331	95.3034	256.963	168.244	27.6673	33.7038
328.532	89.587	31.28	69.8313	72.0263	95.7607	132.711	168.565	84.328	34.4355
230.804	89.7242	225.088	70.1514	4.07006	96.1723	192.39	169.616	279.005	34.4355
68.4593	89.8157	162.528	70.3343	203.183	97.6357	115.242	169.845	341.336	34.4355
345.04	90.0444	76.7824	71.3861	319.523	98.9162	292.13	171.354	271.688	34.6641
3.10971	90.5474	185.622	71.7062	34.9842	99.4649	314.675	172.406	138.108	35.2129
97.0412	90.8675	269.584	71.9349	238.35	101.157	372.662	173.778	291.169	35.3958
406	91.0962	249.143	72.0263	278.136	101.34	236.018	174.601	238.853	36.036
274.432	91.1876	58.3985	72.255	55.7461	101.477	59.7704	175.058	377.418	36.036
198.427	91.7364	359.217	72.5751	182.33	103.032	158.641	175.058	164.54	36.2647
245.758	92.6968	328.943	73.3068	371.839	103.261	390.04	175.058	76.9196	36.3562
31.5087	93.0169	412.814	73.7184	194.951	103.489	176.202	176.75	413.225	36.3562
148.031	93.6114	176.202	73.947	385.375	103.581	409.201	177.482	303.425	36.5848
256.963	94.7089	235.789	74.7702	411.625	103.809	354.461	180.866	353.638	36.6763
363.241	94.8004	16.6918	74.9074	107.056	104.541	280.697	181.598	130.562	36.9049
171.446	95.212	422.737	75.319	83.6877	104.633	11.1584	182.467	325.376	36.9049
420.862	95.212	115.242	76.1879	396.808	104.633	259.615	182.97	400.924	37.0878
388.348	95.7607	315.087	76.3708	136.507	105.364	101.797	183.519	39.5573	37.225
375.314	96.4924	289.386	76.4622	256.963	106.142	218	184.022	227.969	37.5452
20.7161	97.1327	344.858	76.6909	297.938	107.285	371.427	186.994	391.503	37.8653
301.23	97.8644	148.351	77.1025	23.0027	107.697	197.146	187.954	105.913	38.1397
229.753	98.2759	379.979	78.1543	162.985	108.154	71.066	188.686	246.079	38.4598
351.626	98.4131	395.207	78.1543	121.279	108.337	124.983	190.287	199.936	38.597
123.062	98.8247	134.175	78.9317	327.388	108.657	336.489	190.515	219.92	38.6884
185.714	99.4649	40.9293	79.0232	314.035	109.068	244.249	191.75	312.251	38.6884
67.3618	99.6479	93.6114	80.3951	267.892	109.846	306.535	191.887	47.606	39.0086
211.049	99.968	198.427	80.9439	341.656	110.029	398.729	192.07	175.561	39.0086
114.602	100.105	228.701	81.0354	355.833	110.349	86.6603	192.71	11.8901	39.1
140.44	100.425	331.093	81.0354	150.684	111.538	29.588	193.259	149.083	39.5573
40.6091	101.477	214.844	81.4469	414.277	111.538	48.3377	193.351	113.642	39.6488
336.031	101.797	307.038	81.9957	206.476	113.093	421.274	193.442	331.596	39.6488
274.981	102.849	5.44199	82.4987	218.32	113.87	180.455	193.762	67.1789	39.7402
221.384	103.352	32.0117	82.9561	64.8466	114.282	142.223	194.631	183.701	40.1518
80.075	103.581	83.5963	82.9561	8.18585	114.373	159.693	194.951	260.895	40.1518
321.763	103.581	370.01	83.2762	77.5598	115.242	319.523	195.774	282.709	40.1518
200.027	103.992	398.271	83.8707	31.9202	115.425	287.557	196.735	20.8991	40.3805
287.877	104.13	105.273	84.0079	242.466	115.745	7.36269	199.616	419.353	40.4719
5.25907	104.633	260.164	84.1908	44.6335	116.202	226.369	199.936	367.723	40.6091
242.694	104.861	59.7704	84.9682	285.544	116.385	382.22	200.53	346.092	40.7921
56.7979	104.953	174.601	84.9682	397.357	116.477	273.609	200.668	211.049	41.0207
262.176	105.501	187.726	85.4713	384.003	118.169	256.002	204.372	158.184	41.2494
155.577	106.142	247.45	85.6999	188.915	118.626	345.04	205.332	360.086	41.661
363.699	106.645	313.166	85.7914	142.955	120.181	208.076	205.744	95.5321	41.9811
423.058	107.285	409.293	85.7914	173.046	120.821	363.379	206.155	193.762	41.9811
395.528	108.474	281.977	86.1115	269.676	121.462	190.058	206.476	62.4228	42.3012
302.191	108.886	70.6544	86.3401	234.234	122.422	238.213	206.476	2.28655	42.7128
99.2363	108.977	384.964	86.3401	130.699	122.513	65.8069	208.396	298.486	42.8042
405.497	108.977	292.953	86.7517	252.527	122.651	120.501	209.631	108.337	43.353
128.55	109.709	270.636	86.8432	324.507	123.291	102.209	210.271	165.821	43.353
175.15	110.029	24.1002	87.1633	306.306	123.611	298.578	210.911	31.1885	43.4445
31.9202	110.257	157.589	87.4834	84.9682	123.885	412.905	211.369	382.723	43.5817
20.0759	110.898	350.665	89.3127	344.537	124.205	43.0329	211.46	427.173	43.7646
382.311	111.081	143.504	90.0444	157.681	124.526	141.995	211.643	16.5546	43.9932
141.172	111.538	335.711	90.6846	358.257	124.754	312.983	212.741	401.564	44.0847
370.01	112.178	124.983	91.4163	98.5046	125.623	394.384	215.073	88.4438	44.3133
251.063	112.27	360.726	91.4163	424.43	126.218	159.601	217.085	412.905	44.8164
346.229	112.361	134.266	92.4681	43.6731	127.498	84.0079	218	273.7	45.2737
318.562	112.453	372.022	92.4681	218.777	127.498	269.676	218.457	393.104	45.2737
192.39	114.053	108.474	92.7882	410.893	128.047	178.625	218.64	307.267	45.6853
229.753	115.013	46.1883	93.0169	114.282	128.458	332.327	219.372	81.0354	45.8682
89.084	115.745	203	93.1083	202.863	129.007	20.8991	219.6	339.644	45.8682
108.565	115.745	429.826	93.1083	299.538	129.602	285.865	220.332	321.672	46.0969
332.144	115.745	417.25	93.4285	372.159	130.059	262.496	221.064	151.644	46.1883
67.3618	116.934	229.112	93.6114	284.721	130.562	431.061	222.664	374.263	46.1883
209.219	117.346	397.037	93.7486	13.1705	130.791	218.228	223.213	140.852	46.417
49.1608	117.895	85.7914	94.5717	386.656	131.751	108.337	224.265	228.381	46.5084
431.381	118.489	301.733	94.5717	334.019	134.175	204.052	224.356	71.9349	46.6456
158.092	119.678	316.55	95.3034	81.767	134.586	242.694	224.356	257.1	47.0572
310.239	119.907	58.3985	96.1723	252.207	135.044	350.117	225.088	354.553	47.3773
418.53	119.907	150.775	96.5839	170.714	135.135	370.878	225.225	200.668	47.4688
356.702	119.998	76.4622	96.904	314.264	135.227	125.806	226.597	247.222	48.109
263.319	120.318	214.296	97.0412	188.778	136.095	412.905	227.1	367.403	48.109
279.188	120.318	328.532	97.0412	32.0117	136.187	68.8709	228.198	216.948	48.3377
222.253	120.41	175.47	97.3156	406.777	136.187	50.9901	229.753	208.808	48.4291
292.13	120.959	283.121	97.4528	234.006	137.239	311.154	232.222	182.238	48.5206
19.2985	121.37	239.493	97.9558	269.356	137.467	166.461	233.137	171.949	48.6578
242.466	121.919	257.191	98.1845	71.6148	137.65	148.58	233.457	26.524	48.8407
169.342	122.01	99.7851	98.5046	355.01	138.291	328.532	233.457	282.892	48.8407
372.022	123.062	190.927	98.8247	147.3	140.303	258.975	233.594	296.017	48.9779
391.64	123.154	12.5303	99.4649	131.431	140.76	292.313	235.286	104.633	49.1608
103.261	123.702	265.423	99.4649	94.8004	141.172	240.865	237.39	332.967	49.1608
180.226	124.022	402.936	100.288	396.168	141.263	189.418	237.481	44.7249	49.481
30.7312	124.343	343.44	100.517	328.532	142.452	274.523	238.762	159.464	49.7096
137.65	126.126	1.3262	100.745	54.5571	142.635	20.8991	239.082	266.932	49.8925
402.204	126.126	120.638	101.66	422.966	142.772	86.7517	240.454	119.129	50.1212
322.587	126.858	360.406	101.98	247.862	142.955	221.521	240.865	315.315	50.1212
207.756	128.367	29.8166	102.117	23.6429	143.275	5.12187	242.694	134.586	50.3498
308.41	128.779	380.848	102.3	165.18	143.367	101.34	243.106	1.09754	50.67
338.913	128.779	421.594	102.437	377.006	143.504	368.455	243.106	238.121	50.7614
294.645	129.007	292.45	102.529	118.306	144.144	405.177	243.929	417.158	50.7614
126.538	129.099	310.742	103.901	201.719	144.327	38.2769	247.13	9.69497	50.9901
8.96328	129.327	131.202	104.45	0.868889	144.556	385.375	247.45	347.144	51.4931
257.603	129.327	246.17	105.181	218.137	144.876	121.279	247.679	55.929	51.8132
62.5143	129.83	158.824	105.273	266.292	145.699	348.562	248.731	409.704	51.9047
78.4744	130.791	229.981	105.684	293.822	145.836	66.2185	250.423	427.311	52.1334
235.057	130.791	215.073	105.822	309.142	146.339	136.278	251.475	400.832	52.7736
150.364	132.483	63.8862	106.004	412.814	147.848	325.147	251.658	301.002	53.0937
379.339	132.574	94.3888	106.325	343.028	148.58	306.809	251.886	388.119	53.1852
275.301	132.803	412.814	106.553	184.57	148.763	199.067	252.527	189.326	53.3224
425.801	132.803	274.843	106.736	367.403	149.861	173.641	254.95	129.099	53.5053
46.0969	133.032	368.135	106.965	277.816	150.912	156.629	255.591	226.597	53.5053
356.702	133.443	336.169	108.337	40.6091	151.644	250.514	257.1	324.279	53.9169
94.2516	133.763	52.362	108.474	211.963	152.376	89.7242	257.511	36.036	54.0541
399.232	134.906	35.6245	109.297	350.757	152.696	272.74	259.295	379.156	54.8772
195.454	135.135	191.887	110.166	231.765	153.245	293.182	259.523	274.981	55.1973
160.196	136.599	112.27	110.486	78.7945	153.336	21.3107	261.856	369.186	55.1973
225.408	137.147	391.64	110.578	427.631	153.976	423.378	263.868	179.814	55.5174
21.2192	137.879	201.811	110.761	388.028	154.617	105.181	263.959	71.9349	55.6089
114.282	137.879	146.248	110.898	138.428	155.577	377.555	264.508	308.959	55.7461
316.87	138.108	14.1309	111.081	13.7193	156.812	182.009	265.011	19.0241	55.8376
338.044	138.428	294.874	111.401	158.321	157.04	61.7826	266.292	87.0718	55.929
413.134	138.839	170.257	111.629	327.8	157.909	223.396	267.252	139.571	56.1577
263.868	138.931	375.635	111.858	98.8247	158.824	346.092	267.252	255.591	56.1577
292.77	139.159	400.421	112.361	203.732	159.281	42.0725	268.075	357.113	56.1577
243.655	140.852	179.357	113.321	253.807	159.281	133.946	268.715	44.7249	56.2491
177.482	141.355	82.0872	113.413	374.491	159.373	203.64	269.264	200.027	56.4778
368.546	141.812	308.09	113.962	116.706	159.464	338.501	269.447	335.62	56.5693
306.626	142.635	327.48	113.962	63.5661	159.601	239.63	270.407	99.6479	56.7065
47.2859	142.864	259.112	114.282	312.526	159.784	84.1908	272.1	51.7218	57.5296
79.7549	142.864	131.614	114.785	219.372	160.013	402.844	272.648	64.435	57.5296
347.144	143.047	423.286	115.013	34.7556	160.516	279.508	274.249	111.629	57.5296
213.472	143.824	246.719	115.334	296.977	161.065	150.043	274.523	236.338	57.5296
135.638	144.236	23.3228	115.425	177.665	162.848	117.666	275.163	293.09	57.5296
228.289	144.784	350.986	115.425	192.619	163.626	309.279	275.392	284.904	57.6211
123.702	144.967	159.601	115.562	394.704	163.717	257.694	277.633	5.67065	57.7583
155.028	145.287	361.778	116.385	239.082	164.129	172.177	280.697	27.6673	57.9412
189.235	145.379	217.497	117.437	265.423	164.22	17.4235	283.349	431.289	57.9412
386.015	146.019	272.511	117.574	82.8189	164.54	193.762	283.532	169.342	58.1698
36.9964	146.156	104.13	117.895	359.354	165.409	132.391	284.493	393.424	58.2613
66.2185	146.248	121.599	118.718	407.829	165.729	325.239	285.041	267.435	58.49
283.852	148.351	36.7677	118.809	340.284	165.821	70.5629	285.224	162.345	58.5814
422.234	149.861	230.393	118.809	424.247	165.821	231.445	285.956	207.939	58.7186
246.49	149.952	93.1083	118.946	282.48	167.01	373.622	285.956	80.075	58.8101
14.7711	150.181	412.905	119.266	52.1334	169.022	94.2516	286.276	246.261	58.8101
266.703	150.364	315.635	119.587	165.501	169.022	398.729	287.968	374.354	58.8101
146.156	150.501	340.513	119.587	124.526	170.897	37.408	288.105	422.875	58.8101
100.197	150.684	393.424	119.587	304.934	170.897	155.44	289.386	188.778	59.2217
297.709	150.912	206.476	120.41	12.2102	172.269	299.63	291.398	414.826	59.4503
197.604	151.232	69.5111	121.279	384.095	172.817	421.777	292.221	383.592	59.5418
169.113	151.553	49.5724	121.37	321.763	173.046	207.527	293.502	350.437	59.6332
403.988	152.696	6.31088	121.782	25.8838	173.138	273.471	294.462	121.69	59.7704
314.446	153.336	369.689	122.33	103.489	173.138	250.926	298.578	401.564	60.2735
354.278	153.885	303.014	123.062	246.079	173.229	0.503041	298.669	216.125	60.5021
326.519	154.068	381.031	123.702	214.936	173.641	178.214	298.898	339.416	61.1424
118.398	154.296	140.12	123.885	148.168	173.961	341.565	299.401	152.604	61.2338
0.91462	154.708	290.3	124.205	188.183	174.738	53.9169	300.041	318.059	61.3253
338.913	156.4	61.9655	124.526	348.333	176.202	193.351	300.361	129.19	62.1942
370.467	156.72	281.52	124.983	277.404	177.894	111.309	300.498	329.263	62.2856
431.335	156.949	163.808	125.166	201.719	177.985	82.0872	300.91	11.387	62.5143
90.7761	157.589	330.544	125.394	228.289	178.625	133.946	301.23	355.742	62.5143
212.192	157.772	252.207	126.218	266.292	178.763	390.451	302.922	277.176	62.8344
23.3228	158.961	353.318	126.218	1.55485	179.174	366.946	303.334	366.763	63.0173
46.5084	159.052	192.619	127.315	48.9779	179.997	22.9112	303.654	136.095	63.246
257.923	159.373	395.985	127.498	84.4194	179.997	318.791	306.718	103.352	63.3374
275.941	160.013	406.869	127.91	365.482	180.134	216.445	307.267	95.4406	63.4746
58.5814	160.104	315.635	128.367	116.614	181.369	148.58	309.05	69.2825	63.5661
186.583	160.516	426.579	129.419	31.5087	181.506	98.7333	310.422	113.321	63.7948
231.125	161.293	39.8774	129.83	420.314	181.598	232.496	310.559	408.652	63.7948
74.2672	161.385	110.029	129.922	334.156	181.689	186.583	312.023	35.7159	63.8862
134.495	162.116	241.323	129.922	383.912	181.689	278.365	312.023	222.344	63.9777
148.168	162.665	223.533	130.059	305.758	182.009	263.731	314.035	286.825	64.1149
308.41	162.665	152.193	130.15	69.0538	182.147	168.382	315.635	258.014	64.6179
243.426	162.757	178.854	130.15	402.753	182.238	424.978	316.276	176.75	64.8466
159.373	162.848	264.371	130.471	136.827	183.701	38.0482	316.459	395.756	65.0295
412.677	162.848	417.661	130.882	157.772	184.662	201.948	316.55	243.106	65.4868
286.916	163.488	362.098	131.614	235.378	184.799	60.4107	317.327	307.587	65.4868
105.501	164.357	90.4559	131.843	185.942	185.211	126.766	317.968	147.208	65.6697
324.279	164.997	24.5118	132.071	320.483	185.211	11.387	319.02	48.9779	65.8069
382.631	165.18	74.0385	132.071	18.0637	185.394	349.705	319.34	233.274	65.8069
14.5425	166.552	198.427	132.163	173.549	185.394	401.564	321.855	296.017	65.8984
268.532	167.33	3.2469	132.574	251.475	186.262	109.297	322.907	201.719	65.9898
203.64	168.244	131.019	132.894	109.846	189.738	85.1511	323.455	346.412	66.127
216.445	169.022	209.036	133.352	292.77	190.287	332.327	324.507	86.8432	66.6301
355.101	170.165	328.623	134.083	357.434	190.378			215.988	66.8587
84.328	170.257	345.361	134.266	279.965	190.607			429.963	66.9502
119.038	170.577	54.0541	134.724	331.687	191.11			22.7283	67.1789
400.832	171.034	279.188	134.815	218.869	191.659			267.115	67.1789
311.154	171.354	120.41	135.455	203.32	192.207			388.256	67.499
257.374	171.949	377.738	136.919	147.208	192.802			321.352	67.6819
367.494	172.269	306.535	137.467	345.681	193.442			157.589	68.002
342.068	172.406	289.386	137.97	96.1723	194.22			170.394	68.002
417.25	172.726	15.5028	138.519	264.051	194.403			251.886	68.5508
65.2582	172.817	172.086	138.519	3.56702	196.232			121.599	68.8709
30.3197	173.046	222.893	138.839	369.278	196.323			330.864	69.3739
142.864	173.138	386.656	139.068	310.102	196.415			418.53	69.6026
295.697	173.549	44.4963	139.159	410.893	197.055			276.261	69.8313
430.146	173.869	157.452	139.48	78.0628	197.375			185.942	69.9227
274.112	174.098	84.6481	139.663	429.506	197.787			61.2338	70.0142
240.865	174.418	106.553	140.12	388.988	197.924			355.97	70.1514
223.625	174.51	186.354	140.44	58.2613	198.198			143.047	70.3343
170.074	174.601	362.738	140.943	187.543	198.656			195.271	70.3343
45.4566	175.15	251.886	141.263	247.679	199.067			301.322	70.3343
325.696	175.973	317.831	141.355	124.663	199.799			37.408	70.5629
94.8918	176.933	261.856	141.492	173.229	199.799			310.651	70.8831
191.887	177.07	350.848	142.223	40.4719	200.027			99.7851	70.9745
286.093	177.253	136.599	142.635	232.405	200.21			178.122	70.9745
379.156	178.625	335.711	143.047	217.268	201.628			401.061	71.066
133.626	178.763	75.5476	143.275	333.105	201.719			236.521	71.2946
20.9905	181.049	234.646	144.236	27.027	202.131			9.8779	71.5233
110.029	181.506	273.7	144.556	284.401	203.183			408.241	71.7062
152.376	181.598	148.9	144.784	134.586	203.32			364.522	72.0263
80.6238	181.918	210.5	145.516	316.87	204.555			424.978	72.1635
211.78	182.467	198.747	146.019	155.76	206.247			208.168	72.255
343.669	184.022	424.338	146.476	296.794	206.384			107.697	72.3465
297.617	184.799	397.86	146.751	109.206	206.476			373.714	72.5751
177.665	184.982	382.631	147.071	355.421	206.796			19.207	72.8952
393.973	185.073	297.709	147.3	402.433	207.207			285.362	72.9867
127.498	185.394	58.2613	147.62	87.895	207.939			132.254	73.2153
227.558	185.942	288.105	147.62	185.622	208.168			26.2953	73.6269
7.86573	186.034	31.8288	147.94	268.532	208.168			262.999	73.6269
360.909	187.406	87.392	148.168	203	209.448			389.72	73.7184
263.411	187.863	115.013	148.26	72.9867	210.18			53.1852	73.8556
327.708	187.863	408.332	148.351	56.1577	210.728			151.644	74.0385
310.834	188.366	18.704	148.9	169.754	211.963			255.088	74.2672
185.531	188.778	1.73778	148.992	16.5546	213.655			292.861	74.3586
40.7006	189.646	174.418	149.54	229.112	213.655			44.8164	74.4501
274.432	189.967	127.91	150.775	386.244	213.975			319.202	74.5873
99.7851	190.287	325.879	150.775	342.388	214.204			166.369	74.7702
199.707	190.287	163.168	150.912	121.37	214.936			340.193	74.9074
413.134	190.287	104.312	151.004	370.558	215.164			70.9745	75.4104
430.146	190.79	227.74	151.232	255.499	215.667			225.865	75.9592
64.2063	191.11	371.93	151.553	34.9842	216.125			160.653	76.0507
234.966	191.247	250.743	152.787	143.504	216.216			348.242	76.3708
214.936	191.43	343.12	152.787	241.002	216.216			382.54	76.4622
135.044	191.567	242.054	153.565	320.483	217.497			214.433	76.6909
80.3951	191.979	71.9349	154.296	419.673	218.32			121.05	76.7824
379.019	192.802	148.672	154.479	79.7549	218.548			82.0872	77.2397
254.31	193.991	39.6488	155.028	214.844	219.509			92.2394	77.3311
283.669	194.631	304.065	155.44	303.883	220.332			191.75	77.4226
163.397	195.592	261.947	155.577	278.776	220.881			198.838	77.4226
398.088	196.323	358.165	155.988	99.4649	221.704			62.7429	77.6513
362.921	197.055	395.848	156.08	186.994	221.704			243.198	77.7427
297.297	197.146	334.568	156.492	360.269	221.841			278.045	77.7427
115.974	197.284	381.259	156.629	115.882	223.533			3.65848	78.0628
180.958	197.375	278.456	157.04	56.8894	223.716			329.995	78.0628
348.562	197.604	186.354	157.36	168.885	224.036			300.819	78.7945
16.6918	198.656	318.791	158.321	287.785	225.317			416.381	78.7945
46.5084	198.747	234.417	158.412	332.876	225.317			231.445	79.1146
30.5483	199.296	419.17	159.052	401.381	225.317			144.144	79.2518
337.952	199.296	7.45415	159.601	155.257	225.865			109.068	79.7549
206.476	200.439	211.46	160.333	199.387	226.048			273.609	79.8921
242.877	200.668	85.2883	160.424	262.999	226.597			356.793	80.075
91.1876	200.759	104.953	160.424	135.227	226.917			409.613	80.1665
321.535	200.851	161.065	160.516	381.9	227.558			427.082	80.3951
222.573	200.988	129.19	160.745	26.2039	228.518			310.971	80.8067
145.059	201.719	201.079	161.385	230.301	228.792			128.779	81.0354
264.371	203.915	27.5758	162.025	40.0604	229.341			174.601	81.0354
159.052	204.463	403.713	162.208	249.143	229.432			338.821	81.3555
126.675	205.195	430.786	162.345	8.50597	229.753			12.759	81.6756
304.614	205.744	290.3	162.848	217.68	231.902			208.488	81.6756
416.518	206.384	121.599	162.985	95.9437	233.137			363.699	81.767
195.774	206.567	247.45	163.808	184.57	233.457			118.077	81.9042
76.6909	206.887	387.616	163.9	317.648	235.606			184.662	81.9957
7.45415	207.024	258.152	164.22	127.727	235.698			399.872	82.0872
395.756	207.116	364.613	164.357	424.658	236.109			34.9842	82.1786
287.877	207.436	53.8254	164.449	407.6	236.749			392.555	82.1786
426.67	207.847	142.955	164.54	359.446	237.07			19.1156	82.4073
138.108	208.259	175.15	164.86	299.309	237.298			102.849	82.4987
230.21	208.396	42.3926	165.501	379.43	237.39			373.622	82.4987
172.726	208.899	349.065	166.461	80.075	237.618			152.787	83.0475
324.187	209.357	303.883	166.552	343.897	237.618			222.481	83.0475
256.139	209.951	18.5668	167.01	154.617	238.35			45.4566	83.139
338.272	209.951	313.623	167.193	56.7065	239.082			137.559	83.2762
51.9047	210.18	328.623	167.193	37.7281	239.722			292.633	83.4591
376.046	210.591	376.046	167.421	166.141	239.951			89.3127	83.6877
276.856	211.049	153.748	167.513	206.476	240.134			263.228	83.8707
95.212	211.643	225.957	167.513	397.037	240.865			239.722	84.1908
30.2282	211.872	273.471	168.382	284.264	241.414			73.8556	84.4194
185.942	211.872	341.885	168.382	325.559	241.505			383.775	84.4194
211.232	212.283	68.2307	169.113	229.57	241.734			167.101	84.5109
365.985	212.741	418.21	169.525	11.7986	242.054			322.404	84.5109
245.21	213.152	1.23474	170.074	269.584	242.054			52.1334	84.6481
112.041	214.204	199.067	170.805	254.539	242.374			285.682	84.9682
0.45731	214.936	185.073	171.217	112.59	242.786			64.6179	85.0597
152.924	216.856	134.266	172.177	194.951	242.786			198.838	85.0597
403.896	216.856	220.332	172.909	139.48	244.387			252.207	85.3798
294.005	217.085	114.602	173.046	177.802	245.027			418.393	85.6085
264.051	217.268	359.446	173.138	214.616	246.261			25.8838	85.7914
64.8466	217.817	93.1083	173.366	314.355	247.954			360.177	86.4316
133.443	217.817	20.579	173.869	361.046	249.646			275.804	86.5231
197.055	217.817	265.651	174.281	261.856	250.423			317.419	86.6603
169.342	219.189	286.733	174.281	418.302	250.606			2.92678	86.7517
351.717	219.692	395.528	174.418	78.1543	251.063			330.635	86.7517
312.983	220.149	427.951	175.333	337.129	251.063			347.784	87.0718
103.992	221.384	376.183	175.47	294.965	251.246			96.904	87.1633
15.5028	221.612	208.168	175.561	372.982	251.566			300.59	87.6206
180.775	221.612	232.085	175.881	242.237	251.658			215.256	87.7121
122.833	222.664	99.4649	176.11	124.754	251.795			180.455	87.895
322.815	222.801	39.1	176.43	276.535	252.755			192.482	88.1237
144.327	223.625	321.443	176.613	161.613	252.847			10.3352	88.3523
86.7517	223.716	404.857	176.613	100.745	253.167			428.271	88.3523
230.621	224.036	53.5967	177.665	53.5967	253.99			403.256	88.4438
47.7889	224.265	337.952	177.802	33.7038	254.539			41.9811	88.6724
32.7434	225.637	126.355	178.122	177.345	255.179			107.056	88.8554
270.636	225.728	152.924	178.214	393.835	255.819			378.378	88.8554
251.886	226.277	75.2275	178.534	211.963	256.322			231.765	88.9925
394.796	226.369	250.514	178.534	19.5271	256.963			338.821	89.1755
77.7427	226.597	168.793	178.763	226.917	256.963			81.6756	89.587
304.843	226.689	295.194	179.814	138.519	258.563			148.26	89.9072
419.353	227.009	7.45415	180.226	71.8434	259.203			266.52	90.3645
219.92	227.969	242.054	180.637	7.45415	260.575			260.255	90.5474
376.275	228.381	193.259	180.775	193.671	260.804			161.796	90.7761
291.993	229.112	181.369	181.598	347.144	262.267			369.507	90.7761
193.671	229.432	310.742	181.918	118.169	262.359			411.442	90.7761
361.869	229.89	142.452	182.147	322.084	262.679			128.55	90.8675
340.696	229.981	360.269	182.238	387.708	264.188			73.3983	91.0047
116.706	230.942	390.451	182.65	305.254	264.828			137.879	91.0962
283.029	232.222	223.213	183.198	405.268	264.92			355.833	91.3248
243.015	232.405	163.9	183.61	286.276	265.103			420.634	91.5078
158.961	232.634	424.338	183.61	251.383	265.423			117.346	91.7364
207.024	232.634	29.0392	183.93	267.252	265.651			393.104	91.8279
136.599	232.725	106.873	184.159	89.587	266.795			60.182	92.0565
173.229	232.725	326.519	185.073	333.608	267.892			252.435	92.0565
323.776	233.045	208.808	185.942	155.028	268.395			170.714	92.148
54.8772	233.594	262.176	186.034	29.9995	268.624			36.036	92.2394
261.947	234.326	94.5717	186.171	177.07	269.127			384.872	92.3766
148.168	235.286	412.494	186.262	49.5724	270.407			283.944	92.5596
1.64632	237.07	341.976	186.491	352.86	270.545			296.886	92.7882
69.5111	237.161	272.968	186.674	225.225	271.139			21.2192	93.0169
102.529	237.161	287.557	187.223	191.43	272.008			50.67	93.4285
227.649	237.161	59.9534	187.634	137.788	272.511			312.663	93.5199
252.115	237.801	44.9536	188.503	374.034	272.968			238.533	93.6114
26.6154	238.533	317.51	188.503	71.7062	273.609			154.937	94.1601
186.491	239.951	375.543	188.503	103.581	274.249			215.988	94.1601
309.279	240.454	132.803	188.595	161.934	274.843			306.215	94.5717
383.455	240.682	77.6513	189.006	12.6675	274.981			323.044	94.8004
161.156	241.185	352.266	189.006	293.41	275.804			207.024	95.029
418.85	242.877	117.986	189.098	205.515	276.856			346.412	95.1205
350.345	243.198	175.881	190.195	320.483	277.313			100.837	95.212
294.325	243.746	190.287	190.287	127.407	277.404			232.314	95.3034
239.082	245.347	149.952	190.79	38.1397	278.227			179.357	95.5321
172.589	245.53	403.073	191.11	235.698	278.227			331.596	95.7607
87.1633	246.079	388.119	191.247	337.541	279.325			187.543	96.1723
197.467	246.49	239.402	191.659	422.966	279.325			223.853	96.2638
367.174	246.49	12.1187	192.07	279.737	280.377			65.8984	96.401
42.9414	247.45	227.237	192.07	389.4	281.429			275.804	96.904
209.219	247.771	365.711	193.671	58.3985	281.749			404.125	97.2241
321.992	247.771	168.473	193.899	359.126	282.069			127.498	97.7729
125.897	247.954	299.218	193.899	84.6481	283.121			144.007	97.7729
276.032	248.091	427.493	194.22	182.97	283.121			270.636	97.9558
73.6269	248.502	35.533	194.311	263.091	283.532			423.698	97.9558
224.905	248.502	61.4625	194.631	166.141	284.081			339.416	98.093
331.824	248.502	125.486	195.592	246.81	284.264			28.7191	98.2759
140.943	248.731	215.347	195.912	218.457	284.401			367.815	98.2759
24.6033	249.051	248.182	196.095	145.287	285.041			80.8067	98.4131
152.056	249.463	89.8157	196.735	24.9234	285.682			93.84	98.4131
248.182	249.463	340.284	196.735	100.197	285.682			359.354	98.5046
4.48164	249.554	257.603	197.284	412.677	286.596			116.477	98.7333
105.822	250.194	280.88	197.787	200.53	288.517			40.9293	99.1448
399.369	250.286	325.147	197.924	306.398	288.837			221.612	99.5564
188.778	252.618	355.833	198.107	112.681	289.797			392.052	99.5564
266.292	252.618	198.015	198.198	236.521	289.889			414.277	99.6479
57.9412	253.578	73.6269	198.656	50.3498	290.529			398.409	99.7851
286.733	255.682	107.834	198.838	288.837	290.758			322.907	99.8765
169.205	256.231	304.614	199.296	84.328	291.489			431.198	99.968
119.77	256.78	153.976	199.616	373.119	291.672			107.193	100.197
410.893	256.871	23.0027	199.799	317.419	291.993			197.695	100.517
302.053	256.963	295.605	200.851	72.255	292.953			285.956	100.517
219.829	257.603	266.703	200.988	344.309	292.953			384.644	100.928
383.272	257.831	403.896	201.628	33.5208	294.325			132.574	101.157
318.562	258.152	162.757	201.719	189.738	294.645			295.925	101.248
201.811	258.334	417.433	201.948	161.065	296.017			251.383	101.569
86.203	258.563	180.546	202.451	126.218	296.245			5.12187	101.797
242.786	258.883	379.43	202.451	12.8504	297.526			376.366	101.797
100.745	259.386	49.7096	202.543	398.82	297.846			152.604	101.889
149.632	259.386	9.8779	203.183	145.699	299.538			161.293	101.889
354.278	259.523	312.251	203.915	305.437	300.27			59.9534	101.98
130.882	260.164	130.379	204.052	385.055	300.27			259.295	102.3
333.425	260.347	98.8247	204.235	206.567	300.361			215.805	102.529
178.763	260.667	145.379	204.783	226.048	300.498			240.865	102.758
231.993	260.667	370.467	205.424	272.74	301.23			21.2192	103.352
46.5084	262.496	390.68	205.424	101.889	301.55			365.482	103.352
158.824	262.908	225.317	205.515	256.963	302.922			226.689	103.489
30.2282	263.411	37.0878	206.064	171.125	303.425			347.922	103.809
256.46	264.508	349.934	206.155	241.826	303.974			328.943	103.992
9.46632	264.6	326.748	206.247	64.2978	305.026			302.373	104.13
72.758	266.612	116.294	206.476	333.288	305.026			425.161	104.13
371.519	267.252	233.594	206.567	288.425	306.398			74.7702	104.221
315.635	267.664	204.463	206.796	27.1642	306.718			172.817	104.221
196.003	268.395	59.5418	207.207	117.254	306.718			209.036	104.45
94.2516	268.532	18.0637	207.665	195.271	307.267			147.071	104.541
275.301	268.944	215.988	207.847	87.6206	308.547			281.84	104.541
144.144	269.584	275.072	208.168	211.78	308.547			406.229	104.861
170.577	269.996	247.679	209.036	14.5425	308.639			90.2273	105.273
385.695	270.225	334.888	209.448	351.077	309.37			50.1212	105.913
20.2588	270.316	83.139	210.088	412.905	309.919			268.944	106.004
206.384	270.407	286.413	211.232	368.318	310.559			416.381	106.004
297.206	270.636	260.667	211.643	54.1455	311.291			34.4355	106.142
111.218	271.459	182.878	211.963	2.0579	311.382			99.7851	106.142
248.091	272.237	101.569	212.832	159.144	311.382			339.416	106.462
284.172	272.328	132.711	213.152	181.598	311.474			125.486	106.553
182.009	273.471	413.957	213.655	41.9811	312.434			234.966	106.553
227.42	274.112	193.442	213.884	324.507	312.526			15.0912	106.645
354.873	274.752	91.5992	214.296	132.391	313.303			357.525	106.645
127.91	274.981	297.206	214.844	392.555	314.538			389.171	106.645
214.296	275.301	150.043	215.347	299.127	315.178			167.833	107.697
43.4445	275.392	350.254	215.347	102.437	316.459			115.974	107.834
408.469	275.392	234.097	215.667	241.414	316.779			141.903	107.834
58.9015	275.484	363.15	215.896	144.007	317.19			316.779	107.925
418.942	275.804	380.939	216.125	272.831	317.968			371.29	107.925
4.71029	276.856	305.437	216.308	75.7306	318.151			378.378	107.925
263.319	277.084	423.789	216.536	226.186	319.843			400.101	107.925
86.5231	278.136	26.6154	216.628	211.232	321.123			202.863	108.154
152.467	278.548	60.5021	216.765	283.029	321.352			250.926	108.748
333.105	279.325	10.3352	216.856	194.494	321.992			348.973	109.068
316.047	279.416	315.407	216.948	118.718	322.266			226.506	109.297
168.382	279.645	45.7767	217.085	319.66	322.495			291.581	109.297
237.481	279.737	173.549	217.177	1.3262	322.907			309.05	109.297
370.65	280.057	401.061	217.497	20.8076	322.907			219.372	109.846
252.847	280.148	273.792	217.908	411.625	322.907			284.172	110.029
198.107	281.017	140.76	218.32	348.425	323.547			178.305	110.166
106.553	281.109	207.756	218.32	177.482	324.096			8.09439	110.257
74.6787	282.252	76.0507	218.64	366.214	324.187			42.4841	110.486
304.203	282.709	324.416	219.189					67.2703	110.486
136.187	283.441	161.796	220.012					322.266	110.486
288.288	283.944	255.362	220.012					1.23474	110.578
31.1885	284.172	222.801	220.241					332.007	110.578
209.128	284.264	111.721	220.561					189.418	110.669
50.5328	285.224	121.69	220.881					84.4194	111.081
388.759	285.362	373.302	221.292					132.894	111.218
276.764	286.276	389.171	222.893					262.679	111.309
120.09	287.236	28.7191	222.984					57.0266	111.858
3.01825	288.746	191.339	223.396					104.13	111.858
13.8108	288.837	246.17	225.225					196.506	111.858
180.866	289.386	42.6213	225.317					420.222	112.178
169.754	290.118	180.455	225.637					244.707	112.361
79.0232	290.3	309.279	226.597					48.5206	112.91
333.699	291.489	339.141	226.689					74.7702	112.91
108.337	291.81	212.1	226.78					159.784	112.91
151.553	291.81	73.8556	227.009					363.699	113.733
225.317	291.901	430.283	227.1					407.097	113.87
354.278	291.901	60.5021	227.237					92.6968	114.053
247.45	292.313	258.883	227.42					393.515	114.053
198.976	292.77	85.6085	227.74					27.1642	114.465
95.029	293.182	295.834	227.74					300.91	114.465
379.979	293.273	166.552	228.198					272.008	114.602
215.988	293.41	155.44	228.929					339.141	114.693
265.24	294.233	281.52	229.021					385.787	115.013
136.278	294.645	98.9162	229.112					184.57	115.562
61.2338	294.782	350.254	229.112					153.016	115.654
28.9477	295.697	224.905	229.661					36.5848	115.745
282.892	296.154	415.329	229.661					113.87	115.745
294.142	296.474	270.407	229.981					429.323	115.882
410.344	296.474	18.2467	230.301					376.183	115.974
312.251	297.297	366.122	230.53					311.154	116.614
233.914	299.127	320.391	230.713					126.446	116.706
75.4104	300.27	124.526	231.125					212.832	116.706
182.878	300.91	386.244	231.445					280.377	116.797
370.467	300.91	234.509	231.765					416.61	116.934
48.6578	301.87	108.154	231.902					58.2613	117.117
93.0169	302.511	402.844	232.954					292.77	117.254
37.9567	303.105	2.92678	233.045					143.595	117.574
121.141	303.334	191.979	233.914					171.766	117.574
349.385	303.974	251.383	234.326					17.0119	117.666
166.461	304.065	374.811	234.417					263.959	117.895
157.681	304.203	76.2793	234.966					226.506	118.169
9.69497	304.386	139.159	235.057					236.246	118.169
424.018	304.386	57.5296	235.149					346.321	118.169
207.665	305.117	302.831	235.149					203.412	118.306
191.43	305.346	33.9324	235.286					354.873	118.306
144.236	306.215	199.067	235.286					403.165	118.398
220.789	306.398	45.3652	236.109					254.31	118.489
61.0052	306.626	117.666	236.109					325.376	118.946
108.017	307.038	175.881	237.71					81.9957	119.038
264.051	307.038	363.882	239.173					371.107	119.038
300.178	308.547	14.7711	239.31					3.56702	119.449
400.101	308.822	210.591	239.31					136.919	120.41
133.443	309.37	419.445	239.402					72.8952	120.501
274.112	310.834	350.986	239.493					194.631	120.73
235.378	311.611	92.148	239.813					98.093	121.05
246.399	311.703	243.335	240.134					304.203	121.05
25.1521	312.343	333.196	240.454					330.315	121.05
361.229	312.434	147.3	240.545					178.305	121.37
329.675	312.663	259.935	240.865					245.85	121.462
124.022	312.846	289.386	241.002					362.51	121.919
79.7549	313.074	277.313	241.094					396.168	122.01
67.9106	314.126	314.035	241.414					285.224	122.102
188.503	316.047	69.0538	241.734					422.875	122.102
381.122	316.047	158.504	243.838					162.757	122.33
172.909	316.138	392.555	243.929					25.6551	122.651
209.448	316.367	303.974	244.478					117.026	122.971
315.498	316.55	106.462	244.569					44.7249	123.154
94.8004	317.968	31.5087	244.707					89.1755	123.474
420.725	318.242	131.339	245.53					317.831	123.794
254.95	318.699	49.3895	245.758					10.3352	124.022
111.95	318.791	224.905	245.758					109.846	124.022
139.891	319.202	342.388	245.941					428.454	124.022
230.804	319.843	235.926	246.399					123.154	124.205
152.284	320.483	204.783	246.49					406.229	124.205
291.261	320.574	430.695	246.902					215.164	124.434
163.488	321.352	189.738	247.359					350.345	124.526
47.8804	321.763	82.0872	247.45					258.792	124.754
6.17369	322.587	168.565	247.679					386.564	124.754
218.64	323.776	378.378	247.954					188.046	125.074
340.925	323.776	251.795	248.502					276.032	125.074
394.796	323.958	406.457	248.822					228.198	125.303
127.727	324.324	94.4803	249.051					36.3562	125.486
33.8409	324.69	181.506	249.646					295.102	125.486
		21.9509	250.194					150.043	125.715
		289.477	250.194					204.692	125.897
		267.755	250.514					338.364	126.218
		146.888	251.795					375.726	126.355
		358.806	252.298					66.4472	126.446
		69.9227	252.435					415.878	126.446
		8.73462	252.527					311.931	126.675
		108.565	253.487					237.481	127.086
		120.501	253.487					222.024	127.178
		399.14	253.487					54.1455	127.727
		327.8	254.219					245.438	127.727
		238.762	254.447					19.5271	127.818
		423.606	254.767					266.063	127.818
		216.628	255.27					1.3262	128.047
		205.927	255.362					142.772	128.047
		193.991	255.682					73.7184	128.367
		280.148	255.911					301.093	128.687
		44.0847	256.002					175.333	128.779
		346.961	256.551					92.4681	129.419
		56.2491	256.871					131.934	129.51
		316.138	256.871					197.284	129.602
		374.034	257.283					379.156	129.602
		298.806	257.374					431.106	129.739
		154.479	258.152					366.305	129.83
		26.9356	259.203					332.236	130.059
		250.835	259.203					357.754	130.242
		167.193	259.295					168.061	130.379
		96.0809	260.347					345.681	130.379
		134.815	260.347					48.6578	130.471
		81.6756	260.484					158.412	130.562
		262.679	260.484					251.155	130.699
		241.414	261.078					183.29	130.791
		185.714	261.627					82.0872	131.019
		228.609	261.627					391.092	131.019
		384.232	261.627					213.472	131.522
		69.6026	262.908					289.066	131.522
		336.672	262.908					102.529	132.071
		311.382	263.411					278.456	132.071
		417.89	263.548					325.788	132.071
		401.564	263.959					190.058	132.574
		170.485	264.508					31.9202	132.711
		324.279	264.828					421.366	132.711
		366.534	264.828					66.8587	132.894
		214.524	264.92					319.34	132.894
		278.868	265.011					401.152	133.214
		430.695	265.423					220.561	133.626
		18.3839	266.383					229.661	133.946
		95.212	267.023					409.933	133.946
		144.144	267.252					17.6064	134.175
		233.457	267.343					266.292	134.495
		112.178	267.435					115.425	135.044
		200.53	267.572					340.376	135.318
		8.96328	267.984					294.874	135.547
		126.035	267.984					154.708	135.638
		258.152	267.984					373.439	135.775
		293.913	268.212					144.967	135.867
		54.5571	269.767					260.987	136.187
		188.503	269.767					106.645	136.278
		39.7402	270.545					238.35	136.278
		153.976	271.276					350.437	136.416
		215.576	271.688					382.54	136.599
		341.336	272.968					58.1698	136.736
		359.126	273.289					204.783	136.919
		414.506	273.289					284.584	137.056
		177.894	273.7					88.1237	137.239
		312.846	273.929					360.177	137.559
		1.55485	274.02					391.32	137.65
		326.199	274.843					25.8838	137.879
		246.399	274.981					8.96328	138.108
		269.356	275.163					246.261	138.108
		67.8191	275.301					366.763	138.108
		165.821	275.392					39.8774	138.199
		82.6359	275.621					423.789	138.291
		380.391	275.804					135.455	138.428
		137.879	276.032					175.333	138.748
		198.838	276.352					275.163	138.748
		368.958	276.673					430.969	138.931
		395.756	277.084					125.394	139.068
		31.6916	277.176					2.14936	139.159
		225.865	277.176					49.298	139.342
		96.401	277.953					332.236	139.342
		48.6578	278.365					76.2793	139.571
		122.102	278.456					255.179	139.8
		429.643	280.88					166.369	139.983
		112.59	281.017					98.2759	140.211
		22.1795	281.337					197.284	140.44
		298.989	281.429					346.321	140.76
		285.773	281.52					321.763	140.852
		408.881	281.977					216.125	140.943
		151.415	282.572					310.834	141.034
		214.113	282.709					372.662	141.492
		241.643	282.892					119.038	141.675
		205.195	283.349					417.89	141.675
		9.69497	283.944					229.432	141.903
		77.6513	283.944					400.512	141.903
		41.1122	284.584					31.6001	142.223
		160.973	284.584					302.373	142.452
		89.1755	285.133					151.553	142.544
		272.511	285.773					68.5508	142.772
		186.034	285.865					192.07	142.955
		350.986	286.505					15.8229	143.047
		129.19	287.236					238.441	143.047
		224.905	287.374					406.64	143.047
		423.378	287.374					268.075	143.184
		57.9412	287.465					296.337	143.184
		318.791	287.877					207.024	143.504
		254.767	287.968					382.22	143.595
		383.043	288.288					341.016	143.687
		340.284	288.746					110.257	143.915
		191.979	288.837					356.702	144.007
		174.83	289.157					58.3985	144.327
		367.403	289.249					182.009	144.327
		25.335	289.66					392.281	144.327
		145.699	290.3					286.185	144.784
		402.616	290.758					159.052	144.876
		243.838	291.078					85.2883	145.059
		120.181	291.398					279.188	145.699
		137.056	292.313					141.492	146.019
		5.12187	293.09					321.672	146.019
		294.965	293.273					173.778	146.156
		81.4469	293.41					362.738	146.248
		313.074	293.502					129.922	146.568
		233.777	294.142					315.178	147.071
		328.211	294.233					5.85357	147.208
		98.8247	294.325					222.984	147.208
		373.302	295.102					101.157	147.3
		206.796	295.697					373.302	147.528
		153.107	295.834					243.106	147.711
		277.084	296.017					41.3408	147.848
		109.709	296.245					302.602	148.26
		394.293	296.657					91.5078	148.351
		44.0847	296.886					419.17	148.58
		68.6422	297.526					74.0385	148.763
		19.6186	297.938					202.771	148.992
		197.375	298.258					251.978	148.992
		217.177	298.258					329.583	148.992
		183.839	298.578					348.104	149.22
		90.7761	298.669					429.414	149.403
		263.548	298.989					193.442	149.54
		426.259	298.989					215.485	149.54
		414.597	299.127					259.706	149.54
		138.519	299.309					403.805	149.632
		165.409	299.95					25.9752	150.043
		285.041	301.002					51.0815	150.181
		319.66	301.23					166.69	150.181
		122.01	301.733					231.673	150.181
		344.217	301.733					356.885	150.181
		362.51	302.191					292.313	151.095
		189.098	303.334					273.06	151.232
		230.713	303.425					137.056	151.415
		5.67065	304.065					150.181	151.644
		57.7583	304.294					392.281	151.873
		403.576	305.437					382.403	152.056
		294.874	305.666					307.678	152.604
		72.255	305.986					337.724	152.604
		43.5817	306.306					33.5208	152.696
		130.882	306.398					67.6819	152.787
		175.653	306.626					417.753	153.245
		239.951	306.718					181.186	153.428
		33.0635	306.809					281.657	153.428
		103.901	306.947					58.3985	153.656
		392.555	307.038					122.651	153.656
		93.337	307.267					409.613	154.205
		381.351	307.358					92.6968	154.388
		162.848	308.318					319.98	154.479
		250.743	308.318					6.17369	154.617
		270.636	308.41					111.629	154.617
		204.235	308.547					155.44	154.617
		311.382	308.639					331.275	154.708
		340.925	310.102					83.139	154.937
		144.236	310.834					186.171	154.937
		221.841	310.834					365.985	155.12
		419.033	311.062					374.811	155.12
		110.898	312.114					47.7889	155.668
		65.0295	314.126					256.322	155.76
		119.77	314.126					17.9266	156.08
		234.646	314.446					296.245	156.08
		8.32304	314.675					237.298	156.217
		289.889	314.675					266.795	156.492
		431.289	314.675					205.652	156.949
		49.3895	314.767					245.941	157.36
		213.061	315.087					343.12	157.36
		319.751	315.087					273.792	157.452
		193.671	316.138					215.805	157.681
		21.3107	316.276					164.129	157.772
		81.1268	316.779					130.242	158.001
		31.0514	317.327					26.524	158.092
		151.004	317.327					68.3221	158.092
		354.461	317.327					144.327	158.092
		398.271	317.51					398.912	158.184
		133.123	317.968					106.325	158.321
		90.4559	318.379					197.787	158.504
		158.824	318.379					228.198	158.824
		376.183	318.699					423.149	158.824
		300.498	318.791					179.357	158.961
		412.997	319.431					307.907	159.144
		250.743	319.523					353.638	159.144
		220.789	320.391					362.098	159.373
		264.92	321.215					190.698	159.601
		336.352	321.215					38.1397	160.013
		274.523	321.535					288.425	160.013
		199.067	321.672					51.173	160.516
		181.506	321.992					172.909	160.516
		74.0385	322.175					241.185	160.745
		103.809	322.404					407.738	160.836
		126.126	322.587					77.1025	160.973
		54.0541	322.815					123.794	161.065
		168.565	323.455					392.372	161.293
		389.491	323.867					322.404	161.385
		430.969	324.096					384.872	161.613
		238.213	324.279					280.788	161.796
		43.0329	324.324					302.511	161.796
								368.226	161.796
								337.952	162.437
								261.856	162.848
								225.408	163.077
								91.3248	163.305
								137.239	163.305
								328.532	163.397
								345.589	163.488
								315.087	163.9
								19.0241	164.129
								167.65	164.129
								378.287	164.129
								112.041	164.357
								153.336	164.54
								251.566	164.677
								11.387	164.769
								203.732	164.997
								419.033	165.18
								127.178	165.409
								216.856	165.501
								273.471	165.638
								65.0295	166.049
								295.285	166.049
								353.821	166.552
								99.4649	167.193
								198.656	167.421
								35.2129	167.513
								187.223	167.741
								46.1883	167.924
								233.274	168.061
								320.803	168.153
								400.512	168.153
								180.134	168.382
								119.998	168.473
								26.8441	168.885
								58.3985	168.885
								308.959	168.885
								412.036	169.342
								7.36269	169.525
								87.895	169.525
								286.733	169.525
								369.918	169.525
								159.464	169.754
								345.909	169.936
								428.042	169.936
								147.62	170.074
								222.253	170.074
								238.213	170.074
								277.404	170.165
								362.921	170.165
								174.418	170.394
								392.784	170.485
								386.656	170.577
								76.3708	170.714
								138.931	170.805
								20.1674	170.897
								209.539	171.217
								106.553	171.354
								247.359	171.446
								377.647	172.086
								261.719	172.177
								406.229	172.406
								69.0538	173.046
								40.4719	173.138
								154.296	173.366
								268.304	173.366
								328.623	173.366
								337.129	173.366
								96.7211	173.458
								422.097	173.458
								298.989	173.549
								50.67	174.418
								191.887	174.51
								203.823	174.51
								252.435	174.738
								229.57	175.15
								130.059	175.241
								352.129	175.881
								282.16	176.293
								399.369	176.613
								162.757	176.75
								382.54	176.933
								314.675	177.345
								119.907	177.482
								360.726	177.574
								181.369	177.802
								5.99076	177.894
								23.963	177.894
								104.953	178.214
								301.23	178.214
								344.537	178.305
								15.5028	178.442
								87.8035	178.534
								260.255	178.534
								78.7031	178.625
								137.97	178.625
								111.721	178.854
								330.224	178.854
								369.507	178.854
								34.2525	179.083
								291.169	179.083
								211.552	179.357
								412.357	179.357
								244.707	179.906
								393.744	179.997
								218.32	180.317
								255.27	180.455
								308.41	180.455
								186.262	180.637
								235.606	180.775
								271.917	180.775
								428.042	180.866
								174.83	180.958
								62.4228	181.186
								146.888	181.278
								43.9932	181.369
								156.492	181.826
								322.495	181.918
								197.604	182.147
								204.555	182.33
								373.942	183.198
								230.073	183.29
								349.293	183.381
								120.501	183.839
								55.7461	184.022
								167.193	184.022
								131.111	184.25
								407.28	184.25
								337.952	184.342
								74.5873	184.57
								39.8774	184.89
								245.941	184.89
								96.5839	184.982
								88.7639	185.211
								355.193	185.394
								285.133	185.531
								276.535	185.942
								292.633	185.942
								313.715	185.942
								365.071	186.262
								267.115	186.583
								332.464	186.903
								415.558	187.086
								65.4868	187.223
								22.4997	187.314
								380.208	187.314
								398.729	187.314
								181.186	187.863
								202.451	187.954
								305.026	187.954
								431.106	187.954
								240.042	188.046
								12.9876	188.183
								114.373	188.275
								223.945	188.366
								256.871	188.503
								192.802	188.595
								33.0635	188.686
								215.073	188.686
								82.8189	188.778
								152.467	188.778
								346.412	188.778
								143.915	189.235
								322.815	189.235
								49.7096	189.555
								136.827	189.555
								389.811	189.555
								231.582	189.738
								102.437	189.875
								164.357	190.195
								406	190.515
								424.338	191.43
								297.938	191.567
								3.33836	192.07
								90.7761	192.299
								270.407	192.299
								210.5	192.39
								340.376	192.71
								171.628	192.802
								285.544	192.802
								370.238	192.939
								58.0784	193.031
								117.895	193.122
								250.835	193.442
								259.295	193.442
								314.446	193.579
								352.266	193.671
								127.727	193.991
								194.814	194.631
								360.589	194.631
								276.124	194.723
								70.9745	194.814
								153.336	194.951
								185.211	195.454
								324.187	195.454
								383.683	195.454
								63.9777	195.774
								240.682	195.774
								391.96	195.774
								18.704	196.003
								110.349	196.003
								229.981	196.003
								102.758	196.232
								39.8774	196.323
								26.6154	196.826
								292.77	196.826
								404.216	196.826
								175.973	196.963
								331.413	197.055
								302.922	197.146
								82.3158	197.787
								50.5328	198.015
								416.198	198.198
								236.246	198.427
								424.887	198.427
								220.469	198.518
								204.463	198.656
								270.636	198.747
								213.381	199.296
								375.955	199.296
								10.3352	199.387
								167.101	199.616
								146.888	199.799
								94.8918	200.027
								138.428	200.348
								131.431	200.439
								344.217	200.668
								261.398	200.759
								317.19	200.988
								286.916	201.308
								307.77	201.399
								367.266	201.719
								159.144	201.811
								254.219	201.948
								110.898	202.04
								359.537	202.04
								277.953	202.223
								328.532	202.771
								351.077	202.771
								192.802	202.863
								386.015	203.091
								185.211	203.503
								34.7556	203.823
								239.493	203.823
								396.579	203.823
								410.024	203.823
								294.233	204.143
								19.8473	204.372
								246.582	204.463
								77.5598	204.555
								301.002	204.555
								2.0579	204.783
								61.5539	204.783
								430.603	204.783
								120.501	204.875
								151.415	205.104
								229.112	205.104
								337.129	205.104
								103.352	205.424
								85.0597	205.515
								139.8	205.744
								270.819	205.835
								71.3861	206.064
								54.1455	206.155
								374.583	206.247
								220.241	206.384
								420.542	206.384
								200.53	206.796
								406	206.887
								45.8682	207.116
								180.866	207.436
								173.641	207.665
								165.729	208.076
								259.523	208.168
								252.207	208.396
								211.963	208.488
								309.462	208.579
								366.946	208.808
								381.031	208.808
								95.212	208.899
								28.4447	209.357
								131.934	209.539
								279.325	209.539
								243.106	209.86
								223.533	210.088
								351.717	210.5
								292.221	210.82
								235.057	210.911
								329.583	211.232
								114.282	211.369
								343.028	211.369
								190.927	211.643
								35.3958	211.78
								145.836	212.1
								265.011	212.192
								13.5821	212.421
								304.843	212.512
								154.296	212.603
								3.42983	212.741
								361.138	212.741
								105.501	213.061
								318.699	213.061
								199.479	213.152
								86.203	213.244
								176.933	213.472
								390.131	213.655
								135.638	213.884
								272.328	213.975
								401.152	213.975
								77.3311	214.113
								124.663	214.113
								23.6429	214.204
								420.222	214.296
								336.169	214.524
								63.4746	214.616
								250.286	214.844
								407.189	215.073
								289.386	215.667
								206.704	215.805
								281.52	215.896
								429.186	216.856
								217.817	217.085
								165.18	217.177
								224.265	217.268
								311.382	217.268
								325.696	217.268
								98.9162	217.588
								54.237	217.817
								68.4593	217.908
								189.646	218
								183.701	218.32
								260.027	218.457
								299.95	218.548
								15.0912	218.64
								354.461	218.64
								376.366	218.64
								345.132	218.777
								117.026	218.869
								230.073	218.869
								108.474	219.097
								245.85	219.372
								366.854	219.6
								40.7921	219.692
								89.7242	219.829
								384.644	220.241
								126.126	220.332
								31.6001	221.064
								148.672	221.292
								201.308	221.384
								391.823	221.521
								236.841	221.933
								309.69	222.481
								155.897	222.573
								423.149	222.664
								250.514	222.801
								266.2	222.801
								210.728	222.893
								405.268	223.213
								172.817	223.396
								328.532	223.533
								415.558	223.625
								339.553	223.716
								73.6269	223.853
								139.891	224.036
								377.967	224.173
								317.831	224.265
								7.04258	224.356
								62.8344	224.356
								273.7	224.356
								80.7152	224.676
								162.665	224.905
								36.7677	225.088
								257.374	225.088
								292.541	225.088
								129.007	225.225
								363.562	225.225
								52.0419	225.408
								282.389	225.637
								224.997	225.957
								358.074	226.277
								22.7283	226.689
								194.814	226.78
								236.749	227.42
								11.4785	227.558
								184.89	227.969
								2.0579	228.061
								102.758	228.061
								110.349	228.289
								346.092	228.289
								118.077	228.381
								214.616	228.929
								315.956	228.929
								147.711	229.021
								172.406	229.021
								324.507	229.112
								387.708	229.112
								397.997	229.112
								92.0565	229.432
								207.756	229.89
								162.528	230.621
								244.158	230.621
								276.124	230.713
								406.229	231.033
								141.583	231.445
								298.578	231.582
								131.111	231.765
								188.503	231.765
								72.0263	231.902
								58.3985	231.993
								265.56	231.993
								199.296	232.222
								254.447	232.222
								287.374	232.314
								371.702	232.405
								32.1489	232.817
								333.516	232.954
								45.3652	233.045
								179.586	233.365
								379.888	233.365
								427.173	233.365
								306.306	233.457
								81.0354	233.594
								103.261	233.594
								417.433	233.685
								238.67	234.006
								65.4868	234.326
								88.7639	234.509
								229.661	234.646
								346.001	234.646
								154.937	235.286
								222.664	235.286
								212.1	235.698
								355.33	235.698
								363.973	235.926
								23.46	236.018
								110.989	236.246
								278.365	236.338
								39.3287	236.521
								395.116	236.749
								122.971	236.841
								204.875	236.978
								270.316	237.07
								17.0119	237.161
								256.231	237.161
								245.941	237.39
								310.834	237.801
								168.793	238.35
								328.76	238.533
								181.506	238.67
								96.4924	238.762
								336.672	238.762
								60.9137	238.99
								5.67065	239.173
								283.669	239.173
								160.653	239.31
								233.365	239.493
								402.113	239.63
								132.071	239.722
								48.5206	239.813
								293.593	240.042
								388.256	240.225
								303.562	240.362
								319.111	240.454
								141.034	240.682
								415.42	240.682
								75.6391	240.865
								196.095	240.865
								373.119	241.185
								116.706	241.323
								355.742	241.505
								30.2282	242.054
								107.605	242.054
								264.691	242.466
								215.576	242.877
								422.875	243.015
								174.098	243.198
								190.058	243.198
								225.637	243.335
								344.72	243.426
								200.53	243.746
								250.194	243.746
								152.056	243.929
								83.0475	244.158
								336.031	244.387
								44.4048	244.569
								124.526	244.798
								24.4204	244.89
								93.337	245.347
								69.8313	245.667
								182.558	245.758
								135.135	246.079
								279.965	246.261
								288.197	246.399
								326.748	246.49
								308.547	246.582
								316.87	246.582
								381.122	246.582
								76.2793	246.719
								245.667	246.719
								299.858	246.719
								400.009	246.719
								60.2735	247.039
								372.25	247.039
								165.501	247.13
								231.125	247.222
								271.596	247.45
								18.3839	247.542
								360.589	247.771
								258.792	248.091
								110.898	248.182
								147.208	248.274
								158.412	248.502
								53.8254	248.594
								219.097	248.822
								8.96328	248.914
								413.454	248.914
								100.745	249.783
								354.553	250.194
								29.9081	250.514
								391.092	250.926
								186.583	251.063
								130.791	251.155
								117.346	251.383
								205.744	251.475
								175.47	251.566
								193.671	251.566
								423.469	251.566
								300.91	252.207
								342.937	252.435
								252.847	252.527
								237.07	252.618
								38.4598	253.075
								281.657	253.167
								46.7371	253.396
								319.202	253.487
								213.472	253.578
								87.1633	253.67
								166.781	254.127
								384.095	254.127
								12.759	254.447
								222.984	254.63
								269.447	254.63
								368.546	254.95
								232.725	255.088
								404.765	255.179
								310.651	255.362
								349.934	255.499
								245.53	255.591
								93.84	255.819
								61.7826	255.911
								80.7152	255.911
								24.5118	256.139
								142.132	256.322
								289.98	256.551
								260.895	256.642
								74.0385	256.871
								151.735	256.963
								182.147	256.963
								125.394	257.283
								113.321	257.511
								198.427	257.511
								3.2469	257.603
								333.105	257.831
								418.073	258.152
								132.894	258.472
								307.45	258.563
								173.046	258.883
								325.468	258.975
								378.836	259.615
								207.665	259.706
								238.03	259.844
								159.921	259.935
								426.35	260.164
								189.006	260.255
								399.049	260.484
								278.045	260.804
								49.481	260.987
								361.687	260.987
								340.605	261.078
								65.4868	261.398
								103.261	261.398
								40.6091	261.536
								32.0117	261.627
								143.047	261.627
								391.64	261.856
								224.173	261.947
								267.984	262.039
								13.8108	262.176
								256.642	262.176
								285.041	262.267
								215.805	262.496
								58.49	262.999
								247.45	263.228
								112.59	263.548
								300.041	263.548
								410.893	263.731
								91.0047	263.959
								370.787	263.959
								200.759	264.188
								153.245	264.508
								315.498	264.6
								293.685	264.691
								125.166	264.828
								238.03	264.92
								166.141	265.423
								352.449	266.292
								76.5994	266.383
								189.006	266.383
								208.808	266.612
								51.173	266.703
								194.22	266.703
								274.02	266.703
								130.379	266.795
								260.667	266.795
								4.61883	267.023
								86.9804	267.252
								99.8765	267.435
								36.7677	267.572
								140.44	267.572
								382.54	267.572
								229.432	267.755
								340.925	268.395
								21.768	268.532
								175.881	268.715
								419.033	268.807
								159.921	268.944
								244.249	268.944
								398.729	269.036
								117.117	269.264
								362.921	269.264
								300.361	269.447
								217.359	269.584
								182.009	269.676
								149.403	269.904
								428.682	269.996
								281.84	270.087
								308.09	270.225
								266.795	270.545
								378.607	270.636
								13.1705	270.956
								104.45	270.956
								166.69	271.048
								252.435	271.139
								324.736	271.276
								289.797	271.368
								58.0784	272.237
								130.882	272.74
								393.104	272.74
								409.521	272.74
								78.9317	272.831
								67.0417	273.151
								366.946	273.471
								44.3133	273.609
								122.422	273.609
								5.57918	274.02
								202.04	274.02
								315.498	274.02
								346.824	274.02
								261.216	274.112
								232.954	274.523
								187.314	274.66
								26.6154	274.752
								333.196	274.843
								241.094	275.301
								98.5961	275.392
								210.088	275.392
								145.287	275.484
								222.481	275.941
								52.7736	276.261
								423.606	276.352
								273.289	276.673
								154.799	276.764
								35.3958	276.856
								171.217	276.856
								19.1156	276.993
								251.886	277.404
								89.3127	277.496
								388.119	278.045
								399.78	278.365
								109.709	278.456
								192.939	278.548
								72.5751	279.005
								364.613	279.096
								374.811	279.096
								283.852	279.645
								292.953	279.645
								134.175	279.828
								301.413	279.828
								140.531	280.057
								218.32	280.148
								244.158	280.24
								180.866	280.697
								312.343	280.697
								413.546	280.788
								66.5386	280.88
								148.168	281.017
								229.89	281.017
								201.719	281.2
								327.891	281.2
								10.8382	281.337
								209.448	281.337
								352.129	281.337
								163.808	281.52
								92.2394	281.977
								116.385	281.977
								188.778	282.069
								267.755	282.069
								256.551	282.16
								274.112	282.389
								344.08	282.389
								1.64632	282.709
								157.772	282.709
								33.3836	282.801
								79.7549	282.801
								99.968	282.892
								54.3742	283.121
								26.4325	283.349
								45.4566	283.349
								398.18	283.532
								223.945	284.401
								126.126	284.584
								336.9	285.224
								317.419	285.544
								367.174	285.773
								380.711	285.865
								418.53	285.956
								428.134	286.093
								237.298	286.596
								177.574	286.733
								197.284	286.825
								404.216	287.054
								297.389	287.145
								113.413	287.236
								282.16	287.465
								106.004	287.877
								213.564	287.877
								62.7429	288.197
								242.054	288.197
								311.291	288.517
								187.954	288.746
								249.234	288.746
								332.967	288.746
								150.684	288.837
								72.6666	288.929
								163.077	289.157
								19.0241	289.249
								82.4073	289.249
								291.672	289.386
								357.662	289.477
								140.76	289.569
								205.332	289.66
								323.684	289.66
								377.327	289.797
								132.163	290.3
								123.702	290.529
								347.464	290.621
								91.5992	290.758
								390.771	290.941
								260.347	291.169
								30.2282	291.261
								100.608	291.261
								8.32304	291.398
								43.856	291.581
								270.225	291.81
								230.393	291.993
								219.92	292.13
								57.5296	292.77
								183.93	293.502
								174.418	293.913
								413.454	293.913
								38.597	294.005
								280.057	294.005
								158.092	294.142
								193.442	294.142
								338.181	294.142
								65.5783	294.645
								254.95	294.965
								166.872	295.102
								210.82	295.377
								115.974	295.697
								366.122	295.697
								16.8747	295.834
								24.4204	295.925
								307.038	296.245
								202.223	296.337
								427.082	296.474
								287.877	296.566
								77.9714	296.657
								50.2126	296.794
								387.067	296.886
								132.391	296.977
								147.62	297.389
								142.772	297.709
								239.173	297.846
								299.63	297.846
								404.537	297.846
								222.893	298.486
								104.312	298.578
								87.4834	298.669
								229.89	298.806
								121.141	298.989
								171.034	298.989
								6.631	299.127
								359.446	299.218
								94.8004	299.401
								245.438	299.538
								316.138	299.63
								257.603	299.858
								348.836	300.178
								60.7308	300.27
								157.909	300.361
								332.556	300.361
								420.954	300.498
								268.944	300.59
								326.291	300.59
								36.4476	301.093
								43.4445	301.093
								188.183	301.55
								150.684	302.373
								281.017	302.373
								29.4965	302.694
								115.745	302.694
								197.146	302.831
								376.503	303.014
								289.889	303.334
								68.9624	303.425
								212.421	303.654
								176.613	303.745
								13.8108	303.883
								220.881	304.065
								409.933	304.065
								250.514	304.203
								127.635	304.523
								266.612	304.523
								398.729	304.523
								109.206	305.026
								203.412	305.117
								78.383	305.346
								163.305	305.346
								384.644	305.346
								133.763	305.437
								236.109	305.437
								310.971	305.666
								142.132	305.758
								301.322	305.895
								87.4834	305.986
								244.89	305.986
								98.5961	306.306
								340.833	306.306
								54.0541	306.809
								0.91462	306.947
								355.421	306.947
								227.42	307.267
								415.969	307.45
								275.301	307.587
								182.558	307.678
								375.863	308.227
								67.8191	308.959
								152.193	309.142
								168.793	309.142
								324.736	309.599
								23.6429	309.919
								121.599	310.102
								422.555	310.559
								364.293	310.651
								113.23	310.742
								283.944	310.742
								315.956	310.834
								336.169	310.834
								7.45415	311.062
								406.64	311.291
								81.9042	311.382
								190.698	311.382
								258.152	311.611
								47.4688	311.794
								217.817	311.931
								198.976	312.343
								308.41	312.343
								241.963	312.434
								294.782	312.434
								60.4107	312.526
								36.7677	312.754
								102.849	312.754
								92.5596	313.166
								74.2672	313.715
								206.887	313.715
								30.5483	313.806
								175.973	313.943
								397.54	313.943
								386.244	314.126
								251.155	314.264
								353.638	314.538
								129.099	314.675
								228.929	314.675
								156.949	315.087
								148.031	315.178
								268.807	315.178
								347.784	315.407
								15.4114	315.635
								375.314	315.727
								164.357	316.047
								221.933	316.367
								116.065	316.55
								107.056	316.687
								139.891	317.007
								86.02	317.51
								54.1455	317.739
								416.518	317.968
								341.108	318.471
								183.519	318.562
								406	318.562
								329.812	319.02
								259.203	319.111
								370.238	319.202
								196.643	319.34
								121.37	319.431
								280.057	319.66
								287.557	319.751
								168.153	320.163
								383.272	320.391
								4.48164	320.483
								295.102	320.574
								393.332	320.574
								35.2129	320.712
								206.155	320.712
								235.469	320.712
								175.561	320.803
								42.7128	320.894
								71.2032	321.032
								244.798	321.352
								322.587	321.352
								25.0149	321.443
								215.256	321.443
								16.143	321.763
								189.098	321.855
								130.699	322.175
								268.944	322.175
								100.197	322.404
								312.663	322.907
								362.418	323.044
								79.572	323.135
								145.059	323.455
								61.0052	323.867
								426.122	323.958
								90.6846	324.096
								158.092	324.096
								251.155	324.279
								114.282	324.324
								305.575	324.507

## Sheet: DN2
Red		Green		Blue		Violet		Double
X	Y	X	Y	X	Y	X	Y	X	Y
252.847	0.731696	2.0579	1.00608	167.01	1.09754	13.7193	1.09754	9.05474	0.731696
286.276	0.503041	177.482	1.09754	209.357	1.73778	65.3496	1.09754	186.583	0.594503
313.943	0.685965	268.715	1.09754	279.005	2.46947	349.385	1.23474	273.289	0.91462
324.507	0.503041	297.617	1.09754	31.6001	3.01825	406.549	1.41766	35.9446	1.09754
393.195	0.548772	41.5695	1.23474	139.159	3.10971	288.929	1.64632	124.343	1.09754
48.9779	1.3262	203.091	1.23474	384.415	3.10971	101.02	1.73778	258.334	1.3262
20.9905	2.28655	218.777	1.55485	198.015	3.33836	193.579	3.01825	59.8619	1.55485
424.018	2.92678	380.848	1.96643	314.035	3.8414	150.592	3.8414	145.287	1.64632
4.61883	3.01825	246.582	2.28655	122.01	6.17369	323.958	4.39018	241.094	1.64632
301.002	3.01825	310.331	2.37801	246.902	6.72246	270.087	5.76211	96.5839	1.73778
112.59	4.80176	428.134	2.37801	260.575	6.81392	383.592	6.31088	180.226	1.73778
38.4598	6.40234	229.25	2.78959	92.5596	7.13404	394.156	9.69497	318.151	1.73778
178.625	6.40234	401.381	2.78959	60.5021	7.36269	81.6756	10.1066	83.0475	1.87497
154.205	6.631	416.289	3.9786	183.061	7.59135	423.058	10.198	356.29	1.87497
238.35	6.72246	391.503	4.07006	399.872	8.00293	214.616	11.387	52.5449	2.0579
341.245	7.13404	48.2005	4.61883	329.675	8.18585	113.962	11.8901	173.458	2.0579
374.354	8.18585	26.2039	4.93895	346.824	8.82608	240.042	13.3077	329.172	2.0579
96.5839	8.32304	106.004	4.93895	416.838	8.82608	362.601	13.3992	343.669	2.0579
200.759	8.32304	186.583	5.25907	44.9536	9.1462	35.3043	13.9022	71.3861	2.14936
220.012	8.41451	373.714	5.25907	229.57	9.2834	55.2888	14.2223	283.944	2.14936
132.163	8.96328	350.986	5.76211	105.822	9.78644	400.009	16.3717	117.117	2.37801
166.872	10.6553	363.882	5.76211	157.04	10.9754	257.694	16.4632	90.4559	2.78959
356.565	10.7468	129.602	6.17369	12.9876	11.387	182.558	17.515	378.058	2.78959
319.843	10.8382	12.2102	6.40234	367.174	12.0273	313.074	17.9266	215.988	3.10971
67.1789	11.2956	146.888	6.40234	194.494	12.3474	339.141	17.9266	295.102	3.10971
277.633	11.387	171.125	6.72246	303.745	13.4906	7.27123	18.0637	336.169	3.10971
388.348	12.2102	283.029	7.04258	59.2217	14.9998	133.535	18.4753	234.326	3.33836
415.741	12.2102	86.6603	7.27123	75.0903	15.2742	162.116	19.1156	226.186	4.16152
402.936	12.6675	319.843	7.36269	139.983	15.4114	104.221	22.271	251.978	4.16152
308.41	12.8504	72.9867	8.09439	171.628	16.143	69.6941	23.0027	203.503	4.39018
143.915	13.1705	268.304	8.73462	379.339	16.6918	377.418	23.2314	419.994	4.39018
51.9047	13.3077	116.065	8.82608	284.264	17.0119	418.073	25.6551	264.371	4.48164
290.118	13.8108	337.632	8.82608	120.638	17.9266	204.555	26.8441	395.528	4.48164
332.007	14.1309	297.297	10.3352	409.841	18.0637	121.462	27.027	43.7646	4.71029
7.77427	14.3595	407.921	10.7468	322.175	18.2467	270.316	29.9995	403.805	4.71029
25.0149	14.451	253.807	10.8382	26.8441	19.9387	362.007	29.9995	2.14936	4.93895
254.127	14.6797	311.382	11.1584	43.6731	20.1674	31.9202	32.7434	307.358	4.93895
41.7524	15.4114	162.985	11.7986	211.232	20.579	344.537	34.1611	410.344	4.93895
84.6481	15.8229	5.25907	12.0273	239.173	21.3107	187.223	34.6641	164.357	5.03041
116.706	16.5546	199.707	12.3474	256.46	21.6308	230.713	34.6641	17.8351	5.25907
192.939	17.0119	62.9259	12.4388	354.461	22.4082	144.967	36.036	369.095	5.67065
215.988	17.2863	207.207	12.5303	391.64	22.4082	248.822	36.1732	389.811	5.67065
265.743	17.8351	138.291	12.6675	272.648	22.4997	51.4931	36.2647	427.402	5.67065
205.332	18.3839	428.042	12.759	426.35	22.9112	8.73462	37.408	64.938	5.85357
350.025	20.7161	32.7434	12.9876	95.8522	23.3228	301.413	37.7281	108.977	5.99076
229.57	20.9905	99.8765	13.1705	338.821	23.963	88.5352	37.9567	135.547	6.08222
157.589	21.6308	89.9072	13.9022	190.927	24.6033	391.183	38.6884	195.774	6.40234
182.558	21.9509	44.8164	14.1309	82.1786	24.9234	166.781	39.9689	158.961	6.4938
388.028	22.9112	322.907	14.6797	11.387	25.5636	16.4632	40.289	31.5087	6.81392
279.965	23.2314	355.101	14.9998	310.651	26.4325	112.773	41.2494	276.993	6.95111
363.379	23.46	391.823	14.9998	151.095	27.027	132.163	44.8164	76.7824	7.13404
19.6186	23.6429	124.526	15.1827	223.396	27.9874	210.408	44.8164	101.248	7.13404
414.917	23.8716	176.522	15.2742	364.613	27.9874	279.828	45.4566	210.82	7.13404
372.891	24.1917	275.163	15.4114	163.305	28.4447	318.699	45.7767	289.157	7.27123
314.264	24.7405	244.569	15.5943	300.178	28.5362	429.826	47.3773	301.23	7.36269
60.0905	24.9234	232.085	15.7315	112.361	29.9081	73.947	47.8804	361.229	7.36269
221.064	24.9234	16.6918	16.3717	56.1577	30.1367	190.287	49.8925	7.77427	7.45415
260.347	24.9234	370.787	16.3717	22.271	30.8684	412.677	50.9901	125.394	7.86573
301.55	25.2435	151.004	17.0119	394.887	31.6916	35.533	51.7218	50.8529	8.09439
138.199	25.6551	343.669	17.1034	285.865	32.3318	257.191	52.5449	24.1917	8.18585
30.8684	26.2953	384.552	17.2863	133.032	33.2007	336.352	53.0937	149.952	8.18585
76.7824	26.524	294.233	18.2467	378.195	33.2007	389.72	54.1455	140.623	8.32304
327.068	26.6154	52.1334	18.7954	423.058	33.2922	370.787	54.7858	190.058	8.32304
196.003	26.7069	425.39	19.2985	173.961	35.2129	163.9	54.8772	316.276	8.32304
173.229	27.2557	362.921	19.6186	403.988	35.3043	233.777	55.1973	333.928	8.50597
6.72246	27.4843	223.396	19.9387	84.328	35.3958	351.397	56.0662	235.698	8.73462
109.617	27.4843	415.329	20.1674	242.237	35.9446	53.0937	56.1577	325.788	8.73462
403.393	27.5758	266.703	20.2588	354.049	35.9446	291.993	58.7186	351.717	8.82608
242.877	29.3593	85.8828	20.396	65.9898	36.036	137.788	59.8619	242.694	9.2834
347.464	29.4965	107.605	20.396	322.495	36.036	16.2345	60.0905	272.74	9.2834
45.5938	29.9081	330.772	20.4875	201.399	36.3562	96.2638	60.4107	38.3683	9.78644
430.695	30.6398	191.018	20.579	258.014	38.0482	217.588	63.5661	172.726	10.1066
209.86	31.9202	405.177	21.1277	41.9811	38.7799	273.289	65.3496	87.0718	10.3352
92.148	32.0117	39.2372	22.1795	275.484	40.0604	227.74	65.8069	57.9412	10.4267
251.978	32.4233	63.9777	22.271	410.893	41.0207	35.533	66.8587	256.871	10.6553
67.9106	32.7434	316.779	22.4082	153.976	41.1122	406.869	66.8587	93.6114	10.8382
234.646	32.8806	147.391	22.9112	334.019	41.1122	307.77	67.1789	264.828	10.9754
311.291	34.4355	198.198	23.3228	122.01	41.7524	82.7274	67.5904	178.763	11.0669
417.433	34.4355	305.117	23.46	188.778	42.164	110.166	68.6422	249.371	11.387
125.166	34.5726	92.3766	23.5515	3.65848	42.3012	377.967	69.191	281.109	11.4785
183.061	34.5726	214.753	23.5515	229.981	43.353	251.063	69.3739	71.3861	11.7071
360.177	35.3043	74.1757	23.8716	307.129	43.856	190.287	70.5629	374.354	11.7071
297.938	35.3958	252.527	23.8716	98.5046	44.0847	58.8101	71.5233	396.305	11.7071
156.217	35.533	398.591	24.2832	216.445	44.1762	426.122	73.3068	18.704	11.7986
105.044	36.036	27.5758	24.4204	30.5483	44.8164	26.6154	74.0385	120.318	11.7986
280.24	36.5848	118.306	25.0149	391.503	45.6853	362.738	74.2672	380.391	12.0273
386.015	36.6763	158.412	25.6551	202.131	47.1487	148.26	74.3586	420.725	12.5303
332.785	36.9964	129.419	26.2039	425.39	47.3773	325.879	74.5873	219.372	12.759
170.714	37.225	166.552	26.2953	289.066	47.6974	167.193	74.7702	132.894	12.8504
265.743	37.408	1.96643	26.4325	346.961	48.109	393.744	77.6513	339.873	13.0791
222.573	39.1	294.005	26.524	168.061	48.2005	208.899	78.383	349.705	13.3077
346.092	39.2372	15.2742	26.9356	47.0572	48.3377	232.634	78.7031	78.383	13.3992
373.531	39.4201	183.701	26.9356	254.219	48.3377	92.4681	78.7945	104.861	13.4906
138.611	39.6488	386.015	26.9356	377.555	48.8407	288.197	79.0232	197.284	13.4906
323.867	40.0604	235.057	27.027	14.451	49.3895	118.946	80.4866	1.3262	13.7193
27.6673	40.289	281.017	27.027	324.096	50.1212	262.587	81.9957	202.543	13.7193
401.473	40.9293	49.8011	27.3471	65.2582	50.4413	35.7159	82.3158	29.9995	13.9022
197.604	41.3408	344.4	28.5362	142.772	50.67	184.89	84.1908	48.109	13.9022
58.5814	41.8896	245.941	29.2678	80.3951	50.7614	15.2742	85.3798	327.251	13.9022
12.0273	42.0725	84.831	29.6794	298.898	51.3102	50.7614	85.6999	111.081	14.0394
71.7062	42.8042	351.489	29.6794	358.897	51.3102	61.0052	86.1115	297.846	14.0394
292.77	43.1243	327.48	29.9081	113.962	52.2248	351.946	86.4316	407.6	14.0394
149.723	43.6731	420.634	29.9081	128.779	53.1852	315.178	87.895	311.611	14.2223
260.027	43.7646	40.6091	30.7312	240.774	53.8254	415.009	89.084	166.781	14.451
207.116	44.3133	369.415	30.8684	180.958	54.5571	369.918	90.4559	227.969	14.5425
42.3012	44.6335	103.992	31.0514	272.328	54.5571	139.48	91.0962	413.134	14.5425
244.066	44.7249	142.452	31.28	25.6551	54.6943	85.0597	93.6114	210.18	15.0912
89.1755	45.2737	412.494	31.6916	2.0579	56.7065	110.578	94.1601	316.55	15.0912
117.026	45.3652	308.822	32.4233	412.814	57.0266	336.992	94.3888	64.6179	15.5028
176.522	45.4566	319.111	32.4233	381.031	57.9412	299.538	94.8918	188.183	15.5028
184.57	45.4566	261.078	32.5605	74.9989	58.1698	164.769	95.3034	367.083	16.0516
233.914	45.5938	153.565	32.7434	400.009	58.1698	391.823	96.1723	387.936	16.0516
357.754	46.0969	219.6	32.8806	155.897	59.3131	240.042	96.4924	12.0273	16.2345
306.215	48.109	401.061	32.8806	223.716	59.8619	277.313	97.0412	235.149	16.4632
418.85	49.481	201.948	33.2922	311.703	60.2735	126.538	97.9558	96.8125	16.5546
157.909	49.8925	118.626	33.3836	102.3	60.4107	21.5393	98.4131	146.568	16.6918
333.288	49.8925	336.26	33.6123	205.195	61.8741	72.255	99.1448	289.66	16.6918
272.328	50.2126	72.8952	34.0239	370.33	62.5143	41.1122	99.3278	250.743	16.7833
402.844	50.3498	7.59135	34.2525	60.8222	62.6058	140.12	99.6479	126.126	17.0119
387.479	51.3102	382.86	34.344	166.552	62.6058	196.095	99.968	270.316	17.2863
344.309	51.4931	269.676	35.3043	45.4566	62.8344	59.6332	103.672	156.309	17.4235
375.543	51.4931	192.482	35.3958	349.065	62.8344	225.225	104.13	356.702	17.515
135.775	51.7218	251.658	35.7159	252.298	64.6179	375.726	105.181	279.508	17.6064
100.928	52.4535	292.77	35.7159	123.702	65.0295	257.1	107.376	100.425	17.7436
30.1367	52.5449	94.8004	36.1732	417.433	65.9898	8.96328	107.514	39.3287	17.9266
294.553	52.865	210.591	36.6763	13.5821	66.6301	155.348	107.925	71.2032	18.1552
205.515	53.0022	134.815	36.7677	176.613	66.6301	416.061	109.526	114.053	18.2467
223.533	53.7339	16.6918	36.9964	331.687	66.6301	315.087	110.257	20.9905	18.3839
70.0142	54.1455	61.9655	36.9964	192.71	66.7215	356.473	110.257	243.838	18.3839
324.279	54.1455	27.3471	37.0878	27.2557	68.002	295.285	110.349	301.55	18.4753
284.172	56.0662	166.369	37.0878	293.685	68.7337	98.8247	111.629	90.4559	18.704
12.6675	56.2491	283.761	37.7281	264.28	69.191	138.748	111.721	261.627	18.704
174.601	56.7065	178.305	38.3683	92.3766	69.3739	393.424	112.361	335.391	18.8869
111.081	57.118	38.4598	38.6884	139.8	70.2428	31.28	112.91	141.263	19.1156
314.675	57.118	362.738	38.7799	229.661	70.3343	85.3798	113.093	325.376	19.1156
197.146	57.2095	112.361	39.0086	282.801	70.5629	333.105	113.87	373.622	19.207
45.045	57.9412	126.858	39.9689	74.2672	71.066	189.235	114.373	175.653	19.4357
430.786	58.0784	306.626	40.0604	156.812	72.1635	206.064	115.013	396.305	19.4357
147.848	58.1698	230.942	40.289	390.36	73.0782	170.165	116.065	401.564	19.4357
265.972	58.49	425.939	40.4719	113.321	73.3068	110.578	119.678	57.0266	19.6186
61.8741	59.0387	396.305	41.2494	355.33	73.3983	221.704	120.09	308.227	19.6186
84.7396	59.7704	416.701	41.3408	216.445	74.5873	372.159	120.73	343.897	19.6186
125.394	59.7704	328.12	41.4323	318.379	74.6787	242.054	121.05	421.366	19.6186
409.704	60.182	9.1462	41.7524	427.814	77.1025	283.029	121.69	383.455	19.7558
232.314	60.5936	80.075	42.0725	373.302	77.8799	307.358	122.742	81.0354	19.9387
259.386	60.5936	372.342	42.3926	48.3377	77.9714	418.21	123.474	151.095	20.1674
184.022	61.1424	103.809	43.0329	305.437	77.9714	59.7704	126.126	217.588	20.2588
26.2039	61.2338	315.407	43.2615	273.151	78.7945	40.6091	127.727	0.594503	20.4875
361.549	61.3253	382.22	43.856	198.107	78.9317	395.985	127.91	170.074	20.8076
248.274	61.6454	93.0169	44.3133	416.61	78.9317	210.5	130.059	295.605	20.8076
338.592	61.9655	240.454	44.4963	130.699	79.4348	155.348	130.242	13.9022	21.1277
209.768	62.1027	69.0538	44.6335	244.478	80.3037	103.581	130.379	7.27123	21.2192
388.439	63.3374	296.886	44.7249	342.708	80.3951	9.37486	131.111	193.991	21.2192
324.919	63.5661	348.653	44.9536	184.022	80.9439	261.536	131.934	202.68	21.4478
420.954	65.1667	221.384	45.045	2.60667	81.264	52.6821	133.214	110.486	21.768
374.583	65.2582	339.141	45.1365	22.7283	81.264	139.663	133.214	32.0117	21.8594
158.824	65.8984	255.682	45.3652	67.2703	81.4469	172.177	133.214	132.391	21.9509
350.986	65.8984	270.956	45.5938	100.928	81.5841	79.1146	134.403	49.298	22.0881
220.881	66.127	163.808	46.0054	332.327	82.9561	337.952	134.403	187.223	22.0881
76.7824	67.6819	198.198	46.0054	254.539	83.0475	325.239	135.638	161.293	22.4082
241.734	67.9106	50.67	46.417	83.5963	83.139	192.71	136.919	226.369	22.4082
43.6731	68.2307	143.275	46.417	146.156	84.0079	304.523	138.108	232.954	22.4082
133.443	68.4593	38.0482	46.8286	400.192	84.831	416.289	138.519	122.193	22.7283
106.004	68.8709	188.275	47.6974	165.409	85.3798	361.549	139.068	368.775	23.1399
301.55	69.191	409.841	48.5206	389.628	85.7914	107.193	139.48	407.921	23.5515
397.037	69.3739	20.579	49.298	296.337	85.8828	243.929	140.44	244.066	23.7801
205.927	70.0142	399.369	49.5724	358.806	86.02	54.8772	142.864	179.083	23.963
290.621	70.1514	5.76211	49.7096	230.21	86.4316	384.964	142.955	209.631	24.1917
314.446	70.1514	28.5362	49.7096	215.667	87.4834	229.432	144.876	285.682	24.2832
274.02	70.3343	108.748	49.8925	281.429	88.8554	35.7159	145.287	319.66	24.2832
364.11	70.4715	174.83	49.8925	42.8042	89.084	127.407	147.071	348.973	24.2832
54.3742	71.066	309.37	50.1212	120.318	89.1755	109.617	147.208	86.8432	24.4204
19.2985	71.2946	153.336	50.2126	319.98	89.4041	283.349	147.208	64.2063	24.5118
169.525	71.2946	124.434	50.3498	242.786	91.0962	88.8554	148.763	358.165	24.5118
4.80176	71.8434	58.8101	50.5328	92.8797	91.4163	263.548	149.083	330.772	24.6033
67.3618	73.3983	263.228	51.4931	105.273	91.5992	340.925	151.553	267.023	24.8319
151.095	73.3983	367.266	51.5846	179.266	91.8279	318.242	151.644	54.237	25.2435
124.022	74.3586	245.85	52.1334	190.927	92.2394	6.31088	152.284	255.591	25.2435
415.146	75.6391	88.6724	52.4535	268.304	92.6968	167.741	152.787	143.184	25.5636
181.278	75.7306	231.033	53.0022	29.1764	93.1998	401.244	155.668	276.261	25.6551
34.6641	76.1879	200.759	53.1852	379.659	93.337	181.689	155.897	41.8896	25.7923
191.979	76.1879	97.4528	53.3224	58.0784	93.84	145.836	156.309	24.4204	25.8838
229.021	77.011	283.852	53.4138	347.922	94.8004	344.629	156.72	249.966	26.1124
251.246	77.2397	355.33	54.0541	136.278	95.029	63.7948	158.824	35.6245	26.2953
334.98	77.4226	167.741	54.8772	73.6269	95.3034	366.946	159.052	393.973	26.2953
397.677	77.5598	385.055	55.1059	425.939	95.4406	391.823	159.281	425.39	26.4325
346.55	77.8799	424.338	55.1973	201.171	95.6235	302.373	159.921	100.517	26.7069
84.0079	78.0628	134.175	55.2888	157.132	95.7607	227.558	160.104	93.5199	27.3471
102.3	78.0628	42.3012	55.426	12.0273	98.4131	355.33	160.973	117.117	27.4843
264.508	78.383	342.297	56.0662	215.667	98.5961	23.46	161.065	413.866	27.4843
382.86	78.9317	121.599	56.7065	408.469	98.9162	253.578	161.796	68.9624	27.5758
312.983	80.3037	319.523	56.7979	258.975	99.1448	280.24	162.025	216.856	27.5758
26.2039	81.0354	65.3496	57.2095	330.955	100.288	47.2859	162.208	381.351	27.5758
141.355	82.0872	22.0881	57.4381	1.09754	100.928	75.319	164.449	229.341	27.6673
406.549	82.0872	144.876	57.6211	310.102	101.34	201.491	164.86	399.78	27.6673
362.281	82.3158	79.1146	57.8497	364.293	102.437	99.8765	170.577	127.635	27.9874
283.532	82.6359	302.922	58.1698	392.692	102.758	402.753	171.628	156.4	27.9874
298.486	82.8189	332.647	58.1698	70.7459	102.941	334.66	172.909	304.934	27.9874
10.7468	83.4591	406.96	58.2613	107.056	103.169	66.31	173.641	238.35	28.1246
220.149	83.6877	378.058	58.8101	117.117	103.169	153.336	173.778	314.264	28.1246
57.301	84.0079	10.5181	59.8619	187.223	103.352	122.513	174.921	200.759	28.3075
111.721	84.5109	106.965	60.182	90.6846	104.77	172.817	175.79	79.6634	28.4447
120.41	85.0597	279.508	60.4107	246.399	104.77	238.441	176.933	135.958	28.4447
273.289	85.0597	367.997	60.5021	283.532	104.77	352.54	177.802	3.10971	28.5362
374.674	85.0597	288.105	60.5936	45.045	105.181	218.777	178.305	289.66	28.5362
160.653	85.3798	190.195	61.3253	300.91	105.593	3.33836	178.945	169.342	28.7191
43.7646	85.7914	175.47	61.4625	346.001	105.913	197.695	179.357	340.376	28.9477
92.0565	86.1115	35.533	61.5539	26.2039	106.004	27.3471	179.906	374.263	29.1764
238.762	86.5231	262.816	62.2856	148.763	106.553	310.651	180.134	192.71	29.2678
72.9867	86.8432	398.912	62.8344	324.599	106.736	46.0969	180.226	264.6	29.9081
204.372	86.9804	200.439	62.9259	174.098	107.285	264.828	182.009	61.5539	29.9995
0.685965	87.392	54.1455	63.0173	55.0144	107.514	143.824	183.061	107.834	30.1367
323.227	87.4834	229.021	63.0173	229.57	107.605	101.797	184.89	87.3005	30.2282
422.234	88.0322	415.741	63.246	203	108.657	423.286	186.171	331.916	30.2282
339.964	88.6724	132.391	63.9777	130.562	108.977	381.031	186.491	184.799	30.3197
130.15	88.8554	358.714	64.1149	381.031	109.526	331.413	187.223	388.759	30.3197
176.11	90.0444	155.028	64.2063	269.127	109.617	83.3676	187.406	406.549	30.4569
248.411	90.0444	427.493	64.435	425.619	110.349	252.847	189.738	278.548	30.5483
263.959	90.2273	77.5598	64.938	218.137	110.761	166.69	190.927	323.958	30.5483
78.6116	91.1876	93.1998	65.5783	402.204	111.309	357.342	191.339	17.515	30.6398
400.741	91.3248	240.225	65.6697	159.693	113.87	228.198	192.07	295.194	30.7312
35.2129	91.5078	322.175	65.6697	255.591	115.105	290.758	192.619	51.4017	30.8684
152.604	92.6968	212.832	65.8069	95.212	115.242	3.74994	192.71	10.6553	31.1885
304.843	92.6968	146.476	66.127	109.617	115.425	122.01	192.939	177.802	31.1885
19.0241	93.1083	18.8869	66.2185	312.023	115.425	410.664	193.899	149.403	31.28
388.576	93.5199	117.437	66.5386	238.441	115.654	186.994	194.311	96.7211	31.3715
101.889	93.84	339.004	66.6301	69.191	115.882	72.0263	195.043	26.8441	31.6001
355.65	94.7089	3.33836	66.8587	298.898	115.882	33.9324	195.454	245.21	32.0117
374.674	95.212	297.389	66.8587	16.4632	116.797	268.807	196.506	357.342	32.1489
284.081	95.9437	254.219	68.2307	367.586	116.934	207.756	200.53	215.256	32.3318
221.521	96.7211	102.3	68.7337	280.56	117.574	143.504	201.308	366.443	32.3318
211.46	97.0412	387.479	69.191	416.838	118.077	388.668	201.948	257.374	32.4233
191.659	97.8644	69.2825	69.3739	340.925	119.449	311.062	202.68	140.531	32.5605
51.7218	98.4131	181.506	69.6941	211.46	119.678	430.466	203.915	204.875	32.6519
415.329	98.4131	310.422	69.6941	143.504	119.77	12.759	204.052	224.676	33.3836
5.25907	98.8247	158.504	69.8313	123.382	120.41	54.0541	204.372	350.665	33.3836
232.314	98.8247	33.0635	70.6544	42.3926	120.501	34.1611	204.692	429.094	33.7038
327.48	98.8247	352.86	71.2032	194.22	121.141	242.054	205.332	39.2372	33.8409
177.162	98.9162	199.067	71.8434	55.426	122.102	286.596	205.744	374.354	33.8409
117.986	99.0534	94.8004	72.3465	265.88	122.193	98.4131	206.064	198.107	33.9324
146.659	99.2363	131.431	72.3465	29.8166	122.422	167.65	207.756	113.962	34.1611
131.843	100.105	286.596	72.5751	355.742	122.742	220.332	209.036	315.956	34.2525
254.31	100.608	49.8925	72.8952	380.208	123.382	78.1543	209.768	274.843	34.344
88.5352	100.928	240.454	73.0782	181.506	123.474	401.884	211.232	161.065	34.4355
315.498	100.928	373.211	73.2153	299.858	123.702	123.062	213.564	47.4688	34.8928
401.473	100.928	420.542	73.2153	163.488	123.885	182.238	213.792	398.409	34.9842
34.4355	101.248	84.7396	73.3068	81.0354	124.022	368.226	214.433	305.575	35.2129
67.2703	101.248	331.916	73.947	234.097	125.715	197.924	215.256	287.694	35.3043
350.117	101.797	172.406	74.2672	107.056	126.035	271.048	216.628	120.638	35.3958
162.208	103.169	410.985	74.3586	324.827	126.218	158.504	217.588	2.92678	35.533
425.07	103.261	97.9558	74.4501	403.073	127.407	425.481	218.64	412.265	35.8531
207.207	103.992	42.0725	74.5873	19.4357	129.099	336.352	219.372	328.44	36.036
388.668	104.45	274.02	74.6787	248.502	129.419	140.852	222.161	56.7979	36.2647
289.889	104.77	189.326	74.7702	90.7761	129.51	52.362	222.801	71.066	36.3562
366.214	105.364	120.501	75.4104	367.494	130.471	350.757	223.716	420.862	36.3562
17.1034	106.462	381.9	75.4104	122.651	130.699	312.023	224.905	236.246	36.6763
78.9317	106.553	401.381	75.5476	0.548772	130.791	256.46	225.317	381.991	36.6763
304.523	106.645	364.11	77.011	133.763	130.882	100.928	227.237	78.1543	36.9964
120.09	107.376	58.9015	77.1025	221.933	131.522	76.5994	227.878	31.6916	37.3165
239.082	107.376	139.251	77.2397	314.538	132.163	382.86	228.289	149.632	37.3165
265.331	107.376	224.585	77.3311	149.723	132.483	232.634	228.381	20.7161	37.408
336.9	107.514	308.547	77.3311	204.783	132.574	30.1367	229.341	130.15	37.408
220.561	108.154	14.5425	77.4226	290.941	133.032	120.501	229.341	12.1187	37.6366
279.005	108.748	26.2039	77.4226	187.634	133.123	16.0516	229.753	182.147	37.8653
105.822	109.206	294.782	77.8799	274.112	133.214	399.46	231.993	294.142	37.8653
142.772	110.486	257.374	78.0628	70.3343	133.352	61.3253	232.222	339.324	37.8653
412.494	110.578	75.2275	78.1543	417.021	133.352	269.676	232.725	93.4285	38.1397
46.5084	111.858	159.601	78.4744	390.68	134.586	425.801	233.365	108.337	38.4598
128.23	112.041	338.501	78.9317	349.934	134.906	169.845	233.777	192.07	38.7799
230.804	112.041	350.254	79.1146	166.141	135.547	187.954	236.521	406.229	38.7799
197.467	112.681	110.669	79.4348	37.408	136.095	137.056	237.71	351.077	39.1
154.388	112.773	214.433	79.4348	333.699	136.416	251.566	242.786	99.5564	39.3287
378.698	112.91	7.27123	80.3037	113.962	137.147	348.653	244.569	358.257	39.3287
173.641	113.093	150.775	82.4073	234.966	137.467	224.814	244.707	211.46	39.4201
183.519	113.413	302.922	82.4987	52.4535	138.428	405.817	244.798	253.396	39.4201
89.7242	113.962	93.5199	82.6359	176.43	139.571	328.303	245.027	174.281	39.5573
249.051	113.962	321.992	82.6359	264.508	140.623	35.0757	245.21	218.548	39.5573
325.147	114.282	390.36	82.7274	283.441	141.903	306.809	245.438	245.118	39.5573
348.242	114.693	409.704	82.7274	305.895	143.047	9.78644	245.758	262.816	39.6488
391.64	115.882	175.15	83.2762	85.4713	143.595	92.5596	246.079	366.305	39.7402
57.7583	116.706	281.337	83.6877	197.055	143.687	368.866	247.771	225.225	39.8774
39.6488	116.797	40.4719	84.0993	13.0791	143.915	156.309	248.274	281.017	39.9689
404.125	116.934	239.813	84.1908	27.8045	144.007	56.7065	251.978	269.356	40.0604
113.093	117.117	69.8313	84.6481	342.525	144.007	134.586	252.298	142.955	40.1518
73.3068	117.986	198.015	84.7396	218.457	144.144	240.865	252.435	118.306	40.7006
362.51	118.169	29.4965	85.0597	369.415	144.144	284.172	254.859	320.391	40.7006
306.809	118.306	426.03	85.1511	135.227	144.556	394.476	257.603	159.373	40.7921
274.112	118.626	313.074	85.7914	408.332	145.196	203.732	258.243	235.698	40.9293
427.951	118.718	53.5967	86.1115	96.2638	145.608	172.086	258.334	311.611	41.1122
21.2192	118.809	124.526	86.1115	250.423	145.699	187.863	259.112	64.1149	41.2494
290.118	119.678	136.507	86.203	70.6544	145.836	267.984	259.844	386.656	41.2494
217.68	120.821	329.172	86.3401	144.236	147.071	72.758	260.575	201.491	41.4323
233.137	121.05	249.143	86.4316	163.168	147.071	331.687	262.039	53.4138	41.5695
185.394	122.422	370.787	86.4316	423.789	147.391	349.065	262.176	36.7677	41.7524
148.031	122.651	108.748	86.8432	323.776	147.528	307.678	262.359	286.596	41.9811
208.168	122.742	265.423	86.8432	381.671	148.489	416.93	262.496	343.669	41.9811
256.78	122.971	380.391	86.8432	392.875	149.403	34.9842	262.587	376.595	41.9811
135.227	123.062	291.169	88.1237	118.626	149.54	88.9925	262.587	45.7767	42.0725
98.8247	123.611	161.156	88.3523	54.6943	150.501	14.6797	262.816	76.0507	42.4841
10.9754	123.794	20.4875	88.6724	357.113	150.775	381.031	264.508	84.831	42.6213
392.052	124.205	355.101	88.7639	153.428	152.604	225.408	264.6	421.274	42.6213
125.394	124.663	186.354	90.0444	296.154	153.016	122.651	265.331	135.638	42.9414
411.305	124.846	99.5564	90.2273	336.672	153.016	62.5143	268.212	24.9234	43.1243
348.425	125.074	213.975	90.5474	186.034	153.428	158.824	271.048	168.793	43.4445
336.58	125.303	81.9042	91.0047	16.143	153.885	143.275	274.66	179.677	43.7646
241.414	125.806	8.82608	91.0962	271.779	153.976	262.816	276.764	398.591	43.9932
68.1392	125.897	345.681	91.1876	203.183	154.479	242.146	278.045	127.178	44.3133
317.19	126.538	205.012	92.0565	219.097	154.799	359.857	278.045	331.596	44.3133
161.293	127.178	225.225	92.2394	409.201	155.348	171.537	278.136	110.257	44.4048
32.5605	127.407	405.497	92.3766	288.425	155.988	304.203	278.685	301.733	44.4048
197.146	127.407	273.929	92.5596	245.941	156.08	80.4866	278.776	193.762	44.6335
370.147	127.407	170.714	92.7882	107.056	156.949	47.1487	278.868	7.45415	44.8164
1.3262	127.498	47.2859	93.0169	79.9835	158.412	216.628	279.005	17.1949	44.9536
270.087	129.327	258.975	93.1083	136.095	158.504	327.708	279.965	60.5936	44.9536
85.6085	129.419	67.2703	93.337	127.315	158.824	395.528	280.057	326.748	45.045
171.217	129.419	364.43	93.337	312.846	159.281	106.325	280.24	267.252	45.1365
328.44	129.602	147.94	93.6114	35.7159	159.464	192.939	280.788	250.423	45.2737
44.7249	129.922	308.09	93.84	92.7882	160.196	423.058	282.389	275.621	45.5938
299.858	130.242	414.917	94.3888	165.821	160.653	151.644	286.413	412.997	45.5938
111.538	130.562	115.425	94.8918	233.045	160.653	26.1124	286.596	102.209	45.6853
60.4107	131.751	125.486	95.4406	384.552	161.293	121.05	286.825	371.427	45.7767
424.567	131.751	396.076	95.6235	424.43	161.613	231.673	287.374	155.668	45.8682
231.125	131.934	181.278	95.7607	262.999	161.934	10.6553	289.066	405.588	46.3255
258.243	132.254	235.057	95.9437	193.899	162.116	61.1424	289.386	33.5208	46.417
387.159	132.254	383.455	96.2638	372.891	162.116	44.3133	290.3	205.744	46.8286
286.413	132.711	287.785	97.0412	65.4868	162.985	371.702	291.993	258.243	46.8286
355.513	134.266	324.187	97.2241	396.808	163.305	339.873	292.45	283.349	46.8286
182.558	134.403	371.93	97.5442	330.864	163.488	288.608	294.645	363.058	47.0572
218.228	134.906	26.1124	97.6357	177.345	164.677	254.447	295.102	93.7486	47.1487
341.976	135.044	37.408	97.6357	55.0144	164.769	98.5046	297.846	148.58	47.2859
405.405	136.095	57.2095	98.1845	359.217	164.997	171.354	298.258	313.074	47.3773
20.2588	137.056	99.5564	99.4649	3.56702	165.821	137.559	299.401	54.3742	47.4688
245.347	137.056	142.452	99.4649	346.961	166.141	387.799	301.322	229.25	47.4688
5.76211	137.467	198.838	99.4649	413.134	166.552	233.457	301.733	222.481	47.606
316.276	137.788	263.411	100.105	303.105	167.33	82.1786	302.282	294.462	47.606
374.994	138.199	341.565	100.105	147.208	167.741	38.2769	303.334	354.278	47.6974
141.355	138.519	86.5231	100.197	243.198	169.616	112.453	304.843	138.611	47.7889
90.1358	138.611	9.1462	100.517	277.084	169.754	430.878	305.758	382.54	48.0176
274.981	139.159	109.297	100.517	113.733	170.394	267.892	306.215	84.831	48.109
197.375	139.891	249.646	100.517	23.963	170.714	151.004	307.358	339.416	48.109
164.449	139.983	299.538	100.837	262.039	170.897	210.82	307.358	128.458	48.2005
259.615	140.531	157.269	101.157	317.739	171.125	11.0669	308.227	215.485	48.3377
330.772	140.943	273.929	101.34	217.817	171.537	64.2978	308.547	241.734	48.4291
77.4226	141.172	166.141	101.66	293.822	172.086	177.162	310.559	68.3221	48.6578
124.114	141.172	73.947	102.117	92.0565	173.458	253.075	310.834	119.266	48.6578
296.886	141.492	417.753	102.758	37.225	173.641	303.654	313.486	236.429	48.8407
99.5564	141.675	429.003	103.169	205.195	174.601	400.604	315.635	161.705	49.7096
153.016	141.675	182.33	103.352	364.842	175.15	351.717	315.818	41.8896	50.0297
30.2282	141.903	134.266	103.489	189.006	175.241	379.156	316.459	184.479	50.0297
206.567	141.903	353.409	103.489	376.915	175.653	95.029	319.202	178.625	50.1212
65.3496	143.687	217.085	103.809	428.682	175.881	230.073	319.202	392.555	50.1212
359.217	143.915	50.7614	103.901	388.576	176.933	336.58	319.202	319.02	50.4413
398.18	143.915	318.379	104.541	348.562	177.253	196.643	320.254	171.857	50.8529
426.35	144.007	404.948	104.77	134.586	177.985	144.236	323.135	22.0881	50.9901
45.7767	144.236	124.846	106.142	325.239	178.305	37.3165	323.867	251.658	51.4017
113.321	145.379	204.235	106.325	160.745	178.442	163.077	323.867	2.14936	51.5846
341.245	146.568	235.378	106.325	76.4622	179.083	425.801	323.867	419.582	51.5846
183.839	147.071	334.019	106.965	398.088	179.174			148.489	51.7218
269.447	147.071	194.082	107.376	276.352	179.677			196.963	51.7218
11.4785	147.528	308.41	107.697	227.74	179.814			329.904	51.7218
319.202	147.528	371.519	107.697	246.399	179.814			348.653	51.7218
232.954	148.489	388.028	107.697	13.9022	179.997			8.50597	51.8132
416.061	148.489	83.139	107.925	148.489	181.369			303.334	52.0419
224.676	149.312	3.8414	108.245	338.684	182.558			379.979	52.0419
170.577	149.54	291.672	108.748	414.277	182.65			313.486	52.362
79.3433	150.181	38.6884	109.068	59.3131	182.878			48.5206	52.5449
310.011	150.775	363.699	109.206	307.587	183.198			76.0507	52.6821
292.861	151.324	101.248	109.389	122.651	183.519			107.285	52.6821
351.717	151.553	397.86	110.029	366.214	184.479			289.066	52.6821
68.5508	151.964	110.166	110.578	177.665	184.799			399.78	52.6821
374.491	152.376	21.9509	110.989	213.655	185.531			278.456	52.865
280.24	152.467	213.472	111.218	107.925	185.714			406.96	53.0937
243.015	152.696	349.476	111.309	188.275	185.942			61.9655	53.1852
142.452	153.107	71.066	111.721	261.947	186.262			266.932	53.1852
32.0117	153.245	170.485	111.95	289.889	186.994			155.577	53.4138
390.68	153.245	246.079	112.041	354.69	187.863			86.02	53.7339
198.518	153.748	141.355	112.59	40.9293	188.183			17.7436	53.8254
126.355	153.885	423.606	112.91	93.1083	188.366			92.7882	54.0541
213.655	154.068	258.563	113.23	319.66	190.378			189.646	54.1455
253.899	154.068	285.453	113.413	238.67	190.79			124.526	54.3742
429.094	154.068	269.447	113.733	75.6391	192.07			32.0117	54.4656
94.8918	154.296	120.73	114.053	11.387	192.39			261.719	54.6943
158.001	155.257	303.883	114.282	429.734	192.482			138.611	54.7858
51.5846	155.897	224.905	114.922	133.946	192.802			212.603	54.7858
328.76	155.897	48.2005	115.882	198.747	193.351			218.548	54.7858
405.268	156.217	61.7826	116.385	220.149	193.442			101.66	55.0144
3.42983	157.269	152.787	116.477	54.237	193.762			208.259	55.426
299.401	157.36	339.873	116.614	402.204	193.991			226.689	55.426
172.909	159.373	321.123	116.706	150.043	194.403			117.574	55.6089
420.634	159.693	412.997	116.706	380.711	194.494			359.537	55.6089
112.27	160.836	180.455	116.797	419.994	194.494			245.438	55.929
238.03	160.836	6.40234	117.254	165.18	195.043			338.272	55.929
185.714	161.476	28.6276	117.254	336.489	195.271			366.534	56.3863
271.688	161.613	235.469	118.306	25.335	195.363			69.9227	56.7065
317.739	162.208	387.067	118.809	302.694	195.683			38.6884	56.8894
86.6603	162.345	190.607	119.449	275.712	196.232			186.034	57.118
343.257	162.345	200.759	119.449	354.049	197.924			307.77	57.118
259.523	162.757	295.925	119.449	364.293	198.335			202.863	57.2095
221.064	163.168	78.1543	119.587	241.414	199.479			325.559	57.301
205.744	163.305	162.025	119.907	184.799	199.616			297.114	57.6211
365.162	163.488	353.729	119.907	110.166	200.027			373.119	57.7583
38.9171	164.54	133.535	120.181	125.303	200.439			416.701	57.9412
15.4114	164.86	376.686	120.41	2.46947	200.53			57.301	58.0784
406.137	165.089	401.701	120.501	325.788	200.668			178.625	58.0784
150.364	165.318	329.995	121.05	259.112	201.491			389.308	58.0784
379.75	165.912	37.8653	121.141	43.2615	202.451			131.934	58.1698
100.425	166.461	102.758	121.782	289.889	202.68			160.333	58.49
60.2735	166.872	215.896	122.513	88.7639	203.183			170.897	58.7186
120.821	167.193	14.5425	122.651	229.661	203.503			424.658	58.7186
393.104	167.193	115.425	123.291	344.949	203.823			344.537	58.9015
299.218	167.421	260.347	123.291	76.3708	204.052			48.4291	59.2217
429.003	167.65	251.658	123.885	210.5	204.372			253.899	59.3131
137.056	168.702	289.477	124.022	65.8984	204.463			6.40234	59.6332
337.632	168.793	422.234	124.022	158.732	204.463			395.207	59.7704
71.3861	169.022	151.232	124.114	408.241	204.692			274.752	59.8619
179.266	169.022	64.8466	124.205	174.83	206.887			213.244	60.2735
287.236	169.525	360.818	124.205	193.991	207.436			81.0354	60.4107
4.39018	169.616	91.3248	124.343	22.9112	208.076			318.791	60.5936
273.151	170.165	224.356	125.394	141.812	208.168			88.4438	60.8222
224.585	170.485	314.538	125.715	375.726	209.036			112.361	60.8222
312.526	170.805	279.737	126.035	273.792	209.219			354.141	60.8222
43.6731	171.034	8.82608	127.315	391.823	210.408			332.876	60.9137
33.3836	171.766	168.153	127.315	250.194	211.232			283.121	61.0052
197.284	172.177	130.882	127.91	302.694	211.369			404.857	61.0052
326.199	172.269	48.2005	128.138	317.099	211.46			236.658	61.2338
354.37	172.406	346.824	128.55	234.417	212.421			150.501	61.4625
165.318	173.046	390.04	128.687	12.3474	212.512			196.232	61.6454
20.8076	174.098	23.5515	129.099	50.7614	212.741			12.6675	61.9655
419.673	174.189	107.056	129.19	419.673	212.924			67.1789	61.9655
233.777	175.058	238.67	129.19	110.669	213.381			119.129	61.9655
249.371	175.15	188.503	129.327	359.446	213.884			22.0881	62.1027
56.3863	175.881	201.079	129.739	96.2638	214.296			143.275	62.2856
87.0718	176.75	266.795	129.922	220.012	214.296			224.997	62.4228
214.753	177.07	431.289	129.922	333.288	215.073			382.311	62.7429
183.381	178.122	377.967	130.059	284.172	215.988			245.667	62.8344
335.208	178.763	35.9446	130.699	125.486	216.536			265.651	62.9259
314.858	179.266	179.586	130.791	259.935	217.68			30.2282	63.1545
374.354	179.266	357.845	130.882	163.808	217.908			39.9689	63.246
405.908	179.357	77.5598	131.202	64.8466	218.548			127.498	63.246
385.604	179.494	142.772	131.202	348.973	218.869			180.866	63.246
267.755	179.586	305.575	131.431	246.17	219.189			97.5442	63.4746
112.361	179.997	412.905	131.522	396.899	219.28			106.736	63.5661
151.324	179.997	335.208	131.843	36.1732	219.372			134.906	63.5661
301.23	180.134	227.237	132.391	205.744	219.509			290.849	63.5661
346.001	180.134	296.886	133.626	191.339	219.6			342.525	63.5661
204.372	180.455	215.164	134.815	301.322	219.829			363.241	63.9777
96.904	180.866	95.5321	135.044	410.024	219.829			259.295	64.2063
71.8434	181.049	247.222	135.227	5.44199	220.972			302.511	64.2063
360.177	182.147	121.462	135.867	378.195	221.521			410.344	64.435
131.431	182.787	401.701	136.095	179.814	221.841			400.101	64.6179
395.848	183.061	16.3717	136.416	150.181	222.024			231.993	64.7551
236.429	184.342	1.55485	136.827	134.403	222.344			310.834	64.7551
286.733	184.57	68.5508	136.827	20.8991	222.893			186.994	64.8466
7.36269	184.799	202.223	137.056	80.6238	223.213			73.7184	65.0295
224.814	185.211	382.723	137.467	110.578	223.396			48.9779	65.4868
256.871	185.394	149.403	137.879	428.134	223.945			57.9412	65.6697
36.6763	185.622	29.9081	138.199	318.699	225.225			163.168	65.6697
170.257	186.583	60.4107	138.291	415.969	227.009			199.387	65.6697
20.8991	186.994	365.985	138.428	160.196	228.792			425.801	65.6697
428.042	188.183	47.6974	138.611	245.667	229.432			371.702	66.127
155.76	188.275	256.139	138.931	227.969	229.57			63.7948	66.4472
51.173	188.686	268.212	138.931	337.312	229.57			278.045	66.4472
412.677	189.098	86.7517	139.068	272.968	229.753			391.503	66.5386
179.494	189.555	341.885	139.159	51.8132	229.89			86.4316	66.9502
383.592	189.646	161.293	139.342	195.134	229.89			96.0809	67.0417
327.48	189.738	281.109	139.571	391.503	230.073			170.805	67.0417
210.408	190.195	131.522	139.8	287.968	230.713			209.128	67.0417
247.542	190.287	322.266	140.211	365.162	230.713			286.596	67.0417
310.422	190.378	426.99	140.211	96.401	231.262			7.59135	67.8191
65.1667	190.698	410.161	140.531	137.788	231.902			357.845	67.8191
117.666	192.207	227.329	140.943	148.031	233.274			216.536	68.1392
346.001	192.207	173.366	141.263	216.765	233.365			237.938	68.1392
299.309	192.482	392.052	141.675	116.477	233.685			152.284	68.3221
264.92	192.619	105.593	141.903	41.8896	233.914			318.791	68.7337
277.953	193.122	375.223	142.772	306.398	234.326			325.788	68.7337
193.442	193.259	293.09	143.047	260.027	236.246			124.663	68.9624
364.202	194.814	315.407	143.367	408.79	236.429			23.3228	69.2825
93.1083	195.134	351.489	143.367	348.745	236.749			115.882	69.5111
374.994	195.134	332.785	143.595	381.259	236.841			336.031	69.5111
29.9081	195.454	186.354	144.464	179.357	236.978			348.562	69.6026
105.273	195.454	115.974	144.647	202.771	238.533			415.558	69.6026
156.217	196.003	41.2494	144.967	80.1665	238.762			146.248	69.9227
399.049	196.003	74.3586	145.059	7.86573	238.99			185.073	69.9227
285.362	197.695	274.112	146.476	322.266	239.31			382.86	70.0142
12.5303	197.787	201.719	146.659	26.2039	239.722			255.499	70.3343
232.405	197.787	239.722	146.659	223.305	241.826			221.841	70.4715
81.264	198.107	0.868889	146.888	292.861	242.054			36.2647	70.7459
334.66	198.427	420.542	146.888	240.225	242.146			298.029	70.7459
44.3133	198.656	360.498	147.071	362.007	242.146			15.7315	71.2946
61.5539	198.976	156.4	147.3	337.403	242.877			269.356	71.2946
175.561	199.159	148.58	147.391	426.03	243.198			44.8164	71.7062
140.211	199.296	214.844	147.391	103.032	243.335			100.517	71.8434
316.138	200.53	19.6186	147.62	128.138	243.929			107.605	71.9349
425.161	200.988	52.865	147.94	63.9777	244.066			175.881	71.9349
299.538	201.719	405.497	147.94	187.863	244.066			278.136	71.9349
217.817	201.948	92.6968	149.22	158.732	244.707			247.039	72.0263
73.2153	202.451	253.807	149.22	142.955	245.347			405.588	72.0263
194.311	202.863	344.858	149.632	393.653	246.079			367.083	72.1635
254.127	203.091	300.819	150.364	267.755	246.17			162.345	72.4379
350.757	204.143	397.22	150.364	46.6456	247.45			89.9072	72.5751
19.7558	205.424	326.84	151.232	209.357	247.954			29.9995	72.758
49.8925	205.652	222.801	151.415	412.265	249.874			303.745	72.758
359.446	205.744	234.097	151.553	172.817	250.606			211.369	72.8952
271.688	206.384	124.434	151.735	279.188	250.743			79.9835	73.0782
327.891	206.384	102.758	151.873	71.8434	251.383			194.631	73.0782
116.934	206.567	11.5699	152.056	196.323	251.658			136.095	73.2153
412.265	206.567	191.979	152.604	298.349	251.658			260.987	73.3983
379.659	206.887	313.715	152.604	236.429	251.886			397.357	73.5355
101.248	207.665	290.849	153.016	378.698	252.207			340.513	73.7184
9.55778	207.847	28.216	153.107	120.181	252.527			350.665	73.7184
86.1115	208.899	63.5661	153.336	331.184	252.755			231.582	73.947
35.2129	209.357	385.467	153.428	256.139	253.167			267.115	73.947
206.704	209.357	176.933	153.565	355.101	253.67			63.1545	74.0385
396.717	209.539	136.187	153.748	20.9905	254.95			128.458	74.1757
126.446	209.631	416.61	153.976	36.6763	254.95			70.8831	74.2672
243.106	209.951	277.724	154.708	314.446	255.088			377.647	74.4501
164.769	210.271	79.2518	154.799	86.4316	255.911			202.451	74.5873
260.347	211.049	264.828	155.12	227.237	256.322			313.303	74.5873
338.592	211.14	376.366	155.12	419.353	257.1			9.55778	74.6787
138.108	211.552	40.6091	155.577	368.546	257.191			53.0937	74.6787
148.672	212.1	358.897	156.812	98.5961	257.511			291.901	74.9989
431.061	212.283	334.477	157.269	405.497	258.975			388.439	74.9989
287.236	212.603	113.87	157.36	159.052	259.706			2.46947	75.0903
186.674	213.472	71.2946	157.772	182.65	260.027			20.2588	75.0903
299.309	213.792	252.527	157.772	5.67065	260.255			78.6116	75.7306
62.5143	214.433	168.153	158.504	59.6332	260.667			329.904	75.9592
228.381	214.616	345.361	158.961	242.694	261.078			358.897	76.0507
319.02	215.485	181.598	159.693	214.524	262.039			283.761	76.1879
351.626	215.667	6.40234	159.921	132.711	263.548			409.11	76.3708
367.403	217.085	58.1698	159.921	144.464	263.639			238.213	76.4622
419.445	217.177	89.084	160.013	283.761	264.28			114.465	76.7824
48.2005	217.68	213.061	160.013	297.938	264.28			322.266	76.7824
73.6269	218.457	306.809	160.013	271.276	264.691			154.479	77.011
10.4267	219.509	102.941	160.653	391	265.011			220.972	77.011
218.457	219.509	394.796	160.745	237.07	265.103			420.634	77.011
104.45	219.829	198.747	162.025	317.19	265.423			143.367	77.4226
384.003	219.92	321.123	162.757	23.0027	266.932			40.0604	77.7427
30.3197	220.149	414.186	162.757	254.63	267.892			123.062	78.0628
195.912	221.201	153.565	163.168	334.248	267.984			300.178	78.0628
236.018	221.201	28.1246	163.305	354.37	268.395			29.8166	78.1543
249.966	221.612	376.915	163.305	196.003	268.715			163.077	78.383
327.251	221.612	292.633	163.808	168.061	268.807			95.9437	78.4744
90.0444	221.704	121.782	164.129	409.704	269.036			169.845	78.6116
118.306	221.933	132.711	164.22	426.853	269.036			105.822	78.7945
393.973	221.933	242.877	164.769	44.9536	269.904			177.802	79.2518
276.124	222.024	144.647	164.86	366.122	270.407			401.244	79.3433
171.857	222.161	19.1156	165.18	77.011	271.139			187.543	79.572
407.28	222.481	278.456	165.729	306.626	272.1			267.023	79.7549
305.986	223.305	41.9811	165.821	114.693	272.74			227.74	79.8921
40.6091	223.945	233.457	166.369	211.643	272.74			278.548	80.075
289.98	224.356	334.888	166.781	153.245	273.06			193.031	80.3037
147.711	225.317	85.6085	166.872	91.4163	274.02			377.006	80.3037
130.791	225.957	68.4593	167.101	380.939	274.432			16.143	80.3951
420.314	226.277	309.279	167.33	321.443	274.523			52.362	80.4866
54.6943	226.78	350.117	167.33	132.071	276.124			86.8432	80.4866
363.241	226.78	402.936	167.421	270.956	276.535			203	80.4866
164.997	226.917	160.745	167.741	183.29	276.993			46.417	80.6238
343.44	227.969	210.18	167.833	292.953	277.176			62.1027	80.6238
66.8587	228.609	222.481	167.833	56.7065	277.404			73.3068	80.6238
109.068	228.701	389.491	167.833	35.3043	278.685			259.386	80.6238
263.639	228.701	423.058	167.833	409.521	279.325			369.507	80.6238
321.352	229.432	110.578	167.924	226.689	279.416			134.724	80.7152
208.259	229.57	174.601	168.382	339.644	280.057			347.281	80.7152
177.482	229.661	186.354	168.793	354.873	281.749			355.833	80.7152
375.955	229.661	268.532	169.342	161.293	282.16			249.371	80.9439
77.5598	231.262	325.468	169.936	243.518	282.48			336.809	81.3555
296.794	231.765	52.6821	170.074	25.0149	282.801			215.667	81.4469
224.036	232.725	370.558	170.577	286.276	283.212			325.971	81.9042
24.4204	232.954	358.257	171.034	95.212	283.852			308.227	81.9957
3.8414	233.274	250.743	171.446	141.263	284.264			233.685	82.6359
238.441	233.914	289.477	172.909	395.756	285.224			422.737	82.7274
337.312	234.646	63.7948	173.046	204.783	285.453			315.956	82.8189
355.833	234.737	30.2282	173.366	75.8677	285.865			128.138	83.0475
250.926	235.286	304.294	173.641	368.226	286.093			384.964	83.0475
90.6846	236.246	414.277	174.098	110.029	288.288			153.107	83.139
34.2525	236.429	239.813	174.281	259.203	288.425			292.541	83.139
369.095	236.658	131.934	174.418	174.418	289.249			393.744	83.4591
311.062	236.841	142.452	174.738	313.943	289.66			412.677	83.4591
400.421	237.07	95.8522	174.921	187.314	289.797			6.40234	83.8707
65.1667	237.481	12.0273	175.058	49.5724	289.889			24.1002	84.0993
126.995	237.481	393.012	175.058	327.16	290.3			285.544	84.1908
146.888	237.938	75.319	175.15	35.7159	290.438			78.383	84.328
12.8504	238.03	195.363	175.881	239.951	290.529			97.1327	84.7396
269.996	238.121	225.957	176.293	11.8901	292.13			115.745	85.1511
280.24	238.121	431.381	176.43	385.055	292.13			65.4868	85.6085
416.61	238.121	317.648	177.07	157.04	292.313			103.992	85.6999
55.929	238.441	48.2005	177.253	303.105	292.633			179.906	85.6999
103.489	238.441	105.684	177.665	278.227	293.273			343.669	85.8828
156.492	238.441	345.04	177.665	129.922	293.593			407.418	86.02
43.6731	238.67	402.616	177.802	430.283	293.822			252.435	86.1115
186.034	239.31	36.7677	177.894	363.562	293.913			47.4688	86.203
196.232	239.402	153.748	177.894	66.6301	294.645			148.763	86.203
234.097	241.323	280.56	177.985	230.073	294.874			172.269	86.203
216.628	241.505	22.8198	179.174	421.274	296.977			223.716	86.203
139.159	242.557	86.7517	179.266	400.741	299.218			242.877	86.203
354.873	242.877	271.688	179.266	215.896	299.401			363.562	86.203
111.401	243.015	119.587	179.906	354.141	299.401			36.1732	86.3401
332.967	243.335	369.278	180.866	340.376	299.63			143.504	86.5231
172.269	243.655	181.826	180.958	202.223	299.721			304.386	86.5231
302.511	244.066	383.134	181.918	93.5199	301.322			57.118	86.7517
256.322	244.249	170.394	182.009	289.797	301.322			208.808	86.8432
289.386	244.707	255.591	182.238	6.4938	301.733			258.655	87.0718
388.668	245.438	334.66	182.467	115.242	301.733			275.392	87.392
87.6206	246.079	420.862	182.65	269.996	302.282			269.036	87.8035
204.372	246.582	211.872	182.878	23.6429	302.831			193.031	88.1237
365.482	246.719	356.702	183.198	142.132	302.831			334.797	88.1237
401.884	247.13	110.669	183.29	370.01	303.242			30.5483	88.2151
22.0881	247.359	297.617	183.839	159.921	304.386			112.041	88.3523
78.6116	248.182	191.75	184.159	324.096	304.386			309.69	88.3523
2.14936	248.502	247.222	184.662	307.998	304.523			89.084	88.5352
320.894	248.594	160.516	185.073	252.207	304.614			126.446	88.6724
31.6916	248.731	52.865	185.622	175.79	304.843			135.455	88.6724
180.958	249.463	406.32	186.262	280.56	305.254			382.083	88.6724
420.954	250.926	282.572	186.354	189.738	305.666			14.8626	88.7639
229.25	251.063	318.059	186.354	54.6943	306.626			286.916	89.084
50.0297	251.978	69.5111	187.086	237.71	306.718			376.183	89.084
347.922	252.435	220.241	187.223	79.572	307.358			393.515	89.084
218.228	253.167	392.281	187.406	41.0207	309.69			230.073	89.3127
336.352	253.167	80.3037	187.726	385.695	309.69			198.838	89.4956
129.51	253.396	350.757	187.726	341.656	310.011			73.2153	89.587
163.808	253.578	205.652	187.863	106.873	310.559			219.372	89.7242
103.261	253.99	305.254	188.046	406	310.834			426.67	89.8157
150.912	254.31	24.2832	188.183	361.229	311.474			166.232	89.9072
309.37	254.447	272.237	188.366	91.3248	311.703			296.566	89.9072
65.8984	254.539	138.428	188.595	128.55	311.794			349.705	89.9072
249.646	254.767	235.469	188.778	262.267	312.846			327.388	90.0444
13.4906	254.859	100.105	189.006	421.366	313.303			358.897	90.4559
268.304	255.682	371.107	189.555	161.613	313.943			419.765	90.4559
117.895	255.819	3.01825	189.646	9.8779	314.126			157.589	90.6846
377.555	255.911	150.272	190.378	293.09	314.126			2.69813	90.8675
409.11	256.002	14.6797	190.515	220.789	314.767			62.5143	91.5078
41.4323	256.231	61.7826	190.79	23.5515	315.956			399.14	91.5992
192.939	258.655	341.656	191.018	151.004	316.687			53.5053	91.9193
364.522	258.883	418.53	191.11	202.131	316.687			185.714	91.9193
425.71	259.203	36.2647	191.339	242.466	316.779			279.325	92.4681
142.315	260.484	127.086	191.339	324.416	316.779			238.35	92.6968
297.846	260.895	183.61	192.07	281.337	316.87			411.442	92.7882
222.161	260.987	361.778	193.122	61.1424	317.968			22.271	92.8797
280.24	261.078	258.975	193.671	375.543	318.471			41.661	93.0169
206.887	261.307	285.682	194.082	40.1518	320.071			142.544	93.0169
77.3311	261.627	158.321	194.311	186.171	320.483			97.4528	93.1083
237.618	261.947	114.465	194.494	53.0022	320.712			213.792	93.1998
52.865	262.496	326.199	194.723	75.7306	321.535			175.47	93.4285
174.738	262.587	44.4048	195.134	121.782	321.855			369.095	93.5199
24.1917	262.679	174.601	195.134	220.652	322.266			130.699	93.6114
395.756	262.999	295.194	195.134	393.195	322.724			343.028	93.84
156.492	263.868	406.777	195.271	310.422	323.684			15.8229	94.0687
323.958	263.868	393.332	196.323	173.961	324.096			194.951	94.1601
93.1998	264.371	224.814	196.643	139.571	324.507			247.359	94.1601
313.486	264.371	306.718	196.826					318.791	94.1601
344.537	264.371	69.3739	197.146					79.6634	94.2516
258.152	264.92	20.9905	197.604					120.501	94.2516
375.863	266.2	236.429	197.604					255.911	94.7089
34.2525	267.435	246.079	197.604					271.048	94.7089
69.5111	267.435	317.099	197.695					33.5208	94.8918
247.542	267.984	425.619	197.695					331.275	95.029
359.446	267.984	215.073	198.015					8.64316	95.3034
419.765	267.984	88.7639	198.427					293.593	95.3034
185.942	268.075	143.367	198.656					207.527	95.4406
292.13	268.395	343.257	198.656					310.971	95.4406
107.925	268.624	106.325	199.296					89.587	95.6235
14.451	269.127	383.775	199.479					151.232	95.9437
134.724	269.264	56.1577	199.799					303.105	96.0809
280.468	269.676	373.119	199.799					68.6422	96.2638
86.02	271.139	267.435	200.119					263.411	96.2638
331.093	271.779	11.387	201.171					352.769	96.7211
193.991	271.917	79.9835	201.171					422.234	96.8125
4.80176	272.1	200.21	201.399					388.028	97.0412
148.489	272.42	336.352	201.399					112.453	97.1327
391.32	273.471	35.3043	201.719					227.237	97.1327
370.238	274.112	278.227	202.223					404.537	97.3156
21.5393	274.432	166.369	202.543					361.869	97.4528
400.512	274.66	184.799	203.32					170.165	97.5442
207.024	275.301	121.599	203.503					160.104	97.7729
304.523	275.301	360.498	203.503					63.246	98.093
168.382	275.392	133.763	203.732					378.516	98.093
235.378	275.392	415.969	203.915					102.849	98.4131
342.388	275.712	151.644	204.692					47.0572	98.5961
266.795	275.941	397.357	204.692					220.652	99.0534
222.984	276.261	302.053	205.104					184.662	99.2363
425.298	277.633	95.3034	205.652					77.9714	99.3278
122.742	277.816	233.137	206.247					136.736	99.4649
72.9867	277.953	252.527	207.024					345.772	99.4649
61.6454	278.227	4.16152	207.665					397.448	99.5564
99.8765	278.776	291.489	207.847					203.183	99.7851
42.7128	279.005	352.678	207.939					122.742	99.8765
385.284	280.56	324.919	208.488					235.149	99.8765
414.506	280.697	422.006	208.808					285.773	100.197
32.4233	282.069	106.462	209.86					29.8166	100.837
150.501	282.572	262.359	209.951					267.252	100.837
296.657	282.572	161.705	210.271					240.682	100.928
278.868	282.801	342.617	210.408					369.186	100.928
85.1511	283.121	367.586	210.408					305.666	101.157
117.666	283.349	26.2039	210.5					320.712	101.157
184.662	283.349	50.3498	210.591					83.4591	101.248
317.648	283.669	378.698	211.232					53.5053	101.34
377.418	283.761	89.587	211.369					294.005	101.477
249.051	284.721	196.323	211.369					338.684	101.477
358.806	284.721	224.265	211.46					152.696	101.569
257.191	284.904	175.79	211.643					95.3034	101.66
165.638	285.773	328.852	211.872					128.23	101.889
219.92	286.093	279.188	212.192					229.57	101.889
134.083	286.505	60.4107	212.421					5.25907	102.117
333.516	286.916	210.18	212.421					192.207	102.117
236.749	287.054	39.9689	212.924					142.955	102.209
71.8434	288.105	305.437	213.061					277.084	102.209
200.851	288.105	70.7459	213.152					211.872	102.3
101.157	288.746	135.547	214.113					412.494	102.437
409.11	290.209	17.1949	214.204					251.475	102.62
349.614	290.438	244.569	214.524					37.0878	102.849
21.9509	291.078	409.201	214.753					327.388	103.169
292.953	291.078	296.794	215.988					169.022	103.352
264.691	291.81	429.003	215.988					175.333	103.581
6.631	291.993	391.64	216.216					14.9998	103.809
142.132	291.993	147.94	216.628					360.498	103.992
422.417	292.13	356.153	217.908					383.683	104.13
388.576	292.313	33.2007	218.228					259.935	104.541
53.5053	293.502	314.355	218.32					421.914	104.541
368.638	293.593	226.506	218.457					102.117	104.633
38.0482	294.142	256.963	218.64					111.538	104.633
113.001	294.142	121.919	219.097					199.387	104.953
85.6999	294.325	80.7152	219.692					312.846	104.953
399.872	295.102	416.289	220.149					21.1277	105.044
180.958	296.154	108.748	220.332					75.2275	105.501
307.129	296.337	366.854	220.972					272.831	105.501
127.178	296.657	210.088	221.064					400.284	105.822
247.542	297.114	343.577	221.384					160.196	106.004
321.855	297.617	168.244	221.521					350.848	106.325
153.428	297.846	57.301	221.704					392.143	106.325
338.181	298.258	48.9779	222.024					67.9106	106.553
191.43	298.486	187.634	222.161					215.073	106.553
227.009	298.806	292.633	222.344					243.746	106.873
380.939	299.218	69.6941	222.664					87.392	106.965
26.2039	300.498	94.1601	222.801					138.108	106.965
280.88	300.681	322.907	222.801					407.097	106.965
62.1027	300.91	156.72	223.213					31.6001	107.056
102.437	302.053	382.723	223.533					183.29	107.056
313.395	302.282	279.737	223.853					376.503	107.514
72.9867	302.511	17.4235	224.265					208.899	107.697
211.14	302.511	199.387	224.356					287.877	107.834
357.342	302.694	266.063	224.356					342.205	107.925
430.466	302.694	220.241	224.585					49.8925	108.017
164.22	302.922	357.113	224.905					319.111	108.017
46.0969	303.014	391.412	224.905					94.8004	108.245
256.78	303.974	120.41	225.408					59.3131	108.657
414.186	303.974	247.862	225.865					223.396	108.886
1.23474	304.065	135.318	225.957					12.759	109.068
242.557	305.986	402.021	225.957					42.6213	109.206
347.784	306.947	308.822	226.506					250.514	109.206
15.2742	307.129	237.39	226.597					307.587	109.389
298.578	307.129	330.132	227.1					367.174	109.389
143.367	307.678	38.0482	227.558					190.378	109.526
394.704	307.77	87.8035	228.289					236.246	109.526
404.125	307.77	413.454	228.289					123.702	109.709
329.812	308.227	299.218	228.381					328.532	109.846
272.648	308.959	47.0572	228.518					299.95	110.166
374.171	309.142	180.958	228.792					25.5636	110.349
200.53	309.462	63.7948	229.341					148.9	110.486
226.048	309.69	372.571	229.432					3.10971	110.898
133.626	310.011	9.55778	229.753					279.965	110.898
27.3471	312.023	431.061	229.89					178.763	111.081
314.035	312.754	105.684	230.301					360.589	111.218
60.5936	312.983	142.544	230.804					64.938	111.309
172.177	313.806	153.016	230.804					79.0232	111.309
116.202	314.035	26.9356	230.942					408.469	111.858
185.211	314.126	167.741	231.125					337.541	111.95
46.5084	314.264	347.601	231.262					73.6269	112.041
209.219	314.264	254.63	231.765					265.103	112.178
81.264	314.355	277.176	232.954					36.7677	112.27
157.909	314.858	365.391	234.097					354.69	112.27
287.785	315.315	201.811	234.417					115.425	112.453
387.616	315.498	234.097	234.509					419.262	112.59
35.7159	316.367	128.23	235.149					372.799	113.001
90.5474	316.367	210.82	235.149					427.493	113.001
430.878	316.55	321.123	235.378					386.976	113.093
106.233	316.687	192.619	235.789					274.981	113.23
233.457	317.327	332.236	235.926					132.803	113.321
344.949	319.111	78.6116	236.018					317.007	113.55
69.9227	319.66	299.309	236.246					53.1852	113.642
139.159	319.751	341.016	236.841					20.0759	113.733
358.257	320.071	16.3717	237.161					143.595	113.87
245.027	320.391	286.733	237.298					201.628	113.87
417.661	320.894	46.9657	237.39					293.41	113.962
16.3717	322.084	69.3739	237.481					212.1	114.19
319.02	323.227	160.333	237.481					398.409	114.19
265.331	323.364	225.408	238.121					163.626	114.785
305.666	323.547	390.04	238.441					243.746	114.785
153.245	323.684	249.051	238.533					10.3352	115.013
277.313	323.684	111.629	238.67					44.0847	115.105
384.003	323.684	427.173	238.762					218.64	115.242
193.442	323.776	403.165	238.99					195.363	115.425
368.455	323.776	93.1998	239.493					126.126	115.654
397.357	323.867	266.52	240.134					259.203	115.974
209.357	324.279	412.905	240.362					285.133	116.065
49.8925	324.462	310.651	240.454					266.795	116.202
		35.0757	241.094					344.537	116.385
		357.845	241.734					229.112	116.477
		1.96643	242.557					380.391	116.477
		150.181	242.694					156.812	116.797
		178.534	243.106					137.559	117.254
		276.673	243.426					326.428	117.254
		55.8376	243.518					251.795	117.437
		164.449	243.655					25.5636	117.574
		24.5118	244.158					106.462	117.574
		381.031	244.569					32.5605	117.895
		371.107	245.21					85.4713	117.895
		118.077	245.347					334.248	117.895
		213.152	245.347					119.129	118.077
		285.544	245.941					185.073	118.077
		298.166	245.941					99.0534	118.169
		233.365	246.49					422.326	118.169
		41.8896	246.719					90.8675	118.489
		398.18	246.81					302.831	118.809
		138.291	247.954					151.095	118.946
		430.283	248.182					410.893	118.946
		12.6675	248.274					1.73778	119.129
		242.877	248.731					174.921	119.129
		419.582	248.731					48.8407	119.266
		316.276	249.051					358.577	119.266
		85.6085	249.143					205.012	119.358
		103.489	249.234					393.653	119.358
		346.961	249.234					62.7429	119.449
		75.6391	249.783					349.385	119.77
		199.799	249.966					69.6026	119.907
		257.831	250.194					236.841	120.181
		22.4997	250.423					312.023	120.181
		330.224	250.926					405.497	120.181
		111.309	251.155					278.365	120.41
		152.924	251.155					168.793	121.05
		189.098	251.475					293.593	121.05
		63.1545	251.566					6.17369	121.279
		307.129	251.658					74.9074	121.279
		360.498	251.658					319.202	121.279
		176.933	251.978					128.687	121.462
		126.538	252.207					367.403	121.599
		32.6519	252.938					386.656	121.69
		270.225	252.938					226.277	121.919
		387.067	252.938					198.976	122.01
		7.45415	254.127					344.309	122.102
		95.4406	254.63					396.579	122.102
		213.061	255.088					21.2192	122.33
		405.177	255.088					85.2883	122.742
		244.478	255.179					270.545	122.833
		160.973	255.682					45.6853	122.971
		322.266	255.682					95.5321	123.702
		48.4291	256.139					213.152	123.702
		288.929	256.139					247.359	123.794
		343.989	256.642					36.3562	124.022
		58.0784	256.78					110.029	124.205
		223.853	257.831					119.358	124.205
		114.785	258.792					141.583	124.343
		300.041	258.975					263.228	124.526
		138.931	259.112					190.515	124.983
		373.851	259.844					155.12	125.074
		128.047	260.164					219.829	125.074
		420.725	260.575					332.007	125.166
		337.129	260.987					374.811	125.166
		360.589	261.398					27.1642	125.303
		197.924	261.719					101.157	125.623
		233.685	261.856					303.745	125.806
		259.203	262.359					174.098	126.035
		276.673	262.496					426.259	126.035
		44.1762	262.587					184.25	126.218
		20.9905	262.816					54.0541	126.675
		29.9995	262.999					361.778	126.766
		411.213	263.411					286.093	126.995
		179.494	263.639					419.582	126.995
		384.003	263.639					226.78	127.178
		70.1514	263.868					255.362	127.178
		106.736	263.959					339.553	127.178
		165.638	264.828					138.199	127.635
		289.249	265.103					206.796	127.635
		247.222	265.24					12.3474	127.727
		305.437	265.24					63.6576	127.727
		79.4348	265.331					408.332	127.727
		148.763	265.331					148.489	128.138
		367.403	265.743					128.23	128.23
		325.239	265.88					164.997	128.23
		400.421	265.88					280.468	128.23
		117.895	266.292					294.782	128.23
		189.098	267.115					311.062	128.23
		204.143	267.435					95.4406	128.367
		93.5199	268.212					320.391	128.687
		215.347	268.532					214.844	128.779
		139.891	269.264					383.912	129.099
		275.804	270.225					352.769	129.19
		264.051	270.407					392.784	129.51
		50.0297	270.545					243.838	129.922
		11.1584	271.048					372.891	129.922
		317.419	271.048					72.8952	130.15
		232.634	271.276					82.3158	130.242
		60.0905	271.596					4.48164	130.471
		361.687	271.596					117.437	130.699
		339.416	271.688					344.4	130.882
		429.003	271.917					192.299	131.202
		102.941	272.008					401.061	131.522
		36.6763	272.1					31.28	131.843
		298.898	272.648					235.606	132.071
		350.574	273.06					15.5943	132.254
		407.418	273.151					429.186	132.254
		125.897	273.7					160.653	132.483
		374.263	273.7					199.296	132.483
		240.225	274.432					39.4201	132.711
		82.4073	274.523					64.2063	132.711
		177.345	274.843					253.075	132.711
		418.21	275.484					22.8198	132.803
		69.3739	275.712					319.111	132.803
		28.216	275.804					46.3255	133.123
		16.5546	276.444					378.836	133.123
		332.236	276.764					363.79	133.443
		251.566	276.856					310.239	133.535
		218.96	276.993					88.1237	133.626
		200.668	277.404					301.322	133.763
		164.037	277.633					154.388	133.855
		391.503	277.816					328.76	133.855
		112.361	278.136					261.307	134.083
		136.599	278.365					144.236	134.175
		383.592	278.365					178.625	134.266
		152.924	278.685					411.213	134.266
		190.287	279.096					278.365	134.586
		314.675	279.737					108.245	134.724
		277.313	279.828					422.555	134.724
		90.7761	279.965					126.538	134.815
		287.374	280.24					269.584	134.906
		144.967	281.84					386.564	135.227
		76.7824	282.389					207.436	135.455
		260.804	282.709					222.481	135.455
		3.2469	282.892					102.209	135.638
		10.5181	283.121					56.4778	135.775
		373.439	283.121					71.9349	135.867
		65.8984	283.532					229.89	135.958
		180.226	283.532					286.276	136.187
		227.969	283.761					294.325	136.736
		238.441	283.852					170.714	136.827
		405.817	284.172					10.0151	137.147
		28.8563	284.264					135.547	137.147
		41.5695	284.401					396.076	137.467
		322.587	284.401					183.381	137.65
		307.587	284.493					239.173	137.788
		129.19	284.813					119.77	137.879
		106.873	285.041					348.333	138.108
		208.808	285.362					354.781	138.108
		345.04	285.865					248.731	138.428
		169.342	285.956					370.787	138.428
		50.9901	286.413					33.2922	138.839
		295.514	286.596					220.332	139.068
		416.518	287.557					94.3888	139.159
		248.502	287.877					405.588	139.342
		362.921	288.288					82.7274	139.48
		336.352	288.608					16.7833	139.663
		384.323	288.929					42.8042	139.8
		269.996	289.066					192.71	139.891
		424.978	290.621					69.2825	139.983
		218.96	290.849					201.811	139.983
		197.604	291.078					337.22	140.12
		354.278	291.261					309.142	140.211
		119.907	291.489					2.46947	140.303
		91.5992	291.581					23.6429	140.303
		68.1392	291.672					271.459	140.303
		82.7274	291.901					421.594	140.44
		284.493	292.541					157.269	140.76
		146.751	292.633					148.031	140.852
		403.073	292.953					327.16	140.943
		18.5668	293.182					50.1212	141.172
		58.2613	293.685					139.8	141.172
		135.638	293.685					213.244	141.172
		376.183	294.005					301.093	141.172
		106.645	294.462					319.34	141.492
		238.35	294.462					127.315	141.675
		321.855	294.553					234.737	141.675
		161.796	294.645					61.3253	141.903
		209.768	294.782					108.886	141.995
		310.834	294.965					381.122	141.995
		4.39018	295.194					166.781	142.315
		173.138	295.605					180.637	142.315
		189.326	296.154					363.699	142.452
		42.0725	296.245					89.8157	142.772
		28.4447	298.258					413.728	143.047
		415.878	298.258					254.539	143.367
		76.5994	298.898					278.136	143.595
		329.995	298.898					224.265	143.687
		271.596	298.989					289.249	143.687
		245.53	299.401					262.679	143.915
		260.667	299.63					402.433	144.236
		347.464	299.858					392.784	144.556
		430.878	299.95					79.9835	144.647
		15.1827	300.681					346.961	144.647
		297.114	301.002					103.489	144.876
		150.684	301.093					245.347	145.287
		119.266	301.23					121.05	145.699
		396.808	301.322					16.3717	145.836
		56.2491	301.55					174.281	145.836
		183.93	303.105					354.69	146.019
		220.561	303.242					189.875	146.248
		379.659	303.242					4.61883	146.476
		405.726	303.242					58.2613	146.476
		135.135	303.883					305.254	146.476
		362.738	304.065					32.7434	146.659
		65.2582	304.934					296.154	146.659
		109.709	304.934					375.131	146.659
		41.4323	305.026					333.928	146.888
		199.159	305.346					151.004	146.979
		88.8554	305.666					329.08	147.391
		339.141	306.535					429.186	147.528
		125.897	306.947					314.767	147.711
		226.048	307.267					130.882	147.94
		169.113	307.77					367.723	148.031
		422.234	308.318					209.631	148.168
		262.999	308.41					23.5515	148.351
		319.843	308.41					49.7096	148.351
		31.6916	308.822					64.8466	148.351
		283.944	308.822					386.015	148.58
		0.777427	309.279					73.947	148.672
		277.084	309.919					193.991	148.763
		305.437	310.239					229.432	148.9
		353.638	310.422					420.542	149.22
		98.8247	310.651					39.3287	149.403
		295.285	310.742					217.177	149.403
		245.758	311.291					83.7792	149.54
		330.132	311.291					409.201	149.632
		159.601	311.474					139.068	149.723
		209.036	311.474					275.072	149.723
		141.263	311.931					180.866	149.861
		370.558	311.931					267.892	149.952
		411.625	311.931					95.5321	150.364
		395.528	312.023					202.543	150.364
		69.191	312.114					402.753	150.364
		83.2762	312.343					115.242	150.501
		56.8894	312.754					238.03	150.501
		182.33	312.754					286.596	150.501
		192.71	314.035					256.78	150.592
		19.5271	314.355					146.659	150.912
		234.829	314.858					323.044	150.912
		118.946	315.727					248.914	151.735
		314.767	315.727					347.464	151.735
		383.455	315.727					108.977	151.964
		44.7249	316.55					160.653	151.964
		345.589	316.779					332.785	152.467
		29.3593	317.19					379.567	152.696
		270.956	317.327					362.601	152.924
		111.081	317.419					20.396	153.107
		206.155	318.151					370.238	153.565
		360.909	318.242					35.533	153.885
		170.577	318.471					303.425	153.976
		98.5961	318.791					121.279	154.068
		253.99	319.02					58.9015	154.296
		291.489	319.111					171.125	154.296
		427.951	319.111					232.222	154.296
		224.494	319.34					309.69	154.296
		7.45415	320.163					224.585	154.479
		406.777	321.032					281.429	154.617
		149.861	321.123					91.4163	154.799
		128.87	321.763					65.4868	155.257
		59.3131	322.404					83.3676	155.348
		301.733	322.404					293.593	155.348
		83.8707	322.495					74.1757	155.44
		215.667	322.495					395.207	155.44
		239.402	323.684					43.9932	155.668
		285.682	323.958					316.87	155.668
		68.002	324.096					425.39	155.668
		22.271	324.187					100.837	155.897
		186.674	324.416					208.808	155.897
		351.306	324.416					387.616	155.988
		389.72	324.416					10.9754	156.08
		414.826	324.644					239.722	156.08
								352.357	156.08
								131.339	156.217
								27.8045	156.309
								416.838	156.629
								152.787	156.812
								177.162	156.812
								258.883	156.812
								140.943	156.949
								194.723	156.949
								161.476	157.04
								188.046	157.04
								275.621	157.452
								340.376	157.681
								378.516	157.772
								53.1852	158.412
								267.755	158.412
								326.108	158.641
								116.614	158.732
								17.6064	158.824
								408.881	158.961
								216.765	159.052
								147.3	159.464
								201.308	159.601
								41.4323	159.784
								0.868889	160.013
								296.566	160.013
								362.281	160.013
								71.3861	160.196
								334.477	160.333
								249.371	160.424
								348.562	160.653
								32.3318	160.836
								308.09	161.156
								403.165	161.156
								61.6454	161.476
								108.337	161.613
								390.36	161.796
								286.413	161.934
								97.2241	162.025
								158.412	162.116
								210.591	162.208
								135.958	162.437
								8.64316	162.528
								189.098	162.757
								24.8319	163.168
								126.218	163.305
								172.086	163.626
								80.075	163.717
								418.622	163.717
								89.587	164.037
								230.073	164.129
								273.792	164.357
								354.049	164.769
								116.202	164.997
								181.186	164.997
								370.467	165.089
								383.912	165.089
								48.2005	165.318
								247.222	165.318
								315.407	165.318
								322.907	165.409
								217.588	165.821
								197.467	165.912
								261.947	165.912
								105.593	166.369
								239.082	166.461
								165.501	166.552
								292.953	166.69
								36.7677	166.781
								252.298	167.01
								96.2638	167.101
								341.336	167.101
								281.84	167.193
								398.271	167.193
								28.4447	167.421
								152.787	167.513
								143.047	167.741
								9.8779	168.153
								330.635	168.153
								205.012	168.382
								131.339	168.565
								75.319	169.022
								83.3676	169.022
								18.0637	169.113
								66.31	169.205
								213.061	169.342
								363.562	169.342
								377.327	169.342
								424.567	169.342
								56.2491	169.525
								415.146	169.616
								189.967	169.845
								307.77	169.845
								124.754	169.936
								169.616	169.936
								408.332	170.074
								234.829	170.897
								229.25	171.034
								184.57	171.125
								389.171	171.354
								349.476	171.537
								160.653	171.766
								269.447	171.857
								298.806	171.857
								396.076	171.857
								257.603	172.406
								138.108	172.589
								340.605	172.589
								117.346	172.817
								221.201	172.909
								285.453	173.138
								2.37801	173.229
								24.7405	173.229
								322.266	173.229
								50.7614	173.366
								276.032	173.366
								111.218	173.458
								245.347	173.549
								71.066	173.869
								311.474	173.869
								146.979	173.961
								371.427	173.961
								177.985	174.189
								43.7646	174.281
								265.331	174.601
								381.259	174.601
								15.5943	174.921
								293.913	174.921
								410.161	175.15
								82.8189	175.241
								61.6454	175.47
								129.099	175.561
								329.812	175.653
								199.936	175.79
								358.165	176.11
								167.101	176.293
								99.1448	176.43
								252.115	176.75
								91.4163	176.842
								31.6001	177.07
								209.539	177.07
								306.078	177.482
								9.55778	177.894
								341.336	177.894
								258.792	178.214
								140.44	178.305
								393.515	178.305
								364.842	178.534
								124.526	178.625
								417.89	178.625
								156.72	178.763
								193.122	179.357
								176.43	179.494
								232.725	179.494
								66.9502	179.814
								186.354	179.814
								400.421	179.814
								424.43	179.814
								53.4138	180.134
								107.193	180.226
								39.5573	180.455
								283.029	180.455
								81.5841	180.546
								223.076	180.546
								241.414	180.546
								321.535	181.278
								377.327	181.506
								216.856	181.598
								115.745	181.826
								136.827	181.918
								330.772	182.009
								371.839	182.009
								409.201	182.009
								30.6398	182.147
								349.614	182.147
								207.207	182.558
								270.407	182.558
								301.413	182.878
								16.8747	182.97
								23.46	183.061
								95.6235	183.061
								292.221	183.381
								151.324	183.61
								251.886	183.61
								164.449	183.93
								74.1757	184.342
								127.91	184.479
								182.33	184.479
								46.0969	184.57
								387.616	184.57
								88.1237	184.662
								230.393	184.662
								200.21	185.073
								63.1545	185.531
								325.879	185.531
								417.89	185.622
								266.2	185.714
								312.846	185.942
								276.352	186.034
								195.043	186.171
								144.784	186.583
								361.046	186.583
								338.364	186.765
								120.638	186.903
								344.949	187.086
								111.538	187.406
								56.2491	187.726
								242.694	187.863
								134.906	188.183
								296.154	188.275
								7.04258	188.595
								188.915	188.686
								161.156	188.778
								258.883	188.915
								399.14	189.098
								389.171	189.326
								281.429	189.555
								367.174	189.646
								302.694	189.738
								376.503	189.738
								407.829	189.738
								215.485	189.875
								224.173	189.875
								423.149	189.875
								170.577	189.967
								71.9349	190.195
								103.489	190.287
								29.588	190.515
								233.274	190.698
								22.5911	190.927
								95.5321	190.927
								204.143	190.927
								154.068	191.018
								315.818	191.11
								351.717	191.11
								80.9439	191.43
								272.008	191.659
								250.194	191.75
								17.7436	192.207
								48.3377	192.207
								58.49	192.299
								86.7517	192.299
								39.7402	192.71
								109.617	193.031
								416.381	193.259
								126.858	193.351
								330.772	193.442
								141.675	193.762
								179.357	193.899
								262.999	194.22
								241.734	194.403
								312.251	194.814
								321.855	194.814
								211.369	195.043
								289.797	195.043
								368.638	195.271
								64.6179	195.363
								359.857	195.592
								6.72246	196.003
								170.257	196.095
								76.5994	196.232
								280.468	196.232
								203.32	196.506
								386.839	196.506
								194.631	196.643
								221.064	196.735
								378.698	196.735
								117.757	196.963
								131.751	197.055
								297.709	197.284
								101.477	197.604
								160.653	197.787
								255.088	198.198
								29.3593	198.335
								38.2769	198.518
								148.763	198.518
								52.1334	198.656
								93.6114	198.747
								227.74	198.747
								348.745	198.747
								429.323	198.747
								395.436	198.976
								411.122	198.976
								271.368	199.067
								84.0079	199.296
								402.021	199.936
								331.504	200.027
								178.945	200.119
								15.8229	200.348
								340.284	200.348
								419.902	200.348
								305.986	200.439
								154.479	201.079
								189.967	201.171
								68.8709	201.399
								213.564	201.399
								235.926	201.399
								320.574	201.399
								248.731	201.811
								283.441	201.811
								114.19	202.131
								171.034	202.131
								6.81392	202.223
								381.671	202.223
								374.034	202.36
								295.377	202.451
								61.7826	203.091
								128.55	203.091
								139.342	203.091
								197.787	203.183
								204.783	203.183
								23.46	203.32
								366.854	203.32
								355.101	203.732
								221.612	203.823
								314.675	204.052
								81.767	204.372
								146.156	204.463
								264.371	204.463
								107.056	204.555
								276.764	204.783
								45.2737	204.875
								425.161	205.012
								391.732	205.332
								402.936	205.424
								163.305	205.652
								91.1876	205.744
								246.261	205.744
								337.403	205.835
								121.279	206.247
								256.871	206.567
								417.753	206.567
								235.926	206.704
								187.863	207.116
								39.8774	207.207
								346.641	207.344
								133.535	207.527
								31.0514	207.847
								112.361	207.847
								305.117	207.847
								16.3717	207.939
								409.201	208.076
								230.942	208.168
								178.214	208.259
								214.296	208.396
								282.389	208.488
								73.0782	208.579
								384.644	208.579
								64.5265	208.716
								152.696	208.899
								53.8254	209.357
								362.007	209.539
								269.036	209.631
								296.337	209.631
								332.556	209.631
								2.37801	209.768
								96.5839	209.768
								170.485	209.86
								200.759	210.5
								321.123	210.591
								158.092	210.82
								255.179	210.82
								104.312	211.369
								354.37	211.369
								20.7161	211.78
								145.379	211.872
								372.662	211.872
								426.442	212.283
								128.87	212.512
								313.074	212.512
								45.3652	212.741
								191.43	212.832
								346.092	212.924
								35.9446	213.061
								207.024	213.244
								396.579	213.381
								83.3676	213.655
								240.454	213.655
								403.713	213.655
								277.084	213.975
								380.711	214.433
								28.4447	214.524
								326.748	214.524
								167.101	214.616
								118.306	214.844
								221.612	214.844
								414.826	214.936
								263.731	215.485
								339.416	215.485
								77.2397	215.576
								138.519	215.576
								303.562	215.576
								69.8313	215.896
								90.7761	215.896
								151.644	216.216
								6.631	216.308
								54.6943	216.445
								232.817	216.445
								14.3595	216.628
								212.924	216.628
								251.383	216.628
								184.479	217.085
								60.5021	217.177
								131.431	217.268
								289.98	217.268
								22.7283	217.588
								174.921	217.68
								112.773	217.908
								362.921	217.908
								41.8896	218
								371.839	218
								100.745	218.32
								318.562	218.548
								200.119	218.64
								144.647	218.777
								254.31	219.189
								282.389	219.509
								309.69	219.829
								389.72	219.92
								295.834	220.012
								420.862	220.149
								84.9682	220.332
								222.893	220.652
								271.139	220.881
								332.007	220.972
								241.505	221.201
								353.318	221.292
								402.433	221.292
								73.2153	221.933
								35.3958	222.161
								124.526	222.253
								66.5386	222.664
								162.757	222.664
								260.987	222.801
								411.716	222.801
								27.8045	222.893
								230.301	222.893
								347.601	222.893
								215.576	222.984
								339.644	223.213
								285.773	223.396
								46.8286	223.533
								206.796	223.853
								191.018	224.173
								153.976	224.356
								13.7193	224.494
								93.0169	224.494
								105.044	224.494
								377.647	224.585
								176.202	224.676
								183.519	224.676
								367.997	224.814
								294.233	225.088
								142.315	225.225
								387.159	225.317
								5.76211	225.408
								323.958	225.545
								396.899	225.545
								302.922	225.728
								58.8101	226.186
								169.022	226.369
								211.78	226.369
								115.882	226.597
								22.0881	226.78
								276.444	227.1
								406.96	227.1
								41.7524	227.329
								83.7792	227.329
								200.348	227.329
								427.082	227.329
								268.304	227.878
								250.103	227.969
								0.548772	228.198
								219.6	228.198
								132.711	228.289
								259.706	229.25
								332.556	229.25
								239.493	229.341
								357.845	229.432
								71.8434	229.57
								125.303	229.57
								315.407	229.57
								351.397	229.57
								173.046	229.753
								308.639	230.073
								186.994	231.033
								301.093	231.262
								34.1611	231.353
								55.6089	231.353
								403.576	231.353
								90.1358	231.582
								344.629	231.902
								380.711	231.993
								102.62	232.085
								419.445	232.085
								163.168	232.222
								387.616	232.222
								413.866	232.222
								181.506	232.634
								229.112	232.634
								326.748	232.634
								154.708	232.725
								9.8779	232.954
								109.846	232.954
								66.4472	233.045
								282.801	233.045
								19.2985	233.274
								49.8925	233.274
								263.959	233.365
								196.506	233.594
								395.665	234.326
								120.501	234.417
								140.852	234.417
								83.6877	234.509
								245.438	234.829
								29.6794	235.057
								205.744	235.286
								361.046	235.286
								275.163	235.698
								315.315	235.698
								3.65848	235.789
								220.469	235.789
								97.2241	236.018
								292.633	236.018
								131.202	236.246
								256.139	236.429
								151.644	236.521
								212.603	236.749
								75.8677	236.978
								334.888	237.39
								421.686	237.39
								374.674	237.618
								61.0052	237.801
								175.058	237.801
								236.109	237.938
								39.4201	238.121
								343.44	238.441
								162.345	238.533
								107.376	238.67
								19.8473	238.853
								115.654	238.853
								305.026	239.173
								298.898	239.31
								168.244	239.493
								353.821	239.493
								190.698	239.951
								284.264	240.225
								394.064	240.362
								123.474	240.865
								134.403	240.865
								327.983	241.002
								182.787	241.094
								66.7215	241.185
								89.7242	241.185
								270.819	241.185
								246.81	241.323
								366.443	241.414
								51.0815	241.505
								386.015	241.505
								409.293	241.505
								42.4841	241.826
								200.21	241.826
								400.421	242.237
								145.608	242.374
								227.42	242.374
								208.488	242.466
								263.868	242.466
								318.562	242.466
								81.4469	242.786
								415.741	242.786
								312.526	242.877
								153.885	243.198
								5.99076	243.518
								13.5821	243.518
								281.337	243.655
								343.577	243.746
								218	243.838
								98.1845	244.066
								73.3983	244.387
								27.2557	244.478
								237.39	245.118
								359.857	245.118
								167.01	245.21
								193.442	245.667
								294.142	245.667
								377.875	245.667
								176.202	245.941
								59.5418	246.17
								424.887	246.261
								183.93	246.399
								113.413	247.039
								335.849	247.222
								52.865	247.542
								131.522	247.542
								67.8191	247.862
								122.01	247.862
								160.653	247.862
								231.902	248.091
								252.298	248.182
								272.237	248.182
								384.872	248.274
								38.0482	248.411
								245.438	248.502
								262.816	248.594
								303.425	248.594
								325.147	248.731
								309.919	248.914
								106.965	249.143
								213.655	249.143
								352.129	249.143
								8.82608	249.234
								224.036	249.646
								27.4843	249.966
								145.928	249.966
								392.464	249.966
								202.451	250.103
								15.4114	250.194
								287.968	250.194
								91.0047	250.423
								82.7274	250.514
								400.284	250.606
								408.881	250.926
								340.605	251.246
								98.5961	251.383
								318.379	251.383
								416.701	251.566
								44.4048	251.658
								169.205	251.978
								1.09754	252.618
								358.577	252.938
								185.073	253.075
								365.254	253.075
								76.2793	253.396
								113.55	253.396
								139.342	253.396
								294.005	253.578
								371.839	253.578
								61.1424	253.899
								155.577	253.99
								123.382	254.447
								189.738	254.447
								426.762	254.539
								279.005	254.63
								302.831	254.767
								383.272	254.767
								209.128	255.179
								54.3742	255.27
								263.731	255.819
								412.585	255.819
								147.071	256.139
								238.762	256.139
								198.015	256.46
								272.831	256.551
								233.274	256.642
								247.679	256.871
								10.4267	256.963
								30.9599	256.963
								132.803	256.963
								326.931	256.963
								352.54	256.963
								254.447	257.191
								334.019	257.283
								92.3766	257.603
								177.665	257.603
								389.079	257.603
								25.335	257.831
								216.216	257.923
								399.872	257.923
								66.7215	258.243
								102.758	258.243
								162.757	258.243
								342.388	258.243
								285.956	258.472
								38.597	258.563
								16.3717	258.655
								1.73778	258.883
								311.931	258.883
								47.3773	259.386
								227.42	259.386
								153.885	259.523
								111.309	260.027
								303.105	260.027
								378.058	260.347
								317.099	260.667
								81.9957	261.216
								370.558	261.216
								251.658	261.398
								98.1845	261.536
								119.678	261.536
								137.33	262.039
								292.861	262.267
								65.2582	262.496
								355.742	262.496
								194.631	262.587
								202.543	262.587
								127.178	262.816
								261.719	263.319
								171.125	263.411
								184.57	263.411
								40.9293	263.639
								74.6787	263.731
								210.728	263.731
								422.875	263.731
								363.058	263.959
								8.32304	264.28
								328.943	264.371
								220.149	264.828
								275.072	265.011
								230.393	265.103
								243.426	265.103
								340.056	265.24
								54.8772	265.331
								87.0718	265.423
								2.37801	265.743
								29.8166	265.972
								396.076	266.2
								102.758	266.383
								310.331	266.383
								17.4235	266.52
								414.277	266.612
								162.665	266.703
								48.5206	266.932
								152.056	266.932
								348.104	266.932
								385.375	266.932
								301.23	267.023
								370.33	267.115
								286.185	267.252
								177.345	267.572
								113.55	267.755
								402.844	268.532
								143.367	268.944
								198.747	269.036
								120.181	269.264
								126.995	269.264
								97.0412	269.584
								207.207	269.584
								323.044	269.584
								377.875	269.584
								269.036	269.676
								226.186	269.767
								71.5233	269.904
								81.9042	269.904
								237.71	269.996
								189.418	270.316
								343.348	270.316
								250.743	270.407
								291.993	270.545
								24.1917	270.636
								260.667	270.819
								357.845	271.276
								55.1973	271.596
								423.058	271.596
								165.638	271.779
								215.073	271.779
								413.546	271.917
								30.9599	272.237
								183.519	272.328
								314.767	272.648
								139.159	272.74
								243.518	272.74
								326.84	272.831
								13.8108	273.06
								7.86573	273.289
								173.778	273.471
								387.799	273.471
								47.1487	273.609
								64.6179	273.609
								106.873	274.02
								276.261	274.112
								363.973	274.112
								100.517	274.34
								285.773	274.34
								38.2769	274.523
								336.489	274.523
								230.942	274.752
								395.756	274.752
								87.1633	274.843
								350.345	275.163
								405.085	275.301
								76.2793	275.621
								256.963	275.804
								117.895	275.941
								148.9	275.941
								300.91	276.032
								2.28655	276.261
								158.321	276.261
								377.647	276.352
								194.951	276.535
								309.782	276.993
								20.396	277.496
								177.574	277.496
								204.555	277.724
								370.65	277.724
								94.8004	277.816
								239.31	278.045
								209.448	278.456
								68.6422	278.548
								27.4843	278.685
								127.91	278.685
								345.132	278.868
								140.303	279.005
								222.344	279.005
								186.491	279.096
								166.461	279.188
								318.059	279.188
								13.9022	279.416
								281.749	279.416
								39.1	279.508
								271.779	279.737
								250.423	279.828
								388.851	280.057
								133.214	280.24
								428.271	280.377
								52.7736	280.56
								332.967	280.56
								400.421	280.56
								264.6	281.017
								418.942	281.017
								112.041	281.109
								365.254	281.337
								291.901	281.657
								88.2151	282.16
								60.7308	282.48
								232.634	282.48
								122.833	282.572
								313.486	282.709
								172.817	282.892
								71.7062	283.029
								101.157	283.121
								80.6238	283.349
								198.107	283.349
								156.217	283.532
								383.134	283.852
								21.1277	284.264
								6.631	284.721
								191.567	284.721
								299.309	284.904
								351.946	285.041
								411.213	285.041
								215.667	285.133
								45.5938	285.224
								341.016	285.224
								146.156	285.362
								328.76	285.362
								224.036	285.453
								251.978	285.682
								264.691	286.185
								403.393	286.276
								31.0514	286.505
								421.274	286.596
								39.9689	286.733
								56.7065	286.733
								138.428	286.733
								243.426	286.733
								374.171	286.733
								388.988	286.733
								162.528	287.054
								278.685	287.054
								65.1667	287.236
								288.105	287.374
								307.587	287.465
								114.465	287.557
								320.803	287.557
								96.904	287.785
								130.699	287.877
								179.906	287.877
								359.537	287.877
								15.2742	287.968
								207.024	288.746
								78.0628	289.066
								104.45	289.066
								366.443	289.157
								380.07	289.797
								2.46947	290.118
								123.382	290.118
								298.166	290.118
								86.7517	290.209
								213.564	290.3
								418.073	290.438
								344.309	290.529
								397.357	291.078
								151.735	291.169
								168.565	291.489
								248.411	291.581
								192.619	291.993
								223.533	291.993
								235.378	291.993
								260.164	292.221
								269.127	292.541
								61.0052	292.633
								70.8831	292.861
								26.6154	293.09
								176.75	293.182
								331.687	293.182
								351.809	293.273
								184.342	293.41
								314.675	293.41
								200.988	293.913
								47.4688	294.233
								14.7711	294.325
								119.266	294.325
								426.67	294.553
								93.7486	294.645
								34.7556	294.874
								139.48	294.965
								7.36269	295.194
								22.271	295.194
								144.967	295.194
								164.86	295.285
								390.589	295.377
								283.029	295.514
								406.549	295.605
								243.838	295.834
								343.76	295.834
								158.001	296.017
								325.971	296.017
								79.572	296.154
								294.325	296.245
								55.2888	296.337
								233.457	296.337
								276.261	296.657
								220.149	296.794
								383.912	296.886
								133.123	296.977
								103.261	297.114
								110.257	297.114
								0.594503	297.206
								266.795	297.206
								207.756	297.526
								369.689	297.526
								303.014	297.617
								87.8035	297.709
[truncated: 177 more rows]

## Sheet: DN3
Red		Green		Blue		Violet		Double
X	Y	X	Y	X	Y	X	Y	X	Y
350.117	0.548772	61.9655	0.45731	80.8067	0.503041	45.8682	0.685965	12.2102	0.503041
58.2613	2.0579	73.3983	0.548772	412.357	1.23474	87.0718	0.91462	124.846	0.685965
210.911	2.28655	179.906	0.503041	239.402	1.73778	388.759	2.14936	131.751	0.685965
325.056	2.69813	302.282	0.731696	259.295	2.92678	369.278	3.33836	194.631	0.685965
95.3034	2.78959	356.565	1.41766	207.756	3.42983	244.158	4.39018	263.228	0.503041
401.884	2.78959	104.13	1.73778	123.291	3.8414	346.641	5.35053	273.471	0.503041
77.8799	3.33836	92.148	2.37801	426.762	3.9786	127.407	5.99076	308.318	0.777427
178.442	3.65848	9.2834	2.46947	142.955	4.07006	66.31	6.81392	335.711	0.777427
299.218	3.65848	317.007	2.60667	294.005	4.93895	408.149	8.32304	417.981	1.00608
13.3992	4.29871	154.937	2.92678	400.512	6.08222	102.941	8.73462	424.43	0.503041
137.788	4.29871	35.2129	3.74994	307.678	6.31088	183.381	8.96328	20.8991	1.23474
365.162	4.29871	249.646	3.74994	218.777	6.40234	326.931	9.2834	347.053	1.23474
337.129	4.80176	341.336	3.9786	157.269	6.72246	277.176	9.78644	384.735	1.3262
2.37801	4.93895	414.369	3.9786	10.4267	6.81392	218.869	10.5181	41.9811	1.41766
316.367	5.03041	203.64	4.71029	334.797	7.04258	203.823	11.0669	215.988	1.41766
263.868	5.12187	169.433	4.80176	97.6357	7.27123	299.858	11.4785	376.595	1.41766
419.765	5.12187	190.79	5.57918	55.8376	7.77427	15.7315	12.9876	226.369	1.64632
164.997	5.35053	273.7	5.76211	39.4201	9.1462	164.677	13.4906	158.092	2.37801
38.7799	5.44199	326.428	6.72246	373.531	10.0151	257.374	16.7833	183.061	2.37801
228.929	5.99076	113.413	6.81392	174.601	11.2956	81.4469	18.5668	396.076	2.46947
193.899	7.13404	215.256	7.27123	319.02	11.4785	366.946	20.1674	407.28	2.60667
88.1237	7.77427	376.275	7.36269	269.676	11.7986	34.344	21.2192	107.056	3.56702
383.363	8.41451	430.878	7.68281	360.086	12.3474	312.663	21.3107	118.398	3.56702
281.84	9.2834	397.86	8.73462	421.686	13.3077	385.695	22.9112	51.173	3.74994
114.465	9.37486	265.88	8.96328	246.079	13.9022	234.646	23.1399	70.5629	3.74994
28.6276	10.8382	365.482	9.05474	199.479	14.1309	103.581	23.2314	232.954	3.74994
252.527	11.7986	147.711	9.1462	81.767	15.5943	144.236	23.2314	99.0534	3.8414
67.9106	11.8901	15.8229	10.198	131.431	15.7315	50.0297	23.8716	173.046	3.8414
397.357	12.0273	71.7062	10.198	387.616	15.8229	191.979	24.5118	276.673	3.9786
48.4291	14.7711	51.4931	10.5181	295.377	16.6918	123.474	24.9234	319.66	3.9786
127.727	14.7711	85.0597	10.9754	112.041	17.8351	402.021	26.6154	329.675	4.16152
228.518	15.4114	338.501	12.4388	346.412	18.2467	297.709	27.8959	252.938	4.39018
147.3	15.5028	228.289	12.6675	63.1545	19.207	348.333	28.1246	149.083	4.71029
413.317	17.1949	418.393	12.6675	225.957	20.1674	424.43	28.9477	81.6756	5.25907
311.291	17.4235	285.362	12.8504	280.057	20.396	283.212	29.0392	27.8045	5.44199
215.896	17.8351	139.663	13.0791	23.6429	20.7161	7.13404	29.6794	352.037	5.67065
38.1397	18.3839	37.5452	13.5821	303.974	20.7161	213.792	30.4569	268.075	5.76211
102.849	18.7954	239.63	13.5821	187.954	20.8991	86.203	34.2525	223.625	5.85357
343.989	18.8869	352.357	13.5821	210.911	21.1277	264.6	34.7556	59.9534	6.08222
379.659	19.6186	311.794	13.8108	376.686	21.1277	157.772	36.9049	287.374	6.17369
166.369	19.9387	96.7211	14.0394	416.518	21.4478	327.891	36.9964	92.0565	6.31088
359.537	20.4875	105.822	14.0394	405.177	21.8594	23.0027	37.9567	370.147	6.31088
236.521	20.579	256.551	14.2223	334.888	22.5911	363.79	39.7402	359.857	6.40234
70.0142	20.7161	384.964	14.8626	45.5938	23.46	247.679	40.0604	240.134	7.04258
323.364	20.7161	123.291	15.9144	262.176	24.1002	173.778	40.7921	198.838	7.27123
288.746	20.8076	299.63	15.9144	93.1998	24.2832	67.3618	42.3926	416.061	7.45415
264.188	21.3107	7.27123	16.143	324.919	24.4204	38.1397	42.9414	44.4963	7.68281
139.571	21.6308	193.351	16.2345	156.08	25.4722	198.335	43.5817	208.259	7.68281
181.278	21.6308	404.857	17.0119	6.31088	25.9752	410.985	44.3133	339.736	7.77427
199.799	21.8594	330.224	17.1034	237.938	27.5758	115.242	44.7249	168.061	8.09439
13.5821	22.7283	181.278	17.1949	359.995	28.3075	309.37	45.4566	300.361	8.09439
82.4987	23.2314	220.149	17.2863	173.366	30.1367	389.491	45.7767	33.3836	8.41451
429.963	24.4204	203.64	18.3839	19.9387	30.8684	223.625	46.9657	18.4753	8.50597
110.989	24.5118	57.0266	18.4753	136.278	30.8684	277.816	47.0572	141.355	8.73462
300.361	25.6551	159.464	19.6186	392.464	31.0514	135.318	50.1212	312.114	8.73462
399.369	25.8838	27.8959	19.7558	200.53	32.8806	426.853	52.5449	177.894	9.2834
28.6276	26.4325	271.368	20.7161	50.3498	33.0635	350.254	52.7736	5.25907	9.37486
333.196	27.027	373.119	20.7161	186.171	33.9324	326.84	53.0022	259.844	9.37486
55.6089	27.1642	320.574	21.5393	32.9721	34.5726	254.767	53.1852	389.811	9.55778
96.4924	28.3075	247.039	21.768	109.617	34.5726	180.455	54.3742	247.039	9.78644
274.523	28.7191	395.116	22.7283	223.076	35.3958	13.0791	55.1973	425.619	9.8779
316.459	28.7191	175.561	22.8198	71.066	35.533	99.4649	55.8376	78.4744	10.198
248.822	29.2678	126.858	24.1002	306.398	36.2647	292.541	56.2491	132.574	10.198
229.432	29.6794	72.758	24.1917	408.652	36.3562	44.4048	58.49	232.725	10.198
381.762	30.2282	230.804	24.6033	249.646	36.6763	366.214	58.9015	124.846	10.8382
151.964	30.9599	358.577	24.7405	82.6359	36.7677	231.902	59.1302	159.784	10.8382
369.415	30.9599	289.249	25.335	342.068	36.9049	403.713	59.8619	108.886	10.9754
104.861	31.3715	18.3839	25.6551	290.3	37.5452	81.767	60.2735	402.524	10.9754
411.716	33.2007	162.528	26.1124	378.698	37.7281	114.693	61.8741	151.095	11.0669
40.4719	33.5208	139.48	26.2039	129.51	38.1397	63.4746	63.6576	189.098	11.1584
74.4501	33.6123	388.119	26.6154	276.261	39.6488	28.4447	64.2978	214.753	11.387
3.01825	35.3043	256.642	26.7069	97.5442	39.7402	208.488	64.2978	380.208	11.8901
218.96	35.3043	219.692	27.2557	317.19	40.0604	308.639	64.435	293.685	12.3474
167.833	35.3958	103.809	27.3471	147.391	41.661	385.787	65.6697	9.37486	12.759
240.134	36.1732	0.548772	27.4843	10.7468	42.164	136.507	67.0417	116.202	12.8504
258.883	36.1732	84.5109	27.9874	425.481	42.3926	348.013	67.3618	3.2469	13.0791
430.375	36.2647	429.826	27.9874	353.181	43.0329	419.582	68.9624	321.672	13.0791
190.698	36.5848	279.828	28.1246	165.18	43.4445	272.1	69.3739	60.0905	13.3077
117.757	36.6763	414.506	28.1246	235.469	45.045	324.279	70.2428	99.8765	13.3077
203.823	37.7281	307.907	28.216	263.411	45.045	246.17	72.4379	344.72	13.3077
282.389	38.3683	114.465	28.4447	328.76	45.2737	224.676	73.0782	410.024	13.3077
396.579	38.9171	184.342	28.5362	21.6308	46.1883	290.849	74.3586	24.7405	13.7193
357.205	39.7402	208.076	28.5362	60.8222	46.3255	186.354	76.0507	52.0419	13.9022
13.3077	39.8774	345.589	28.9477	209.631	46.3255	107.193	77.5598	184.57	14.0394
346.229	40.1518	321.535	29.1764	190.378	47.7889	144.144	77.6513	32.0117	14.1309
61.9655	40.4719	68.2307	29.6794	399.369	47.7889	49.1608	79.6634	273.06	14.1309
142.544	40.7921	267.755	30.2282	290.118	48.4291	78.1543	80.075	331.413	14.1309
294.553	41.0207	43.9932	30.8684	43.1243	49.3895	8.96328	80.3037	365.391	14.5425
307.907	41.9811	55.2888	31.28	123.154	50.2126	362.921	80.6238	70.2428	14.8626
129.83	42.164	148.168	31.3715	367.997	51.0815	41.7524	82.1786	207.116	15.0912
381.122	42.7128	372.571	31.6001	275.484	51.3102	378.378	83.8707	315.407	15.1827
33.6123	43.0329	32.4233	31.6916	170.257	51.7218	204.372	84.328	86.1115	15.2742
267.435	44.9536	332.144	31.6916	307.129	51.9047	431.198	84.5109	290.3	15.2742
78.383	45.2737	197.924	33.3836	86.5231	52.5449	401.793	85.8828	222.573	15.5943
253.578	45.2737	232.314	34.0239	243.929	52.6821	269.127	86.4316	280.88	15.5943
50.67	45.5938	301.23	34.8928	108.748	52.7736	229.981	86.8432	305.986	15.8229
336.352	45.5938	123.154	35.3958	260.895	53.1852	311.474	86.8432	136.919	16.0516
94.1601	45.6853	398.591	35.3958	223.305	54.0541	336.992	86.9804	251.978	16.143
154.388	46.6456	13.1705	35.6245	341.245	54.5571	123.062	89.4956	371.93	16.143
370.878	46.9657	383.775	35.9446	387.799	55.0144	162.848	90.1358	356.885	16.2345
321.855	47.1487	357.845	36.2647	29.4965	55.929	421.045	92.6968	170.165	16.3717
105.822	47.4688	94.8004	36.7677	416.289	57.2095	64.5265	93.0169	240.134	16.5546
410.161	48.3377	245.758	36.9049	71.8434	57.7583	184.982	94.0687	41.9811	16.6918
205.652	49.0694	286.505	37.7281	201.308	58.1698	103.581	94.4803	427.631	17.1949
5.67065	49.3895	421.045	37.8653	144.556	58.49	326.611	95.7607	264.828	17.2863
298.029	49.3895	135.867	38.2769	321.763	58.8101	368.866	96.401	175.79	17.6064
173.549	49.8011	49.481	39.0086	11.7071	60.2735	27.3471	96.5839	107.056	17.8351
234.234	50.3498	209.219	39.2372	283.121	61.6454	151.095	96.8125	418.622	17.8351
144.327	50.4413	169.754	39.4201	375.223	62.1942	246.399	97.0412	336.169	18.0637
421.777	51.4931	81.0354	40.1518	340.513	62.5143	6.17369	98.7333	49.5724	18.2467
288.105	52.865	408.652	41.0207	185.531	63.1545	48.2005	98.7333	92.4681	18.704
24.1917	53.3224	179.997	41.5695	395.436	64.1149	215.485	99.8765	383.043	18.704
113.001	53.9169	228.198	41.7524	254.127	64.8466	294.965	100.288	391.96	18.704
392.784	54.3742	2.92678	41.8896	358.897	64.8466	84.4194	100.425	142.452	18.7954
189.098	54.8772	337.632	41.8896	220.652	65.2582	389.079	100.608	17.2863	18.8869
354.873	56.0662	314.035	41.9811	59.5418	65.9898	266.383	103.032	194.082	19.0241
80.9439	56.1577	158.961	42.3926	155.12	65.9898	282.572	105.044	75.5476	19.5271
275.712	56.8894	370.238	42.8042	298.486	66.4472	173.229	105.822	124.114	19.7558
312.114	57.301	259.295	43.2615	270.956	67.0417	348.653	105.822	231.262	19.8473
56.2491	57.4381	347.373	43.2615	112.91	68.1392	131.934	106.142	152.376	20.0759
213.152	57.4381	64.8466	43.353	424.978	68.1392	405.588	109.937	352.998	20.1674
223.625	57.4381	274.249	43.353	41.3408	68.3221	200.53	111.081	398.729	20.4875
161.293	57.8497	106.233	43.9932	131.111	68.5508	228.929	111.218	273.471	20.579
129.602	58.5814	301.23	44.8164	98.8247	68.7337	308.73	112.361	8.00293	20.7161
341.336	58.9015	148.992	45.3652	173.458	71.3861	69.0538	112.773	298.669	20.7161
252.755	59.0387	17.7436	46.1883	237.39	71.5233	246.582	115.013	412.036	20.9905
263.319	59.4503	122.33	46.1883	408.561	71.7062	27.8959	115.105	216.765	21.1277
303.654	61.0052	292.953	46.7371	386.839	72.3465	9.2834	116.202	87.4834	21.2192
38.4598	61.6454	33.3836	46.8286	336.9	73.3068	330.315	116.934	205.012	21.2192
326.611	61.6454	134.266	46.9657	161.613	73.5355	368.638	117.437	0.91462	21.4478
93.9315	62.2856	386.839	47.3773	87.8035	73.6269	53.4138	117.666	256.139	21.4478
369.415	62.2856	241.185	47.8804	11.4785	74.2672	110.029	118.626	159.921	21.6308
242.694	62.7429	362.19	48.3377	139.251	74.3586	158.504	118.626	329.583	21.9509
387.479	62.9259	217.177	48.4291	321.763	74.7702	372.25	118.946	307.77	22.4082
200.851	63.246	327.068	48.5206	211.232	76.4622	349.293	119.907	29.9995	22.4997
429.094	63.6576	420.085	48.7493	69.6941	76.5994	92.2394	120.821	57.4381	22.4997
176.202	64.7551	254.219	49.0694	309.05	76.9196	422.326	121.782	96.4924	22.7283
413.637	65.2582	395.848	49.1608	350.757	78.4744	402.296	122.33	223.213	22.9112
18.704	66.8587	85.6085	49.3895	281.429	79.0232	134.083	122.422	267.572	22.9112
67.5904	66.9502	161.705	50.1212	259.935	79.1146	190.058	122.833	345.681	22.9112
108.154	68.6422	200.53	50.5328	121.37	80.8067	386.015	123.474	242.374	23.0027
166.141	69.8313	97.4528	50.9901	368.455	81.1268	270.819	123.885	250.103	23.0027
231.033	69.8313	180.775	51.173	196.643	81.264	290.758	128.367	64.2063	23.3228
359.217	69.8313	38.597	51.7218	28.6276	82.0872	315.727	128.779	424.658	23.3228
5.76211	70.2428	377.738	51.9047	105.273	82.4987	222.344	129.739	282.389	23.6429
278.365	70.3343	2.78959	52.5449	154.205	83.2762	164.86	130.059	293.502	23.6429
344.72	70.4715	409.933	52.7736	413.637	83.8707	205.744	131.111	117.574	23.8716
139.983	70.6544	73.6269	52.865	227.1	84.0079	39.7402	131.614	78.1543	23.963
314.035	71.3861	346.641	53.5053	182.878	84.0993	69.5111	133.214	178.945	24.1002
289.569	71.6148	285.544	53.9169	298.989	84.1908	351.168	133.352	364.522	24.1002
123.291	72.255	53.7339	54.6943	88.4438	84.7396	147.208	133.626	185.714	24.1917
152.604	73.3068	265.88	55.0144	243.655	85.1511	3.33836	135.135	319.431	24.1917
399.232	73.3983	21.1277	55.1973	396.899	85.7914	258.152	135.455	381.671	24.8319
205.012	73.6269	148.351	55.5174	59.7704	86.02	410.344	135.455	22.9112	25.335
375.223	73.6269	210.911	56.1577	46.417	87.0718	21.2192	136.416	38.0482	25.335
81.3555	73.947	334.568	56.3863	75.6391	88.3523	106.325	136.416	339.736	25.5636
193.899	73.947	194.631	57.2095	168.793	88.3523	328.532	136.507	132.071	25.9752
34.0239	74.0385	236.246	57.301	326.931	88.7639	86.7517	137.467	150.272	25.9752
304.523	74.7702	112.041	57.5296	213.975	89.084	126.218	138.519	369.689	26.2039
48.2005	75.2275	301.093	57.8497	2.0579	89.4041	428.454	140.211	211.963	26.7069
264.92	75.7306	317.831	58.49	20.579	89.7242	238.213	140.623	392.052	27.1642
23.5515	76.5994	351.489	58.7186	142.452	91.0962	180.455	141.812	170.165	27.2557
253.487	77.5598	137.147	59.2217	259.386	92.2394	360.406	144.647	231.993	27.6673
218.32	77.8799	386.427	59.5418	97.3156	94.4803	294.462	144.967	70.9745	27.8959
414.597	78.0628	272.831	60.182	291.993	94.8004	378.058	145.516	199.159	28.1246
61.0052	78.6116	164.86	60.5936	307.129	94.8004	275.072	145.928	48.4291	28.216
331.413	79.4348	363.241	60.5936	113.87	94.8918	310.011	145.928	107.285	28.9477
91.9193	79.6634	120.638	61.1424	359.766	95.029	26.2953	146.888	311.794	28.9477
421.914	80.4866	428.134	61.2338	379.339	95.1205	49.8011	147.391	12.6675	29.2678
238.762	81.264	57.2095	61.6454	431.381	95.1205	213.061	148.031	164.357	29.2678
345.361	81.264	91.1876	62.6058	344.537	96.0809	196.735	148.58	221.612	29.2678
288.517	82.7274	175.058	62.7429	276.261	97.2241	161.613	149.54	354.781	29.2678
117.437	83.6877	224.494	62.9259	74.9989	97.7729	41.661	149.632	156.949	29.8166
177.802	83.8707	290.941	63.0173	234.737	97.7729	8.64316	150.181	260.895	29.8166
193.122	84.1908	153.016	63.3374	128.458	98.093	251.475	150.775	35.0757	29.9995
385.467	85.1511	21.3107	64.1149	38.1397	98.8247	73.2153	152.056	78.9317	30.1367
131.934	85.2883	36.1732	64.2063	58.9015	99.968	395.116	153.107	1.87497	30.2282
355.33	85.4713	241.002	65.0295	194.951	100.745	144.236	153.885	118.398	30.2282
315.635	85.8828	338.364	65.8069	179.083	100.928	111.081	154.479	430.375	30.2282
107.925	86.203	249.554	66.2185	317.968	101.889	415.969	156.217	141.172	30.3197
274.523	86.5231	417.661	66.2185	415.329	101.98	281.977	157.269	123.611	30.4569
300.681	87.0718	403.073	66.31	13.5821	102.529	345.04	157.36	253.807	30.4569
163.488	87.1633	318.562	66.8587	399.78	102.849	323.776	158.732	406.96	30.4569
257.283	88.4438	72.5751	67.0417	333.516	103.489	93.1998	159.784	58.1698	30.5483
9.8779	88.7639	105.501	67.1789	25.5636	103.672	228.609	160.424	386.656	30.5483
368.958	89.084	145.379	67.6819	162.437	103.809	301.55	160.973	303.105	30.7312
430.878	89.3127	49.3895	67.8191	367.997	104.633	381.671	164.86	376.686	31.0514
72.758	89.4956	216.216	68.5508	223.716	105.273	57.301	164.997	416.701	31.28
34.5726	89.8157	192.07	68.6422	242.237	106.233	180.226	165.501	89.3127	31.6916
205.927	89.8157	329.583	69.2825	210.728	106.462	35.8531	166.369	189.738	31.8288
238.67	90.1358	264.691	69.3739	110.898	107.193	363.79	166.369	335.3	31.8288
46.7371	92.148	378.698	69.6941	306.718	107.285	10.6553	167.65	399.552	31.8288
409.293	93.1083	128.138	69.8313	92.4681	107.376	261.947	167.741	98.5961	32.1489
220.332	93.1998	170.165	70.6544	151.324	107.925	101.797	168.702	325.468	32.1489
148.168	93.5199	80.7152	70.8831	257.191	107.925	190.607	168.885	205.652	32.2404
336.489	94.2516	284.264	70.9745	139.068	109.206	158.092	169.616	277.724	32.2404
126.446	94.5717	10.198	71.2032	351.717	110.578	125.394	169.845	243.198	32.5605
286.276	94.5717	31.8288	71.2032	380.208	110.761	422.966	170.485	269.356	32.6519
348.425	95.029	367.815	71.6148	46.0969	110.898	242.557	171.857	129.922	32.8806
178.945	95.1205	305.117	71.9349	273.792	111.309	279.325	172.817	287.877	32.8806
90.6846	95.7607	346.55	71.9349	123.702	111.629	211.232	173.138	24.4204	33.9324
268.715	97.0412	229.57	72.0263	189.326	112.681	81.4469	174.281	360.498	34.344
61.5539	97.2241	429.003	73.0782	429.506	113.642	404.445	175.561	146.751	34.4355
16.8747	98.7333	184.799	73.2153	288.105	113.962	330.772	178.305	179.357	34.4355
323.684	98.8247	60.0905	74.0385	78.1543	114.282	351.306	178.442	294.325	34.6641
251.658	100.105	97.7729	74.3586	170.074	114.693	295.925	181.689	45.3652	34.8928
139.068	100.288	396.717	74.3586	393.515	115.974	52.362	182.97	346.641	34.8928
300.59	100.288	359.126	74.6787	413.957	117.346	168.244	183.519	317.51	34.9842
205.652	100.608	157.589	74.9989	221.521	119.358	185.211	184.159	371.61	35.3043
394.293	100.608	201.308	74.9989	318.471	119.449	314.446	184.57	210.82	35.533
165.409	100.745	411.625	76.2793	59.3131	120.09	259.706	184.982	171.766	35.6245
425.801	101.157	44.6335	76.7824	103.169	120.959	380.528	185.622	227.329	35.6245
1.96643	101.477	330.635	76.7824	238.121	121.05	28.8563	187.223	392.143	35.7159
119.907	101.66	257.511	77.2397	257.831	121.279	147.3	187.314	16.2345	36.1732
103.169	102.437	116.202	77.3311	34.0239	121.599	68.8709	188.778	424.247	36.1732
232.725	102.849	2.69813	77.4226	19.6186	121.919	14.2223	191.75	310.834	36.2647
191.887	103.261	315.635	77.5598	339.324	121.919	87.3005	191.887	235.378	36.5848
377.235	103.672	379.019	77.8799	298.029	122.513	43.353	193.122	197.146	36.7677
363.379	104.13	271.368	78.383	373.531	123.062	109.846	193.579	56.2491	36.9964
45.1365	106.736	295.697	78.383	150.272	123.474	204.143	193.579	137.97	37.5452
412.814	107.056	20.8991	78.6116	181.186	124.205	279.325	194.723	37.408	37.7281
77.3311	107.285	131.339	78.6116	282.069	124.663	413.546	194.723	352.357	38.0482
279.965	107.514	238.533	79.4348	355.193	124.846	365.894	195.363	6.31088	38.1397
158.504	110.578	170.074	79.6634	85.6085	126.126	238.121	195.912	102.3	38.4598
261.947	110.578	220.789	80.9439	207.665	127.086	392.875	197.146	64.2063	38.597
60.0905	110.669	340.513	81.264	117.117	127.498	336.26	198.335	413.546	38.597
220.561	110.761	244.478	81.767	48.9779	127.91	304.203	199.159	163.397	38.6884
388.988	111.218	138.931	82.1786	198.015	127.91	136.416	202.451	270.728	38.7799
243.015	111.401	210.408	82.1786	73.8556	128.138	162.757	203.732	111.081	38.9171
35.3958	111.538	70.7459	82.4073	412.494	128.779	65.8069	204.372	30.5483	39.0086
325.376	111.721	389.72	82.4073	133.763	129.327	251.246	204.372	402.936	39.1
181.186	112.361	148.9	82.7274	158.824	129.602	215.073	204.463	90.6846	39.2372
399.14	112.59	404.765	82.7274	329.583	129.922	426.579	205.424	261.078	39.5573
107.925	112.681	83.2762	82.8189	11.4785	130.699	180.226	206.476	300.178	39.6488
341.245	113.093	102.209	82.8189	428.042	130.882	12.1187	206.704	331.413	39.9689
15.7315	113.87	189.235	84.9682	261.719	131.339	325.559	207.436	253.487	40.0604
295.697	114.282	371.61	85.1511	176.43	131.522	349.476	207.665	120.959	40.1518
0.868889	115.334	307.358	85.3798	397.22	131.934	269.264	208.168	186.583	40.1518
142.955	115.334	10.0151	85.6085	245.758	132.574	115.242	209.128	151.232	40.3805
361.687	115.654	326.84	85.7914	296.337	133.214	100.928	212.283	430.146	40.4719
211.049	116.614	422.006	85.7914	57.2095	134.083	406.229	212.512	384.644	40.6091
89.587	117.117	28.9477	86.02	97.8644	135.044	83.7792	214.433	72.6666	40.7006
311.382	118.626	360.086	86.02	228.792	136.187	231.765	214.844	219.372	40.7921
424.43	118.626	115.562	86.3401	313.943	136.187	284.401	215.805	16.4632	40.9293
131.339	118.809	126.126	86.3401	274.02	136.599	152.056	215.896	214.616	40.9293
280.377	120.41	56.1577	87.3005	345.04	136.599	133.214	216.125	193.031	41.5695
227.329	121.05	278.136	87.3005	363.79	137.239	375.406	216.445	323.547	41.5695
376.915	122.193	293.502	87.6206	31.9202	137.97	192.802	216.948	133.626	41.661
167.833	122.422	36.7677	87.7121	376.183	140.44	37.0878	217.177	240.454	41.7524
46.1883	122.513	351.946	88.8554	207.024	141.675	303.334	220.789	231.262	41.8896
346.55	122.513	197.604	90.1358	393.424	142.132	60.4107	221.612	286.505	42.3926
197.604	123.154	414.369	90.1358	190.698	143.275	338.181	223.213	44.1762	42.6213
118.398	123.794	68.8709	90.4559	419.445	144.007	212.192	223.533	280.057	42.6213
265.972	123.885	249.646	92.0565	44.7249	144.967	3.56702	224.814	394.887	42.7128
72.255	124.022	139.48	92.3766	115.334	144.967	20.8076	225.088	341.108	42.8042
253.807	124.343	179.586	92.3766	81.5841	145.059	251.155	225.408	357.342	43.0329
27.9874	125.394	162.345	92.4681	146.339	145.287	355.101	225.728	82.4987	43.353
237.298	125.394	0.731696	92.5596	101.797	145.516	240.134	225.957	417.89	43.856
361.366	125.806	108.154	92.6968	15.9144	145.608	102.117	226.597	374.994	44.0847
62.8344	125.897	89.1755	92.7882	158.092	145.608	145.516	226.689	109.068	44.3133
102.437	125.897	226.689	93.337	286.916	145.836	122.513	228.929	98.1845	44.4963
14.2223	126.858	373.211	93.5199	134.815	146.979	185.531	229.661	140.44	44.4963
406.457	126.858	266.383	93.7486	252.298	147.391	413.957	229.753	203.823	44.7249
4.07006	127.407	210.271	93.9315	321.763	147.391	388.348	229.981	2.28655	44.9536
151.644	127.91	50.67	94.4803	236.429	147.528	429.186	231.902	177.665	45.2737
326.748	128.138	386.015	95.212	404.765	147.848	322.587	232.496	296.566	45.2737
178.763	128.23	18.3839	95.3034	173.138	148.58	72.9867	232.634	159.373	45.3652
303.105	128.458	242.054	95.5321	356.473	148.9	267.984	233.045	169.433	45.3652
338.821	130.242	32.4233	96.401	340.056	149.083	164.037	233.457	270.728	45.3652
279.965	130.791	304.843	96.904	220.972	149.22	38.2769	235.057	365.482	45.3652
421.045	131.934	397.86	97.1327	63.4746	151.873	293.273	236.338	54.3742	45.4566
88.7639	132.894	122.33	97.9558	300.91	152.284	216.856	236.658	405.177	45.5938
189.098	133.032	285.133	98.093	261.536	153.016	250.194	238.03	65.3496	45.7767
371.519	133.352	80.3951	98.5046	31.9202	153.656	366.626	239.31	128.55	45.7767
388.119	133.626	366.946	98.9162	366.214	154.799	142.955	240.362	315.407	45.8682
124.754	134.724	318.791	99.0534	87.392	155.668	21.3107	243.335	26.6154	46.1883
269.767	135.227	169.936	99.1448	383.272	156.309	54.8772	243.518	306.306	46.6456
236.521	136.507	332.647	99.2363	5.67065	156.4	120.638	244.249	36.036	46.8286
250.514	136.599	407.418	99.4649	278.365	156.629	386.427	244.478	257.831	46.8286
55.426	137.467	343.12	100.105	427.493	158.412	347.693	245.118	346.641	47.0572
141.263	137.467	202.36	100.425	184.799	159.144	2.69813	245.85	11.1584	47.7889
317.007	139.068	153.976	101.477	200.668	159.144	231.033	246.49	90.0444	48.0176
37.0878	139.342	130.882	101.889	162.985	160.333	305.895	246.719	245.667	48.109
159.373	139.571	68.8709	102.117	216.445	160.653	251.978	247.222	424.658	48.3377
218.548	139.983	97.5442	102.117	49.1608	161.293	103.901	247.45	284.721	48.7493
12.9876	140.76	354.049	102.209	19.5271	162.345	74.3586	249.966	380.848	48.9779
404.216	140.76	186.994	102.3	251.063	162.345	281.429	250.606	183.701	49.3895
201.171	141.263	259.203	102.437	119.998	162.665	202.68	250.835	265.743	49.3895
286.505	141.583	146.019	102.758	220.561	163.168	173.458	251.155	149.723	49.481
73.947	142.132	219.692	103.261	412.265	163.397	329.812	251.383	390.268	49.481
360.177	142.132	45.2737	103.352	238.35	163.488	406.457	251.886	116.294	49.5724
106.462	142.223	274.843	103.352	333.928	164.22	157.909	252.527	72.1635	49.7096
330.132	142.223	108.748	103.489	135.044	164.357	422.417	254.767	18.3839	50.2126
170.165	142.315	233.594	104.13	144.784	164.449	129.922	256.002	211.369	50.3498
64.1149	142.772	424.43	105.044	286.825	164.769	372.891	256.139	331.275	50.5328
414.689	143.184	309.69	105.364	104.312	164.997	34.7556	256.231	356.702	50.5328
227.329	144.236	381.991	105.364	314.355	165.089	315.818	258.334	337.952	50.67
121.37	146.568	293.09	105.501	398.271	165.729	186.354	261.078	219.6	50.8529
91.7364	147.391	14.0394	105.913	77.8799	166.69	10.0151	261.536	414.689	50.8529
346.321	147.391	370.97	106.142	346.229	166.872	264.371	262.176	31.0514	51.0815
182.33	147.528	327.251	107.376	370.01	168.565	54.0541	262.679	102.117	51.0815
4.29871	147.94	34.0239	107.697	65.5783	168.793	352.449	262.679	372.799	51.0815
193.671	147.94	391.503	108.017	269.584	170.074	72.8952	265.011	81.6756	51.4931
37.3165	148.031	195.271	108.154	168.885	172.177	143.687	265.011	302.282	51.5846
261.216	148.351	411.122	109.297	24.4204	173.961	218	265.743	55.8376	51.8132
303.105	148.489	51.5846	109.526	321.215	174.098	234.509	265.88	228.701	52.1334
375.726	150.501	82.9561	109.617	355.97	174.51	92.6968	266.612	194.494	52.362
278.365	150.592	169.205	109.846	204.052	174.738	292.77	267.115	164.357	52.4535
23.46	150.912	254.31	110.761	300.361	174.738	386.015	267.252	238.213	52.5449
103.489	151.644	316.276	110.761	381.991	175.15	406.137	267.892	293.822	52.5449
424.658	152.056	280.697	111.218	3.74994	175.333	110.486	268.532	47.3773	52.6821
388.028	152.696	97.6357	111.401	183.519	175.333	427.814	268.944	250.835	52.6821
328.76	152.924	179.677	111.401	92.3766	175.47	29.9995	269.584	398.18	52.7736
153.976	153.656	359.674	112.178	221.201	175.973	250.926	269.904	280.24	52.865
54.237	153.885	24.1917	112.453	422.097	177.985	159.052	271.459	322.266	53.0022
127.178	153.976	118.718	112.59	155.348	178.122	336.169	272.1	155.028	53.0937
356.473	154.296	240.134	113.001	127.635	178.214	202.223	275.301	65.4868	53.1852
233.137	154.708	220.149	113.55	36.7677	178.305	274.02	275.804	202.863	53.3224
245.758	155.257	150.043	113.733	251.886	178.442	172.589	276.993	139.891	53.4138
293.685	156.309	63.5661	113.87	236.749	178.763	63.1545	277.633	313.303	53.4138
314.355	156.72	162.528	113.962	54.1455	178.854	362.921	279.508	270.087	54.237
207.527	157.132	264.828	113.962	402.113	178.945	384.644	280.24	131.339	54.4656
405.908	157.269	6.95111	114.053	69.3739	180.134	46.0969	282.252	5.44199	54.5571
42.3012	157.452	338.684	114.053	112.27	180.226	123.154	283.212	124.754	54.8772
64.7551	157.909	427.814	115.425	289.889	181.689	140.211	283.441	382.54	54.8772
218.137	158.001	348.745	115.745	82.7274	182.65	423.469	283.852	41.3408	55.1059
189.326	158.092	134.403	115.882	100.837	183.93	300.361	284.264	93.337	55.7461
172.177	158.961	398.088	116.614	20.2588	184.022	105.913	284.721	174.83	55.7461
138.931	159.052	108.748	116.706	339.416	185.531	223.396	285.362	115.654	55.929
257.283	159.601	16.2345	117.117	139.8	187.314	27.3471	285.773	360.909	56.0662
82.8189	160.836	207.024	118.077	370.878	187.726	323.547	286.093	404.216	56.2491
372.342	161.385	301.413	118.306	264.051	188.046	6.95111	286.733	373.119	56.3863
14.5425	163.488	200.21	118.489	239.082	188.778	276.673	286.916	217.359	57.0723
95.6235	163.9	49.3895	118.626	358.165	188.778	373.302	287.694	285.956	56.7979
430.878	164.86	289.249	118.718	194.723	188.915	404.445	289.386	346.229	56.8894
389.491	165.501	364.202	119.129	212.1	189.235	209.768	290.118	431.335	57.301
113.321	166.141	229.661	119.266	305.758	189.326	84.0079	291.169	85.6085	57.4381
159.464	166.141	381.031	119.998	168.061	189.555	241.963	293.182	421.137	57.5296
309.69	166.461	276.032	120.73	4.61883	189.967	264.508	293.41	197.284	57.6211
234.097	166.872	410.482	120.73	282.48	190.515	191.75	294.005	327.068	57.6211
122.422	167.833	247.13	121.462	386.747	190.607	151.324	294.233	104.77	57.8497
279.508	168.565	184.662	121.69	323.135	191.75	119.266	295.285	154.388	58.0784
27.1642	168.793	70.2428	121.782	402.936	191.75	170.577	298.029	23.0027	58.1698
324.279	168.885	144.784	121.919	251.383	193.351	339.644	299.721	60.8222	58.1698
415.009	168.885	83.6877	122.33	37.9567	193.899	58.9015	300.041	187.726	58.1698
340.056	169.113	310.422	122.33	146.979	194.22	43.9932	302.831	257.1	58.3985
354.461	169.754	124.114	123.291	224.036	194.494	289.386	303.334	167.741	58.49
71.6148	170.577	4.93895	123.474	50.2126	194.723	10.7468	303.745	33.0635	58.5814
291.672	171.354	39.6488	123.794	77.1025	195.043	427.951	303.974	247.222	58.7186
193.442	171.766	262.496	124.114	424.018	195.134	78.2915	304.203	390.04	58.7186
85.4713	172.406	326.748	124.343	61.3253	195.363	95.4406	305.117	307.358	58.8101
53.7339	172.497	19.1156	125.486	347.144	196.095	358.897	307.129	76.2793	59.1302
137.33	172.497	95.9437	125.486	120.638	196.506	318.699	308.639	149.083	59.1302
258.975	173.046	347.373	125.623	183.519	197.055	224.494	308.822	237.298	59.5418
221.841	173.138	393.104	125.897	294.965	197.375	133.626	308.959	336.169	59.6332
150.501	175.47	216.125	126.035	331.184	198.838	410.161	309.05	355.833	59.7704
103.489	175.561	157.132	126.446	22.271	199.799	273.151	309.462	410.893	59.7704
400.604	175.79	171.446	126.766	133.214	200.439	378.195	309.69	51.3102	59.8619
246.81	175.973	370.147	126.766	262.176	201.399	396.305	311.062	208.076	59.8619
42.0725	176.613	109.526	127.315	93.84	201.628	201.308	311.154	297.114	60.4107
371.427	177.253	338.913	127.315	109.068	202.771	150.364	311.474	398.088	60.4107
210.408	177.345	56.2491	127.635	311.703	203.183	255.088	311.474	99.3278	60.5021
12.759	178.625	234.234	127.818	374.354	203.503	303.883	313.943	229.753	60.8222
180.958	178.763	419.673	128.87	407.097	204.235	57.8497	314.035	316.779	61.0052
270.819	179.586	187.314	129.51	359.766	204.463	342.205	314.995	178.854	61.4625
167.33	179.997	33.0635	129.922	6.72246	205.332	178.945	315.178	108.154	61.5539
0.685965	180.317	322.175	131.339	195.912	206.155	31.1885	315.407	380.619	61.6454
305.026	180.455	404.857	131.614	282.16	206.247	235.789	318.242	16.2345	61.7826
61.6454	181.049	123.062	131.843	206.567	206.384	111.309	320.071	216.765	62.1027
118.718	181.598	142.315	132.071	76.3708	206.887	16.6918	320.163	1.64632	62.2856
234.234	181.918	270.087	132.071	166.369	206.887	123.154	322.907	422.006	62.2856
280.377	182.238	200.439	132.711	35.0757	208.808	290.3	323.364	160.516	62.4228
28.4447	182.65	254.127	132.711	243.198	208.808	3.8414	323.684	267.023	62.4228
198.656	182.787	241.505	133.946	391.96	209.448	159.601	323.776	131.614	62.5143
364.842	182.97	376.595	134.083	338.913	209.768			347.693	63.246
381.442	182.97	289.066	134.586	157.452	210.088			193.671	63.5661
256.871	183.29	359.674	134.586	142.772	210.728			69.3739	63.8862
324.919	183.701	226.506	134.724	65.1667	210.82			140.303	64.1149
94.1601	184.022	82.6359	135.455	224.356	211.643			122.01	64.2063
138.291	184.159	68.1392	135.638	48.3377	212.283			365.894	64.2978
74.0385	185.211	420.954	135.638	22.271	212.832			42.3012	64.435
158.641	185.394	309.142	136.095	321.992	214.113			259.112	64.435
297.709	186.903	279.325	136.416	298.349	214.204			50.3498	64.5265
336.169	187.543	152.924	136.599	424.109	216.445			5.99076	65.2582
414.277	187.634	41.8896	136.827	124.754	217.177			331.184	65.8069
351.489	187.954	216.308	136.919	182.238	217.68			170.257	65.8984
395.116	188.183	52.1334	137.33	263.411	218.228			323.227	65.8984
112.178	188.686	13.3992	137.879	111.95	219.6			76.0507	66.127
224.676	189.098	133.123	137.97	351.077	220.012			276.444	66.2185
47.6974	189.418	389.079	137.97	385.147	220.241			313.623	66.2185
207.756	190.79	115.425	138.108	92.148	220.972			287.694	66.4472
150.364	190.927	1.87497	138.291	209.357	221.201			302.373	66.5386
83.8707	191.018	326.931	138.611	245.53	221.521			235.149	66.8587
311.611	192.71	27.8959	138.748	8.32304	222.161			354.553	67.0417
58.3985	193.031	398.18	138.839	364.522	222.664			91.0962	67.3618
241.323	193.442	166.461	138.931	404.216	223.213			24.6033	67.5904
185.302	193.899	182.65	139.342	292.313	224.173			294.553	67.5904
132.254	193.991	408.561	139.48	154.068	224.356			85.2883	67.6819
33.3836	195.683	353.729	139.8	75.8677	224.494			406.869	67.6819
427.402	196.643	298.258	139.891	277.816	225.865			430.878	67.6819
101.34	196.735	341.016	140.76	32.2404	226.277			225.088	67.8191
323.867	196.826	195.454	141.172	228.061	226.597			391.412	67.8191
20.4875	197.055	256.963	141.355	46.8286	227.009			243.929	67.9106
270.316	197.146	102.62	142.132	60.0905	228.289			200.759	68.002
173.641	197.284	372.571	142.452	134.266	228.792			160.424	68.3221
259.615	197.375	92.5596	143.595	331.093	229.341			149.861	68.4593
355.833	198.335	124.526	144.556	171.034	229.981			13.7193	68.5508
8.50597	198.838	247.222	144.967	419.582	230.621			61.2338	68.8709
286.733	199.616	34.5726	145.059	315.315	231.993			34.5726	68.9624
84.7396	199.707	268.212	145.196	86.3401	232.222			118.398	68.9624
383.592	199.936	170.897	145.287	194.403	232.634			185.622	68.9624
121.462	200.027	210.728	145.287	18.2467	232.954			371.702	69.191
211.552	200.439	72.9867	145.699	374.583	233.685			339.141	69.2825
71.066	201.628	225.225	145.836	101.797	234.966			400.741	69.6026
197.604	202.04	63.7948	146.156	2.46947	235.149			179.586	70.0142
401.473	202.131	332.967	146.339	343.669	235.378			252.435	70.2428
155.12	202.223	8.41451	146.476	258.655	235.789			414.277	70.3343
229.341	202.68	114.19	147.391	116.797	236.338			68.5508	70.5629
53.1852	203.412	308.639	147.848	300.819	236.521			102.437	71.066
419.262	204.372	285.956	148.351	390.863	238.213			210.271	71.066
370.65	205.104	360.498	148.489	208.488	238.853			317.419	71.066
342.205	205.195	144.647	148.58	359.126	239.493			330.544	71.066
145.379	206.796	153.016	149.403	243.198	239.63			43.0329	71.2032
25.6551	206.887	415.558	149.632	282.572	239.813			308.822	71.2032
185.851	207.665	89.7242	149.723	149.22	240.225			269.676	71.3861
109.068	208.396	55.426	149.861	403.713	240.865			196.003	71.5233
301.55	208.716	187.863	150.181	46.9657	242.146			145.516	71.6148
316.047	209.036	427.631	150.181	270.316	243.335			21.1277	72.0263
251.886	210.5	21.2192	150.912	93.5199	243.655			258.883	72.0263
267.984	210.591	319.751	151.232	182.558	244.066			109.617	72.255
37.8653	210.82	234.829	151.415	331.093	244.066			351.077	72.3465
129.419	211.232	373.622	151.873	66.31	244.249			361.458	72.4379
92.3766	212.192	167.01	153.656	224.676	245.118			381.671	72.4379
76.5994	212.603	44.1762	153.976	430.146	245.21			133.443	72.5751
290.758	213.061	267.664	154.479	131.751	245.347			127.727	72.6666
357.845	213.244	349.476	154.479	167.01	246.261			218.137	72.6666
164.449	214.433	119.266	154.937	377.418	246.261			231.902	73.3983
220.012	214.616	133.946	155.257	39.8774	247.862			164.22	74.0385
345.132	214.753	180.958	155.668	316.276	248.594			297.526	74.0385
120.41	214.844	335.391	155.897	297.114	249.143			240.134	74.1757
413.637	215.485	198.427	155.988	415.878	250.103			277.176	74.5873
10.8382	215.805	210.911	155.988	81.9957	251.886			53.4138	74.6787
429.734	215.896	256.139	156.08	3.9786	252.618			27.1642	74.7702
206.155	215.988	310.102	156.08	196.003	252.618			423.286	74.9074
388.759	216.125	393.332	156.08	19.207	252.938			285.362	74.9989
331.184	216.308	241.323	156.492	362.007	252.938			403.988	75.319
277.496	216.445	155.12	156.812	344.949	253.258			341.245	75.6391
173.458	217.817	409.613	156.949	113.23	253.578			93.337	75.8677
64.1149	218.137	98.2759	157.269	216.948	253.67			119.449	75.8677
245.21	218.228	297.938	157.36	283.212	253.807			205.012	76.1879
28.216	218.457	2.46947	157.452	237.07	254.447			73.947	76.2793
235.378	219.6	83.0475	158.092	253.487	254.95			367.266	76.4622
104.633	219.692	380.208	158.092	399.872	255.499			324.416	76.6909
187.543	219.692	223.716	158.504	142.635	256.139			36.2647	77.1025
1.55485	220.972	274.112	158.732	53.8254	257.603			6.95111	77.2397
143.047	221.841	71.9349	159.052	382.86	257.694			173.961	77.3311
53.0937	223.076	29.3593	159.464	177.574	258.014			199.707	77.3311
41.1122	223.305	365.254	159.464	272.1	258.014			391.823	77.3311
373.714	223.305	14.9998	160.013	103.352	259.295			429.734	77.4226
314.858	223.533	61.7826	160.424	66.5386	260.667			190.058	77.6513
197.924	223.853	42.7128	162.116	28.216	261.398			225.545	77.6513
134.495	224.356	284.172	162.116	414.186	261.856			13.8108	77.9714
84.0993	224.676	271.276	162.208	308.639	262.587			64.8466	78.2915
303.425	224.814	422.097	162.437	121.919	263.228			247.359	78.2915
175.653	226.597	112.178	163.077	329.492	263.731			398.912	78.2915
268.212	227.42	394.887	164.54	155.988	264.508			303.425	78.383
219.372	227.878	321.855	164.677	85.6085	265.743			99.1448	78.4744
110.029	228.198	373.714	165.409	364.11	267.664			133.123	78.4744
422.875	228.609	201.719	165.729	225.728	267.984			150.272	78.4744
12.759	229.021	295.605	166.049	203.915	268.532			318.471	78.7031
93.1998	229.021	92.6968	166.141	169.845	269.127			85.8828	79.1146
68.3221	229.112	5.12187	166.369	279.005	270.087			266.063	79.1146
399.689	229.341	357.205	166.781	56.2491	271.917			383.775	79.572
251.475	229.981	244.89	166.872	420.725	272.008			373.439	79.6634
150.364	231.445	131.843	167.33	345.681	272.42			45.2737	79.7549
287.694	231.993	156.4	167.33	398.591	272.42			407.509	79.9835
160.516	232.085	171.537	167.65	22.4082	272.648			181.049	80.075
329.812	232.496	209.951	167.833	260.027	273.151			126.035	80.4866
23.6429	232.954	145.699	167.924	39.8774	274.02			158.412	80.8067
348.562	233.137	55.1059	168.153	186.171	274.02			213.975	80.8067
386.107	233.274	343.577	168.565	101.02	276.261			417.158	80.8067
55.1973	234.006	407.6	169.342	5.76211	276.444			311.382	81.0354
199.067	234.737	333.928	169.433	326.748	276.535			232.405	81.4469
183.061	235.057	184.982	169.616	379.247	276.535			293.502	81.4469
211.78	235.469	25.0149	169.936	294.233	276.673			110.166	81.6756
134.083	236.018	259.523	169.936	146.979	276.856			334.98	81.6756
362.738	237.39	80.3037	170.074	73.6269	277.084			95.6235	82.1786
42.164	238.213	218.96	170.165	110.761	278.136			358.074	82.1786
233.777	238.213	232.634	170.257	215.805	278.776			54.6943	82.6359
123.474	238.67	428.134	170.394	85.8828	279.508			32.8806	82.7274
313.486	239.63	309.142	170.714	312.251	280.377			142.864	82.7274
91.7364	239.813	380.848	170.897	128.458	281.017			274.66	82.7274
67.5904	240.042	114.282	172.909	234.737	282.892			283.349	83.2762
79.6634	240.865	45.5938	173.138	195.363	283.669			347.373	83.6877
377.235	240.865	102.209	173.458	267.023	283.852			3.2469	83.7792
158.961	241.963	287.054	174.189	367.266	284.401			255.088	84.0079
287.145	241.963	364.933	174.281	248.914	285.682			21.1277	84.5109
14.1309	242.146	35.3043	174.83	162.345	285.773			165.18	84.5109
191.979	242.146	393.653	174.83	410.161	286.733			340.696	84.6481
417.158	242.146	145.516	175.333	112.27	286.916			12.4388	85.0597
341.748	243.198	316.138	175.653	33.0635	287.236			238.762	85.0597
175.241	243.518	89.587	175.881	179.357	288.837			426.762	85.0597
29.2678	243.655	16.0516	176.202	393.653	288.837			73.0782	85.1511
274.249	243.838	72.5751	176.522	349.796	289.249			390.863	85.4713
111.309	244.387	202.04	176.75	332.967	289.477			136.599	85.6999
242.374	245.347	63.5661	177.162	289.249	290.3			219.28	85.7914
401.061	245.347	271.459	177.253	136.507	290.849			82.8189	85.8828
220.652	246.079	412.585	177.253	19.0241	291.261			331.275	86.1115
259.295	246.079	177.574	178.214	63.5661	291.901			118.398	86.6603
297.846	246.079	191.43	178.214	46.9657	292.221			199.159	86.6603
139.159	246.17	137.147	178.442	76.1879	292.953			250.103	86.6603
45.7767	247.862	121.37	179.174	201.948	293.09			171.949	86.8432
208.808	248.914	427.311	179.814	219.692	294.233			262.816	86.9804
57.6211	249.874	340.284	179.906	93.7486	295.102			148.58	87.0718
322.404	250.194	164.997	180.134	378.287	296.474			208.716	87.0718
366.763	251.658	300.59	180.134	315.315	297.938			63.8862	87.392
388.439	252.207	326.519	180.226	424.018	298.029			319.34	87.392
123.885	252.298	372.891	180.637	396.579	298.349			407.921	87.4834
185.073	252.298	97.4528	181.598	104.45	298.578			157.36	87.8035
70.8831	252.618	386.244	182.558	2.37801	299.309			223.716	88.1237
352.357	253.67	250.835	182.787	255.179	299.721			417.661	88.1237
14.5425	254.127	79.0232	182.878	272.1	300.041			375.543	88.3523
150.592	255.682	226.277	183.29	239.173	301.322			362.83	88.4438
241.734	255.911	242.557	183.519	302.373	301.413			91.4163	88.9925
291.672	256.551	363.379	183.93	361.458	301.55			109.297	89.1755
100.608	257.374	153.336	184.25	180.546	301.87			129.327	89.1755
196.643	257.374	108.657	184.342	35.3043	302.053			49.3895	89.4041
230.53	257.831	308.227	184.662	146.476	302.511			295.834	89.587
411.945	257.923	349.934	184.799	124.983	303.242			357.022	89.7242
25.8838	258.152	26.2953	184.982	163.397	304.523			181.506	90.1358
168.565	258.152	7.13404	185.211	346.321	304.614			234.326	90.1358
310.559	258.334	407.189	185.211	331.275	305.575			99.4649	90.2273
90.8675	259.706	395.436	185.302	196.963	305.666			347.693	90.3645
424.658	260.027	203.503	185.622	407.418	307.907			426.442	90.3645
339.233	260.347	63.6576	186.491	21.2192	308.318			27.3471	90.4559
184.022	260.575	215.485	186.491	65.6697	308.959			39.6488	90.5474
80.8067	261.216	179.174	186.583	229.432	310.971			381.351	90.6846
131.522	261.536	128.23	186.765	211.46	311.062			189.646	91.0962
210.088	261.856	419.17	186.903	47.0572	311.931			286.413	91.4163
256.642	262.039	42.8042	187.223	247.222	312.663			303.974	91.4163
41.8896	262.587	273.38	187.406	287.968	312.846			339.416	91.5078
374.491	262.587	118.398	187.543	76.3708	313.074			271.368	91.7364
222.161	262.908	52.2248	187.863	310.742	313.303			120.73	91.8279
274.523	263.959	330.864	189.555	91.8279	314.035			75.4104	92.2394
57.2095	264.28	93.84	190.195	111.858	314.264			279.325	92.2394
402.844	264.92	287.694	190.195	7.27123	315.727			323.044	92.3766
114.282	265.331	165.501	190.287	387.708	315.818			365.482	92.4681
391.32	265.423	189.646	190.515	428.682	315.818			59.2217	92.5596
1.00608	267.664	316.276	191.567	158.001	316.459			19.0241	93.0169
173.549	267.664	340.376	192.07	267.115	317.51			243.929	93.1998
289.569	268.715	137.879	192.207	353.501	318.379			5.76211	93.337
194.723	269.767	81.1268	192.299	370.65	318.791			313.806	93.337
322.815	269.767	263.228	192.299	129.327	319.111			197.924	93.5199
25.0149	269.996	155.348	192.802	171.857	319.66			167.421	93.6114
138.108	270.225	103.901	193.122	58.7186	319.843			391.96	93.84
66.6301	270.956	36.036	193.259	145.196	319.843			155.12	94.0687
153.656	271.276	246.81	193.351	41.4323	320.163			34.6641	94.1601
102.849	272.42	376.503	193.579	224.814	321.443			204.235	94.4803
362.418	272.648	200.439	193.762	189.098	321.992			252.527	94.4803
415.42	273.289	357.982	193.762	340.833	322.175			332.967	94.7089
78.4744	273.38	26.8441	195.134	325.971	322.907			82.1786	95.4406
127.086	274.02	300.041	195.134	414.277	323.547			352.998	95.4406
373.302	274.02	234.234	195.592	303.014	323.867			298.029	95.7607
339.233	274.249	126.126	195.683	99.5564	324.096			400.924	95.7607
305.758	274.34	70.8831	195.774					54.5571	95.9437
243.746	274.523	420.725	196.232					227.329	96.1723
90.5474	276.352	1.00608	196.643					422.966	96.2638
34.4355	276.444	215.256	196.643					160.973	96.401
13.9022	276.535	385.284	197.467					413.134	96.401
220.972	276.535	52.5449	198.335					68.2307	96.5839
266.292	276.673	191.247	198.518					373.942	96.7211
389.491	277.953	175.058	199.296					142.955	96.8125
406.229	277.953	17.1949	199.707					174.098	96.904
187.406	278.456	112.27	199.799					182.238	96.904
284.721	278.456	399.872	200.119					43.6731	97.1327
234.829	279.096	63.246	200.988					260.667	97.2241
116.294	279.737	246.582	201.171					107.925	97.4528
205.332	279.737	408.972	201.948					220.149	97.7729
172.406	279.965	273.38	202.543					361.549	98.4131
318.562	280.377	89.1755	202.771					99.968	98.7333
51.9047	281.109	345.909	202.771					133.123	98.8247
357.662	281.429	367.906	202.863					271.048	98.8247
153.976	281.657	26.7069	203					188.778	98.9162
344.309	282.252	324.096	203					11.4785	99.4649
24.8319	283.349	147.528	203.32					304.934	99.8765
4.29871	283.852	206.567	203.64					246.079	99.968
260.804	284.584	221.612	203.64					290.849	100.105
139.251	285.956	99.7851	203.732					124.526	100.197
328.44	287.054	37.9567	204.372					239.493	100.197
102.849	287.465	78.4744	204.463					382.083	100.197
75.319	287.785	285.773	204.555					90.0444	100.517
63.9777	288.288	159.373	204.875					278.365	100.517
274.112	288.608	296.017	205.835					337.403	100.745
428.362	289.98	330.452	206.476					346.001	100.745
237.298	290.118	136.095	206.704					370.01	100.745
126.858	290.209	426.67	207.344					114.282	100.837
253.99	290.209	266.52	207.756					312.754	100.928
218.457	290.3	236.338	207.939					210.591	101.34
413.317	290.438	128.138	208.259					430.603	101.98
397.54	290.529	4.16152	208.396					30.9599	102.849
360.086	290.849	46.5084	208.808					327.48	102.941
297.526	291.261	312.343	208.808					74.2672	103.261
91.0962	291.901	254.31	209.357					62.4228	103.352
195.912	292.45	16.2345	211.049					408.332	103.352
383.363	292.861	352.998	211.369					139.068	103.581
42.3012	293.273	58.0784	211.552					196.095	103.672
178.442	293.41	193.991	211.552					148.992	103.992
15.0912	294.142	112.773	211.78					155.577	104.45
162.757	294.142	386.564	211.872					168.885	104.45
306.809	294.553	185.622	212.1					48.2005	104.541
147.94	294.874	400.832	212.192					80.6238	104.541
53.0022	295.605	417.981	212.924					299.401	104.541
284.264	296.154	168.244	213.061					6.95111	104.633
33.9324	297.206	210.911	213.564					262.176	104.861
114.693	297.389	367.403	213.975					392.464	104.953
335.711	298.349	92.7882	214.433					17.4235	105.364
228.609	298.486	380.619	214.433					36.9964	105.364
353.958	298.989	176.842	215.164					117.254	105.593
71.7062	299.309	202.36	215.805					251.886	105.684
136.736	300.361	224.356	215.805					385.284	105.913
83.6877	300.498	78.6116	215.896					179.814	106.004
184.57	300.498	243.198	216.125					204.372	106.004
389.72	300.59	295.925	216.536					339.873	106.004
205.652	301.002	31.6916	216.628					104.861	106.142
100.288	301.642	2.46947	216.856					273.38	106.142
371.839	301.962	336.992	217.177					311.291	106.142
262.496	302.511	101.98	217.908					125.897	106.325
405.268	302.922	279.645	218.32					96.1723	106.462
25.5636	303.014	309.142	218.548					187.634	106.736
214.936	303.334	147.848	218.777					227.009	106.873
321.443	303.654	257.923	219.097					0.868889	107.056
171.628	304.386	19.1156	219.28					235.469	107.056
0.91462	304.706	395.848	219.509					375.635	107.193
307.038	304.934	69.5111	219.6					218.777	107.285
247.45	305.758	271.917	219.829					418.073	107.285
154.068	306.215	43.5817	220.469					354.049	107.376
238.67	306.398	229.341	221.521					427.311	107.834
55.1973	306.947	127.818	222.161					54.8772	107.925
279.828	307.267	137.467	222.573					85.2883	107.925
111.721	308.547	115.745	222.664					245.53	108.474
38.3683	309.462	238.853	222.893					65.2582	108.748
386.976	310.102	324.416	223.213					283.121	108.748
124.022	310.651	190.698	223.945					400.284	108.886
345.269	311.703	361.046	224.265					344.309	109.068
163.488	311.931	94.7089	224.356					143.504	109.297
424.338	313.166	178.763	224.814					319.751	109.297
139.891	313.395	166.141	224.905					330.452	109.297
297.297	313.623	27.6673	224.997					290.438	109.937
84.1908	313.806	52.2248	225.317					26.9356	110.349
14.2223	314.538	218.96	225.408					362.921	110.669
68.1392	315.498	347.053	225.545					74.3586	110.898
192.39	315.498	79.8921	225.728					39.2372	111.218
332.967	315.727	410.802	225.728					132.163	111.309
315.498	315.818	202.863	225.865					172.909	111.309
176.11	316.367	300.819	225.865					164.997	111.721
395.024	316.687	380.528	226.506					267.115	111.721
253.807	316.87	427.493	226.78					211.643	111.95
221.704	317.419	337.541	227.1					393.653	112.178
282.572	317.419	152.467	227.558					152.696	112.27
99.968	317.51	37.8653	227.649					195.043	112.27
203.503	317.51	263.091	227.74					369.278	112.27
359.537	317.648	3.42983	228.198					10.0151	112.681
271.596	318.151	313.943	228.381					300.041	112.91
149.083	319.98	287.054	228.929					410.253	112.91
6.08222	320.071	369.827	229.021					50.2126	113.321
303.974	320.391	65.9898	229.981					111.538	113.413
233.274	320.574	144.556	231.353					204.692	113.642
49.1608	320.712	210.271	231.993					185.531	114.053
409.521	321.032	48.4291	232.314					33.2922	114.19
85.4713	321.763	14.1309	232.634					91.4163	114.373
381.991	321.992	397.677	232.634					383.272	114.373
133.626	322.084	251.978	232.725					100.197	114.602
371.199	322.404	116.614	233.274					256.78	114.602
243.655	322.495	96.904	233.594					316.779	114.602
114.922	324.279	81.0354	234.326					57.5296	115.013
422.875	324.324	279.188	234.417					353.318	115.105
30.1367	324.69	353.638	234.829					232.496	115.242
		190.927	234.966					283.349	115.562
		158.001	235.057					224.494	115.654
		177.802	235.378					82.7274	115.745
		31.8288	235.469					277.724	115.745
		227.237	235.606					418.85	115.745
		389.171	235.789					323.227	116.065
		238.533	236.749					118.489	116.202
		106.462	236.841					343.257	116.477
		58.3985	237.07					403.073	116.477
		70.2428	237.618					21.3107	116.614
		333.105	238.533					305.758	116.797
		132.711	238.67					125.074	117.346
		167.65	238.67					375.543	117.437
		268.395	238.853					3.01825	117.574
		310.834	238.99					428.042	117.574
		201.628	239.173					65.1667	117.757
		323.227	240.042					137.33	117.895
		408.561	240.042					163.488	118.077
		382.723	240.134					171.628	118.169
		421.366	241.002					389.628	118.306
		7.77427	241.323					190.378	118.398
		293.685	242.237					293.822	118.398
		346.824	242.466					216.125	118.489
		210.82	243.335					147.3	118.718
		142.864	243.655					242.146	118.809
		36.5848	243.746					271.917	118.809
		102.62	243.838					250.286	118.946
		258.655	243.838					334.248	118.946
		83.4591	244.387					203.412	119.266
		158.001	245.027					73.3068	119.77
		48.3377	245.347					261.536	120.09
		372.662	245.941					178.214	120.181
		20.9905	246.079					397.128	120.181
		397.86	246.399					15.4114	120.41
		360.269	246.582					154.708	120.638
		115.242	246.719					41.9811	120.73
		178.763	247.542					357.982	120.959
		125.715	247.679					212.192	121.462
		278.045	248.594					24.7405	121.69
		228.792	248.731					50.67	122.01
		245.941	249.051					367.083	122.01
		196.095	249.371					415.741	122.01
		67.9106	249.874					97.2241	122.422
		340.056	250.514					290.209	122.422
		11.387	250.743					88.5352	122.742
		95.212	251.155					331.275	122.742
		27.8045	252.527					231.262	122.971
		55.929	252.755					408.561	123.291
		260.164	252.938					350.117	123.382
		325.696	252.938					220.789	123.474
		293.182	253.167					313.395	123.611
		309.782	253.258					57.301	123.702
		133.763	253.578					380.208	124.022
		180.317	253.578					106.645	124.114
		168.382	253.807					184.57	124.114
		147.848	254.219					276.352	124.114
		418.713	254.447					8.00293	124.434
		86.9804	254.859					128.87	124.754
		378.058	255.27					67.3618	124.846
		388.851	255.911					424.978	124.846
		220.652	256.231					112.91	124.983
		356.062	256.322					302.922	124.983
		236.429	257.191					242.374	125.074
		4.80176	257.603					139.48	125.394
		206.476	257.831					77.011	125.623
		64.8466	258.152					320.483	125.623
		42.8042	258.563					33.5208	125.715
		409.521	258.883					162.757	126.126
		255.911	259.203					173.961	126.126
		117.346	260.027					121.69	126.218
		300.178	260.027					22.271	126.446
		397.86	260.027					200.759	126.538
		334.888	260.484					256.322	126.995
		274.02	260.667					295.285	127.086
		194.494	260.987					398.5	127.407
		77.5598	262.039					341.976	127.498
		107.925	262.039					42.3926	127.727
		22.8198	262.359					267.252	127.727
		154.617	263.319					249.234	127.91
		319.431	263.319					284.584	128.23
		366.946	263.411					237.71	129.007
		285.362	263.548					216.536	129.099
		244.569	264.051					373.211	129.099
		129.327	264.188					388.759	129.099
		419.902	264.188					362.83	129.327
		347.922	264.28					91.7364	129.602
		166.552	264.6					191.247	129.602
		226.048	264.6					84.0079	129.739
		264.508	265.24					353.729	129.83
		185.394	265.331					51.3102	130.059
		34.344	265.651					62.1942	130.15
		99.1448	265.972					100.928	130.15
		376.366	266.292					347.373	130.242
		9.1462	266.612					381.671	130.379
		201.079	267.115					407.6	130.379
		59.8619	268.212					310.742	130.471
		140.943	268.807					144.647	130.562
		306.398	269.036					274.432	130.791
		211.963	269.584					334.339	130.791
		51.0815	269.767					127.635	131.339
		83.6877	270.819					228.518	131.339
		176.43	271.139					34.8928	131.522
		390.68	271.276					153.336	131.522
		334.248	271.368					181.278	131.934
		294.462	271.459					414.826	132.391
		122.193	271.917					110.166	133.032
		312.023	272.328					210.591	133.214
		355.65	272.648					7.59135	133.535
		2.14936	272.968					169.616	133.763
		17.0119	273.929					425.07	133.763
		407.829	274.112					195.683	133.946
		157.452	274.249					220.241	134.083
		94.4803	274.34					325.239	134.266
		270.956	274.66					14.3595	134.403
		195.912	274.843					162.345	134.403
		225.957	275.072					391.823	134.495
		68.6422	275.301					135.318	134.815
		250.743	275.484					291.261	135.044
		164.86	276.261					317.51	135.044
		237.618	276.261					28.4447	135.135
		31.5087	277.724					302.694	135.135
		366.946	277.816					337.861	135.135
		144.236	278.136					401.473	135.547
		375.635	278.227					254.219	135.638
		395.345	278.365					73.2153	135.775
		322.084	279.645					264.371	135.958
		134.175	280.148					370.01	136.187
		415.329	280.697					118.946	136.599
		109.297	280.788					91.7364	136.919
		259.615	281.017					244.707	137.056
		292.45	281.2					203.091	137.467
		97.0412	282.069					100.425	137.559
		403.713	282.252					173.458	137.788
		119.449	282.572					282.48	137.879
		85.6085	282.892					381.58	137.97
		186.034	282.892					44.4963	138.108
		285.224	282.892					356.793	138.108
		22.4997	283.212					418.393	138.428
		333.288	284.172					68.002	139.159
		12.1187	284.401					79.1146	139.159
		55.6089	284.401					57.0266	139.342
		356.29	284.721					144.647	139.8
		44.6335	284.904					186.354	139.8
		341.976	284.904					366.854	139.8
		307.267	285.133					223.533	139.983
		211.369	285.224					269.584	140.12
		245.347	285.453					347.601	140.44
		273.7	285.682					231.582	140.531
		427.493	286.276					122.193	140.76
		195.774	286.916					249.143	141.034
		172.406	287.054					309.142	141.355
		71.2946	287.236					334.568	141.355
		153.107	287.465					17.2863	141.492
		221.064	287.465					212.1	141.492
		383.683	288.105					324.507	141.583
		204.235	290.438					111.218	141.812
		417.89	290.529					138.839	141.812
		401.381	290.621					259.386	141.903
		38.597	291.581					407.418	141.995
		130.471	291.81					48.5206	142.223
		235.286	291.81					37.3165	142.452
		258.655	292.633					300.361	142.452
		319.34	292.861					95.4406	142.635
		294.782	293.41					281.429	142.772
		144.327	293.502					387.708	142.864
		82.4987	293.913					29.1764	142.955
		189.006	294.005					131.339	142.955
		0.503041	294.325					151.553	142.955
		113.87	294.325					423.926	143.047
		28.3075	295.285					162.345	143.184
		273.06	295.377					291.261	143.184
		334.156	295.377					317.419	143.184
		349.705	295.377					8.82608	143.275
		388.851	295.514					354.69	143.687
		8.09439	295.697					84.9682	143.824
		73.3983	295.925					339.964	143.824
		369.827	295.925					399.369	144.236
		359.537	296.337					218	144.647
		59.2217	296.566					195.774	144.876
		226.917	297.114					239.722	144.967
		249.646	297.114					186.262	145.196
		305.117	297.206					202.68	145.379
		98.093	297.709					372.479	145.836
		178.534	297.938					177.802	146.248
		18.5668	298.166					327.8	146.339
		163.397	298.166					56.0662	146.568
		211.963	300.27					368.226	146.568
		409.11	300.27					165.318	146.659
		380.939	300.681					18.4753	146.888
		427.631	300.91					267.343	147.711
		286.413	301.322					74.5873	147.848
		40.9293	301.962					390.131	147.848
		51.0815	301.962					31.9202	147.94
		196.643	302.282					333.928	148.168
		234.417	302.282					107.056	148.351
		266.612	302.282					65.8984	148.489
		400.421	302.694					123.291	149.312
		119.587	303.105					256.322	149.54
		311.474	303.105					12.1187	149.861
		326.108	303.105					228.061	149.861
		341.428	303.654					155.12	149.952
		109.709	303.974					409.11	150.043
		90.3645	304.065					246.079	150.181
		420.725	304.203					297.206	150.181
		135.638	304.523					44.8164	150.592
		151.553	305.575					348.242	150.592
		29.9081	305.758					146.659	150.684
		180.958	306.535					182.467	150.684
		391	308.227					114.922	151.004
		161.934	308.547					314.995	151.004
		173.046	308.822					380.848	151.004
		250.194	308.959					429.963	151.095
		4.71029	309.599					237.161	151.324
		76.2793	309.69					289.386	151.415
		278.776	309.782					417.661	151.415
		297.114	309.782					402.433	151.553
		18.5668	310.742					130.791	151.644
		239.082	310.834					281.749	151.964
		141.034	311.291					97.5442	152.056
		208.899	311.291					206.887	152.056
		365.894	311.291					307.907	152.056
		55.6089	311.703					363.15	152.193
		95.8522	311.703					4.16152	152.376
		65.6697	312.663					136.736	152.467
		43.1243	312.754					190.378	152.924
		351.489	313.166					222.344	152.924
		192.07	313.303					80.6238	153.016
		131.614	313.623					91.3248	153.016
		222.893	313.806					201.308	153.107
		264.691	313.943					26.2039	153.245
		379.019	314.264					68.2307	153.245
		323.547	314.538					214.524	153.748
		418.942	314.767					341.656	153.748
		155.577	315.178					38.2769	154.068
		310.422	315.315					160.333	154.296
		106.233	315.407					170.577	154.296
		291.261	317.51					271.368	154.296
		408.469	318.562					57.5296	154.799
		122.193	319.202					321.763	155.12
		333.516	319.34					371.29	155.257
		395.436	320.071					48.5206	155.44
		206.567	320.483					351.809	155.577
		231.033	320.483					124.114	155.988
		32.5605	320.574					18.2467	156.492
		181.918	320.803					329.08	156.629
		427.402	320.803					420.862	156.949
		280.56	320.894					9.2834	157.04
		344.72	320.894					260.164	157.04
		73.3983	321.123					301.642	157.04
		22.9112	321.672					388.439	157.04
		169.113	321.672					249.554	157.452
		256.871	321.763					131.614	157.681
		142.635	321.992					115.013	157.909
		386.015	322.907					268.212	157.909
		48.109	323.135					105.501	158.184
		273.7	323.135					398.271	158.184
		7.45415	323.227					149.54	158.412
		88.0322	323.547					210.271	158.732
		300.041	323.776					413.134	158.824
		216.765	324.187					308.547	159.464
		312.251	324.187					167.65	159.693
		241.185	324.462					31.1885	159.784
								141.675	160.013
								336.352	160.104
								74.7702	160.333
								176.202	160.333
								287.465	160.333
								294.325	160.333
								316.047	160.333
								194.311	160.653
								0.868889	161.065
								97.9558	161.065
								53.9169	161.385
								406.549	161.385
								242.466	161.476
								233.045	161.705
								359.766	161.934
								277.404	162.025
								378.058	162.025
								64.6179	162.437
								156.4	162.528
								10.1066	162.665
								328.211	162.665
								343.348	162.665
								26.7069	162.757
								87.7121	162.848
								203.091	163.077
								265.651	163.397
								125.623	163.488
								366.626	163.808
								71.9349	163.9
								417.57	164.449
								42.9414	164.677
								304.523	164.997
								185.211	165.089
								424.43	165.089
								255.591	165.409
								138.519	165.821
								350.254	166.232
								83.6877	166.369
								238.441	166.872
								246.81	166.872
								227.969	167.01
								18.2467	167.193
								94.8004	167.833
								149.54	167.924
								375.223	168.061
								297.846	168.244
								105.684	168.473
								174.189	168.473
								162.985	168.565
								115.654	168.702
								289.797	168.702
								359.217	168.885
								273.7	169.113
								392.555	169.113
								318.562	169.205
								212.741	169.616
								282.709	169.616
								410.573	169.754
								223.396	170.074
								384.003	170.485
								399.369	170.485
								32.6519	170.577
								47.6974	170.577
								311.703	171.125
								58.5814	171.217
								132.711	171.217
								7.68281	171.354
								197.467	171.354
								88.5352	171.446
								187.223	171.446
								265.423	171.446
								348.973	171.446
								145.516	171.766
								416.289	171.857
								206.155	171.949
								37.8653	172.177
								252.115	172.406
								335.528	172.406
								367.494	172.817
								153.976	172.909
								18.2467	173.229
								121.599	173.641
								234.097	173.641
								66.5386	173.961
								177.985	173.961
								76.2793	174.098
								26.7069	174.51
								304.294	174.601
								273.929	174.83
								426.853	174.83
								117.117	175.15
								57.0266	175.333
								108.154	175.881
								360.177	175.881
								386.839	175.881
								326.931	175.973
								376.183	175.973
								240.362	176.202
								339.873	176.202
								294.005	176.293
								169.205	176.613
								46.8286	177.162
								193.671	177.162
								283.441	177.345
								82.9561	177.482
								97.5442	177.482
								226.277	177.574
								163.626	177.665
								138.931	177.802
								214.936	177.802
								257.191	177.985
								317.831	178.214
								184.479	178.305
								346.55	178.625
								394.476	178.625
								147.208	178.945
								102.529	179.174
								203.412	179.174
								310.742	179.357
								408.332	179.586
								366.214	179.677
								29.9995	179.906
								22.4082	180.134
								4.39018	180.226
								90.0444	181.278
								334.888	181.278
								430.603	181.278
								245.53	181.369
								264.508	181.369
								72.1635	181.918
								415.238	181.918
								13.4906	182.009
								157.269	182.009
								175.79	182.147
								130.242	182.467
								39.8774	182.558
								424.75	182.558
								140.943	182.97
								122.422	183.381
								354.461	183.381
								112.681	183.519
								64.1149	183.61
								192.39	183.839
								217.588	183.839
								273.929	183.93
								164.22	184.159
								300.498	184.982
								399.369	185.073
								44.4963	185.211
								320.574	185.302
								86.1115	185.394
								291.078	185.394
								208.076	185.531
								233.365	185.531
								283.532	185.714
								327.571	185.714
								96.7211	186.171
								388.988	186.354
								77.5598	186.491
								375.314	186.583
								133.535	187.086
								251.383	187.086
								153.107	187.223
								34.344	187.406
								56.4778	187.634
								181.826	187.634
								309.919	187.726
								243.106	187.863
								198.747	188.275
								407.28	188.275
								426.99	188.686
								9.69497	188.778
								343.577	189.235
								170.805	189.646
								227.878	189.646
								276.352	189.646
								63.8862	189.738
								158.961	190.287
								349.476	190.378
								106.325	190.607
								418.85	190.927
								51.4017	191.018
								140.44	191.018
								362.098	191.11
								127.315	191.247
								332.464	191.247
								267.435	191.339
								19.6186	191.567
								217.268	191.567
								379.43	191.567
								294.233	191.659
								29.0392	191.75
								116.294	191.75
								302.511	191.979
								70.9745	192.299
								369.186	192.482
								256.322	192.71
								396.305	192.71
								189.875	192.939
								96.2638	193.351
								166.232	193.579
								209.86	194.22
								3.10971	194.311
								316.138	194.494
								325.971	194.631
								285.865	194.723
								177.482	194.814
								11.7071	195.363
								81.4469	195.363
								134.906	195.774
								274.523	195.774
								247.45	196.232
								359.034	196.643
								264.508	196.826
								193.259	197.284
								341.565	197.375
								64.938	197.467
								87.0718	197.467
								106.004	197.924
								26.9356	198.015
								74.4501	198.015
								149.861	198.015
								226.277	198.107
								36.1732	198.335
								251.383	198.335
								389.491	198.335
								406	198.427
								371.107	198.656
								413.317	198.656
								56.1577	198.976
								115.013	198.976
								158.321	199.159
								309.919	199.296
								125.897	199.479
								216.628	199.707
								350.437	199.799
								97.8644	199.936
								430.146	200.027
								140.943	200.21
								240.545	200.439
								202.131	200.53
								11.1584	200.668
								168.702	200.759
								46.6456	200.851
								325.971	200.851
								279.096	200.988
								377.555	201.079
								233.914	201.399
								298.806	201.811
								1.41766	201.948
								184.25	202.04
								18.1552	203.091
								423.606	203.091
								176.43	203.183
								266.932	203.412
								130.242	203.64
								332.876	203.64
								387.799	203.64
								305.666	203.732
								289.797	204.143
								209.951	204.235
								120.73	204.463
								102.437	204.783
								394.567	205.104
								317.099	205.332
								81.9957	205.515
								149.723	205.744
								257.374	205.744
								59.4503	205.835
								189.235	205.927
								199.296	205.927
								30.3197	206.064
								69.3739	206.064
								93.1083	206.064
								274.752	206.064
								111.721	206.155
								246.902	206.247
								40.4719	206.384
								139.8	206.476
								403.896	206.476
								222.344	206.796
								50.4413	207.024
								356.153	207.527
								171.628	207.756
								87.1633	207.847
								17.8351	208.168
								376.686	208.396
								343.577	208.488
								411.625	208.579
								295.605	208.808
								417.25	208.808
								161.796	209.036
								363.058	209.128
								213.381	209.539
								319.34	209.631
								285.865	209.768
								229.112	209.951
								426.35	210.18
								78.1543	210.728
								27.3471	210.82
								332.007	210.82
								8.73462	211.369
								204.372	211.963
								369.689	211.963
								66.7215	212.1
								124.343	212.421
								310.331	212.603
								133.123	212.832
								244.89	212.924
								146.019	213.061
								349.476	213.152
								179.906	213.381
								260.027	213.381
								279.828	213.381
								195.912	213.472
								238.35	213.975
								269.584	213.975
								304.934	213.975
								113.413	214.113
								17.6064	214.204
								32.2404	214.204
								105.364	214.433
								158.504	214.433
								186.583	214.524
								394.156	214.616
								59.1302	214.753
								383.683	214.753
								43.9932	215.576
								94.4803	215.667
								253.99	215.805
								51.5846	215.896
								361.046	215.896
								338.684	215.988
								141.034	216.628
								210.728	216.765
								227.878	216.765
								315.956	216.948
								402.113	216.948
								70.9745	217.085
								417.89	217.085
								118.626	217.497
								325.696	218
								355.833	218.32
								240.362	218.457
								5.44199	218.548
								88.0322	218.96
								216.948	218.96
								290.621	219.28
								80.8067	219.509
								344.08	219.509
								129.739	219.6
								166.872	219.692
								370.147	219.692
								21.6308	219.829
								150.181	219.92
								249.874	220.241
								408.561	220.241
								201.171	220.469
								274.752	220.469
								297.114	220.561
								175.79	220.789
								334.248	220.789
								36.036	220.972
								378.378	221.292
								98.7333	221.384
								258.152	221.521
								193.442	221.612
								47.606	221.704
								389.308	221.841
								182.33	221.933
								308.822	221.933
								158.824	222.161
								223.533	222.253
								106.873	222.344
								423.469	222.344
								30.2282	222.664
								265.011	223.076
								283.349	224.036
								12.5303	224.494
								66.6301	224.814
								231.445	224.905
								169.754	224.997
								89.1755	225.225
								430.878	225.637
								414.826	225.728
								396.488	225.865
								138.519	226.048
								317.19	226.369
								324.507	226.369
								243.929	226.597
								127.635	227.649
								361.778	227.649
								40.7921	227.74
								406.137	227.74
								274.02	227.969
								206.476	228.198
								373.622	228.289
								383.043	228.381
								350.117	228.518
								213.975	228.609
								288.929	228.792
								96.5839	228.929
								197.146	228.929
								72.1635	229.112
								115.105	229.25
								255.499	229.25
								80.8067	229.341
								162.437	229.432
								302.282	229.432
								154.617	229.89
								188.915	229.89
								280.88	230.073
								338.592	230.21
								7.13404	230.301
								33.2922	230.53
								26.6154	230.621
								50.4413	230.713
								296.977	230.804
								130.379	231.125
								177.894	231.353
								106.645	231.902
								309.279	231.902
								424.247	232.222
								60.0905	232.314
								220.332	232.314
								236.246	232.314
								228.792	232.405
								202.68	232.634
								243.198	232.634
								262.587	232.634
								379.979	232.954
								67.0417	233.045
								90.4559	233.365
								367.403	233.365
								137.879	233.594
								409.293	233.685
								393.653	233.914
								332.144	234.097
								357.022	234.097
								122.01	234.234
								110.029	234.966
								170.897	235.926
								10.198	236.109
								416.381	236.109
								348.836	236.521
								399.872	236.521
								146.019	236.658
								23.0027	236.749
								286.413	236.841
								45.045	237.161
								315.315	237.161
								96.7211	237.39
								191.567	237.618
								325.971	237.938
								34.344	238.03
								160.516	238.121
								271.048	238.213
								337.952	238.35
								16.7833	238.441
								153.428	238.441
								84.6481	238.533
								184.662	238.533
								261.398	238.762
								51.0815	239.402
								212.1	239.402
								396.717	239.493
								220.012	239.951
								73.3068	240.042
								0.594503	240.134
								179.677	240.134
								126.675	240.225
								373.302	240.454
								228.061	240.545
								116.202	240.682
								424.658	240.682
								297.114	240.774
								387.067	241.094
								104.45	241.185
								135.867	241.505
								277.084	241.643
								37.7281	241.734
								61.4625	241.734
								167.833	242.466
								237.07	242.466
								304.065	242.786
								411.625	243.335
								197.695	244.066
								281.84	244.387
								310.559	244.387
								381.259	244.569
								354.141	244.707
								7.86573	244.89
								246.399	244.89
								146.248	245.438
								320.391	245.85
								203.915	246.079
								403.485	246.17
								85.7914	246.261
								69.6026	246.49
								76.0507	246.582
								292.541	246.582
								341.976	246.81
								363.379	246.81
								97.3156	247.039
								51.4931	247.222
								325.696	247.45
								61.2338	247.542
								335.117	247.542
								238.853	247.679
								420.634	247.679
								213.381	247.771
								426.442	248.182
								169.616	248.502
								22.4997	248.594
								133.443	249.051
								14.451	249.371
								372.799	249.371
								108.565	249.463
								117.254	249.463
								142.315	249.463
								255.179	249.463
								270.225	249.783
								222.801	249.874
								262.496	249.874
								391.412	249.874
								348.973	250.286
								399.78	250.286
								126.766	250.423
								303.654	250.423
								189.098	250.606
								30.8684	250.743
								150.775	251.155
								356.153	251.246
								287.374	251.475
								40.4719	251.658
								412.174	251.795
								230.393	251.886
								248.502	252.618
								88.5352	252.755
								208.168	252.847
								382.54	252.938
								161.705	253.487
								64.435	253.578
								312.846	253.578
								102.529	254.127
								199.067	254.31
								319.431	254.31
								274.432	254.447
								47.1487	254.63
								29.588	254.859
								392.692	255.088
								7.27123	255.362
								266.063	255.362
								336.26	255.362
								94.7089	255.499
								304.065	255.591
								426.579	255.591
								295.605	256.002
								58.0784	256.139
								77.9714	256.139
								171.628	256.231
								191.11	256.322
								109.206	256.551
								70.0142	256.642
								182.65	256.642
								365.894	256.642
								258.014	256.78
								118.946	256.963
								326.428	256.963
								135.318	257.694
								246.17	257.694
								19.5271	257.831
								349.293	258.152
								124.983	258.243
								144.967	258.243
								154.799	258.334
								357.845	258.792
								341.016	258.883
								418.53	259.112
								72.3465	259.386
								215.805	259.386
								376.824	259.523
								387.799	259.706
								223.853	259.844
								161.705	259.935
								278.227	260.027
								35.533	260.484
								15.9144	260.575
								287.557	260.895
								46.5084	260.987
								84.9682	260.987
								312.983	260.987
								402.296	260.987
								177.162	261.078
								239.31	261.078
								196.415	261.307
								303.014	261.398
								294.325	261.627
								4.48164	262.359
								169.342	262.359
								93.4285	262.816
								230.21	262.908
								409.201	262.908
								139.663	263.548
								202.68	263.639
								369.278	263.731
								101.66	263.868
								211.963	264.051
								59.9534	264.188
								322.084	264.6
								430.878	264.691
								395.116	265.011
								79.2518	265.423
								424.43	265.743
								251.383	265.972
								134.495	266.063
								267.755	266.063
								149.403	266.2
								314.355	266.2
								27.1642	266.292
								66.9502	266.52
								333.836	266.703
								259.386	266.932
								342.525	267.023
								52.362	267.252
								106.462	267.252
								283.212	267.252
								357.434	267.435
								116.614	267.572
								272.42	267.572
								350.117	267.572
								245.027	267.664
								379.339	267.892
								187.314	268.212
								124.434	268.395
								156.629	268.395
								18.704	268.532
								373.622	268.944
								220.332	269.036
								325.879	269.127
								415.42	269.127
								12.759	269.676
								36.2647	269.904
								401.884	269.996
								89.084	270.225
								97.4528	270.316
								198.335	270.728
								206.796	270.819
								307.358	270.956
								230.301	271.276
								163.9	271.368
								236.338	271.688
								366.214	271.688
								43.353	272.1
								426.122	272.1
								287.785	272.237
								178.442	272.511
								263.639	272.648
								112.453	272.968
								391.092	273.289
								142.864	273.38
								26.1124	273.7
								60.8222	273.792
								215.256	273.792
								72.4379	273.929
								297.526	274.112
								169.342	274.66
								47.0572	275.163
								104.45	275.392
								332.876	275.392
								357.434	275.484
								313.166	275.621
								150.272	275.941
								189.418	275.941
								349.385	276.124
								130.791	276.261
								322.266	276.352
								253.899	276.444
								384.232	276.535
								400.284	276.535
								121.919	276.673
								137.056	276.764
								411.442	276.856
								280.56	277.084
								80.8067	277.496
								304.294	277.816
								56.7979	278.045
								341.336	278.136
								93.5199	278.227
								198.015	278.227
								239.722	278.227
								419.353	278.456
								270.545	278.685
								39.3287	279.508
								182.238	279.645
								227.329	279.645
								158.504	279.965
								8.18585	280.148
								220.652	280.148
								17.7436	280.377
								69.191	280.377
								25.6551	280.468
								2.0579	280.56
								430.786	280.697
								209.768	280.788
								296.245	280.788
								189.875	281.109
								262.176	281.109
								369.689	281.429
								246.582	281.52
								391.092	281.749
								112.041	282.069
								163.717	282.16
								349.476	282.252
								288.425	282.389
								327.16	282.389
								379.888	282.389
								33.9324	282.572
								175.333	282.709
								407.189	282.892
								276.764	283.029
								77.1025	283.212
								100.105	283.669
								253.396	283.669
								88.3523	284.081
								147.62	284.172
								416.061	284.584
								316.779	284.721
								203.412	284.904
								60.7308	285.224
								359.766	285.956
								214.616	286.093
								238.99	286.093
								398.409	286.093
								48.7493	286.276
								335.711	286.825
								17.6064	286.916
								130.699	287.054
								0.45731	287.374
								119.77	287.465
								230.53	287.465
								292.541	287.465
								310.102	287.694
								157.269	287.968
								80.1665	288.105
								197.467	288.105
								303.105	288.608
								189.967	288.837
								343.257	288.837
								139.8	289.066
								147.62	289.066
								258.655	289.066
								93.7486	289.157
								41.4323	289.386
								386.839	289.386
								22.8198	289.569
								324.599	289.889
								11.387	289.98
								164.769	289.98
								221.612	289.98
								245.438	290.118
								28.6276	290.209
								366.443	290.3
								182.787	290.438
								283.121	290.529
								268.395	290.621
								105.913	290.941
								54.7858	291.169
								355.193	291.261
								69.6026	291.581
								422.006	291.81
								172.909	291.993
								117.574	292.45
								377.235	292.45
								392.784	292.77
								337.403	293.09
								407.921	293.09
								2.78959	293.182
								125.394	293.41
								157.36	294.005
								275.712	294.005
								428.682	294.325
								230.942	294.462
								312.114	294.462
								100.608	294.645
								237.481	294.874
								251.795	294.874
								363.15	295.102
								205.927	295.194
								20.2588	295.377
								289.066	295.377
								319.34	296.017
								181.918	296.794
								109.937	297.114
								213.975	297.114
								401.381	297.114
								133.626	297.206
								11.2956	297.297
								296.794	297.709
								344.949	297.709
								382.951	297.709
								416.381	297.709
								65.1667	297.846
								267.572	297.846
								370.878	297.846
								77.5598	297.938
								86.4316	297.938
								37.225	298.349
								140.44	298.486
								196.323	298.578
								279.096	298.578
								326.291	299.127
								29.0392	299.218
								118.169	299.401
								306.718	299.401
								150.501	299.63
								166.049	299.63
								189.326	299.63
								261.307	299.63
								92.8797	300.681
								129.922	301.413
								220.789	301.55
								53.8254	301.962
								243.929	302.053
								173.869	302.373
								157.269	302.694
								353.409	302.694
								411.122	302.831
								208.076	302.922
								111.629	303.242
								73.6269	303.334
								226.689	303.334
								294.462	303.562
								334.66	303.654
								17.6064	303.745
								63.6576	303.745
								274.34	303.883
								313.395	304.203
								393.515	304.203
								375.863	304.843
								191.018	305.026
								267.115	305.026
								102.209	305.117
								252.847	305.346
								424.338	305.437
								232.405	305.575
								41.2494	305.986
								364.933	306.078
								385.284	306.078
								3.65848	306.626
								309.05	307.038
								137.239	307.267
								341.428	307.358
								350.345	307.358
								201.491	307.45
								50.3498	307.907
								84.831	307.907
								401.793	307.907
								59.7704	308.09
								184.982	308.227
								259.523	308.318
								283.761	308.318
								325.971	308.318
								32.7434	308.41
								166.461	308.547
								144.144	308.959
								92.8797	309.142
								216.536	309.142
								242.557	309.142
								127.818	309.279
								118.809	309.599
								11.2956	309.782
								370.558	310.102
								427.814	310.102
								175.79	310.239
								300.27	310.331
								70.2428	310.422
								24.7405	310.651
								78.7945	310.651
								416.381	310.834
								98.8247	311.474
								157.132	311.703
								107.834	311.794
								281.109	312.114
								316.779	312.114
								268.715	312.251
								390.268	312.343
								291.901	312.526
								335.62	312.526
								250.835	312.754
								354.781	312.754
								195.271	312.983
								3.2469	314.126
								233.274	314.264
								409.293	314.264
								18.8869	314.858
								326.428	314.858
								133.352	314.995
								148.489	315.087
								206.567	315.407
								125.897	316.047
								168.153	316.047
								274.66	316.047
								346.733	316.138
								139.983	316.459
								215.164	316.687
								300.59	316.779
								35.3043	317.007
								52.865	317.007
								363.973	317.099
								44.3133	317.19
								70.5629	317.19
								379.979	317.19
								226.369	317.51
								422.326	317.51
								336.489	317.648
								259.706	318.059
								64.938	318.151
								184.25	318.151
								161.796	318.379
								85.4713	318.471
								114.693	318.699
								241.643	318.882
								25.0149	319.02
								295.102	319.02
								414.689	319.02
								309.279	319.111
								401.061	319.202
								79.3433	319.431
								177.345	319.98
								285.956	320.483
								198.976	320.712
								320.574	320.712
								248.274	320.803
								192.71	320.894
								10.6553	321.123
								93.1998	321.123
								389.948	321.443
								154.296	321.535
								374.491	321.992
								103.352	322.175
								67.1789	323.547
								266.2	323.547
								316.459	323.684
								234.966	324.096
								36.5848	324.279
								356.062	324.279
								50.7614	324.324
								209.219	324.324
								59.0387	324.416
								347.144	324.462
								127.818	324.507
								336.26	324.599
								146.659	324.644
								405.497	324.644

## Sheet: DN4
Red		Green		Blue		Violet		Double
X	Y	X	Y	X	Y	X	Y	X	Y
53.8254	0.45731	151.415	0.868889	7.13404	0.685965	347.281	0.548772	237.161	0.548772
89.9072	0.45731	172.497	0.45731	205.332	0.868889	397.037	1.3262	58.49	1.09754
120.959	0.731696	196.963	0.45731	402.296	0.868889	304.843	1.64632	64.5265	1.09754
169.113	0.45731	315.818	0.503041	243.426	1.87497	266.383	2.60667	364.842	1.55485
230.21	0.91462	368.958	0.685965	276.993	2.0579	231.902	4.61883	373.942	1.55485
331.504	0.731696	79.2518	1.55485	385.695	2.92678	61.8741	5.99076	390.589	1.96643
248.594	1.09754	105.593	1.73778	179.174	3.2469	9.37486	6.08222	125.394	2.0579
296.337	2.69813	341.336	1.73778	339.141	4.16152	111.538	6.08222	259.112	2.0579
158.001	3.01825	327.48	2.78959	18.1552	4.29871	371.519	6.631	29.8166	2.14936
369.598	3.01825	254.219	3.33836	222.893	4.39018	128.23	6.72246	36.2647	2.28655
71.2032	3.33836	42.0725	3.56702	82.8189	7.77427	317.19	7.13404	354.278	2.37801
313.943	3.33836	120.73	3.56702	98.7333	7.86573	424.018	8.32304	12.6675	2.60667
100.105	3.42983	405.588	3.65848	147.391	8.50597	193.442	8.96328	83.6877	2.69813
201.719	3.42983	285.362	3.9786	165.089	8.82608	92.3766	9.8779	319.751	2.69813
149.083	3.65848	53.8254	4.29871	124.846	9.05474	47.7889	10.7468	344.4	3.10971
379.75	3.9786	211.643	4.48164	54.5571	9.78644	149.723	11.2956	144.327	3.2469
137.65	4.48164	299.95	4.71029	411.625	9.78644	172.817	11.7071	184.25	3.2469
278.136	4.48164	350.986	4.93895	37.3165	10.4267	23.8716	12.3474	94.8918	3.65848
189.006	5.44199	133.626	5.25907	288.517	10.5181	216.628	13.8108	426.259	3.65848
357.205	5.57918	242.466	5.35053	361.366	10.5181	251.383	14.2223	163.488	3.8414
261.719	5.76211	309.279	5.35053	205.652	10.6553	338.272	14.9998	173.138	3.8414
418.85	6.40234	67.2703	5.76211	249.554	10.7468	355.65	18.7954	195.454	4.16152
405.908	6.95111	32.4233	5.85357	232.954	11.1584	405.405	18.7954	75.9592	4.48164
179.083	7.13404	422.737	6.08222	307.358	11.7986	75.0903	19.6186	206.567	5.12187
28.4447	7.45415	89.4956	6.72246	269.264	13.0791	386.656	19.6186	412.494	5.12187
430.969	7.45415	201.628	7.68281	193.671	13.7193	292.953	19.8473	104.13	5.35053
211.46	7.59135	269.036	7.68281	319.98	15.2742	126.035	21.8594	329.4	5.35053
16.4632	7.86573	159.693	7.86573	346.412	15.7315	308.73	22.1795	48.2005	5.44199
43.1243	8.50597	362.281	8.00293	394.156	16.4632	89.9072	22.8198	247.954	5.44199
78.9317	9.05474	172.497	8.64316	66.6301	16.8747	230.53	22.8198	226.597	5.67065
57.2095	9.55778	141.583	9.05474	138.931	17.6064	109.937	23.5515	154.296	5.76211
343.669	9.69497	277.633	9.1462	115.425	17.7436	60.5021	23.8716	2.60667	6.4938
329.904	10.3352	182.97	9.37486	376.686	18.4753	143.504	24.1917	22.1795	6.4938
243.746	10.6553	224.585	10.0151	53.5967	19.8473	274.249	24.1917	272.237	6.81392
108.245	10.7468	403.713	10.0151	179.586	20.396	431.243	24.7405	312.343	7.13404
394.476	11.0669	102.437	10.5181	220.652	20.4875	331.687	25.0149	398.18	7.13404
228.518	11.7986	390.268	10.7468	13.3992	21.5393	196.643	25.335	282.892	7.68281
121.919	12.1187	371.839	11.4785	421.045	22.0881	36.9964	26.8441	336.809	7.86573
385.147	12.9876	19.207	12.0273	334.797	22.1795	372.799	28.1246	293.822	8.00293
311.611	13.1705	411.853	12.4388	27.4843	23.0027	164.997	29.9081	384.552	8.18585
351.489	13.5821	7.59135	12.6675	80.8067	23.1399	16.3717	30.3197	303.745	8.32304
134.815	13.8108	74.9989	12.759	260.667	23.5515	184.89	30.8684	254.859	8.50597
3.2469	14.1309	259.935	12.8504	240.225	23.7801	352.266	31.9202	135.227	8.64316
292.13	14.451	238.35	13.0791	304.065	23.8716	262.587	32.3318	238.99	8.64316
162.437	15.0912	343.989	13.0791	154.799	26.2039	244.387	32.9721	265.103	8.82608
265.88	15.1827	381.259	13.4906	98.093	27.4843	216.536	33.3836	367.083	9.1462
90.5474	15.4114	317.739	13.8108	277.724	27.5758	392.464	33.7038	69.2825	9.37486
200.53	16.3717	304.203	14.2223	348.104	27.5758	285.956	35.3043	118.169	9.37486
403.073	16.3717	118.626	14.3595	363.241	28.216	154.937	36.2647	86.1115	9.46632
417.89	16.3717	357.113	14.9998	209.768	28.7191	72.5751	37.225	217.268	9.55778
147.94	16.4632	328.12	15.1827	319.431	29.0392	419.033	37.5452	355.193	9.55778
280.377	16.6918	57.118	15.8229	408.149	29.9995	239.63	37.7281	348.333	9.78644
43.2615	18.2467	45.8682	15.9144	296.017	30.2282	312.343	38.0482	375.635	9.78644
363.882	18.4753	210.18	16.2345	180.317	30.9599	86.8432	39.8774	199.387	10.4267
251.383	19.207	192.207	17.1949	197.055	31.5087	107.834	40.4719	406.457	10.4267
101.66	19.7558	84.831	17.2863	384.872	31.6001	403.073	41.2494	416.198	10.5181
301.322	20.0759	33.6123	17.4235	127.818	32.8806	119.907	41.661	31.8288	10.8382
19.1156	20.4875	430.146	17.8351	144.647	32.8806	40.3805	42.3012	321.855	10.9754
32.4233	20.9905	127.818	18.1552	44.4963	32.9721	339.553	42.6213	209.768	11.4785
65.8069	21.6308	166.461	18.4753	227.74	33.6123	180.317	43.4445	157.681	11.7071
428.042	21.6308	93.337	18.704	254.63	34.1611	226.369	43.6731	430.054	12.0273
188.503	22.0881	283.761	19.1156	65.4868	34.344	300.819	44.6335	186.765	12.1187
235.286	22.0881	398.729	19.1156	80.075	35.7159	203.823	45.2737	62.8344	12.2102
319.888	22.5911	274.981	19.2985	116.294	36.5848	137.97	46.7371	129.739	12.6675
328.44	22.4997	3.33836	19.7558	6.631	37.225	380.391	47.0572	12.1187	12.8504
377.875	22.7283	107.834	20.0759	334.339	38.4598	65.3496	48.9779	40.289	12.8504
174.189	23.0027	243.518	20.4875	29.9081	39.4201	158.641	50.1212	246.17	13.0791
270.407	24.8319	418.302	20.4875	417.433	40.4719	244.798	51.173	276.856	13.3077
343.897	24.8319	148.168	21.4478	100.608	40.7006	14.5425	52.2248	178.763	13.7193
210.088	25.2435	366.214	21.6308	166.461	40.7921	263.548	53.3224	397.86	13.9022
137.467	25.4722	263.639	21.8594	308.547	41.7524	282.252	53.5053	53.7339	14.451
394.476	25.7923	201.719	21.9509	367.586	42.9414	317.739	53.5967	361.229	14.6797
83.2762	26.9356	41.0207	22.7283	262.587	43.1243	353.501	56.3863	387.616	14.6797
359.126	27.027	254.859	22.9112	239.722	44.0847	415.969	56.3863	95.029	14.8626
286.093	27.2557	23.5515	23.0027	199.799	44.9536	429.323	56.7065	105.181	14.8626
220.561	27.3471	71.2032	23.2314	394.384	45.045	94.0687	56.8894	285.224	14.8626
122.193	27.4843	218.777	23.3228	279.645	45.2737	133.352	56.8894	80.6238	14.9998
247.359	28.1246	178.214	23.7801	350.254	45.4566	74.7702	57.0266	296.886	15.0912
71.9349	29.9081	348.104	24.2832	217.588	46.6456	29.6794	57.4381	256.963	15.1827
106.965	29.9081	134.266	25.1521	54.4656	47.6974	50.0297	57.9412	223.945	15.4114
55.2888	29.9995	387.936	25.1521	318.242	48.5206	395.528	59.1302	18.3839	15.5028
411.945	29.9995	322.175	25.5636	39.6488	48.8407	153.565	59.3131	231.125	15.7315
7.27123	30.3197	292.861	25.7923	150.181	49.1608	185.531	60.2735	308.41	16.0516
151.644	30.8684	403.988	25.8838	289.66	49.3895	111.081	60.7308	71.3861	16.3717
258.975	31.1885	160.973	26.2953	254.219	49.7096	225.728	60.7308	371.427	16.7833
40.6091	31.28	375.955	26.6154	188.503	49.8925	202.543	62.2856	269.584	17.0119
336.9	33.6123	227.42	27.8045	119.449	50.2126	365.894	63.3374	110.669	17.1949
162.665	33.7038	116.706	28.216	229.112	50.67	177.162	63.5661	122.651	17.2863
313.303	34.2525	58.8101	28.4447	84.5109	50.9901	297.526	64.1149	7.77427	17.515
303.883	34.4355	11.387	29.1764	103.992	50.9901	70.4715	64.2978	423.469	17.6064
20.7161	34.7556	302.922	29.1764	377.875	51.8132	331.184	65.5783	331.596	17.7436
91.5992	34.7556	49.7096	29.3593	408.561	51.8132	382.951	68.1392	185.622	18.2467
373.119	34.7556	95.6235	29.6794	2.69813	53.4138	315.315	68.2307	26.4325	18.3839
388.348	34.8928	356.702	30.1367	427.173	53.5053	252.207	68.4593	173.138	18.3839
424.978	34.9842	268.304	30.4569	136.827	53.7339	14.7711	69.191	412.357	18.3839
324.827	35.533	426.762	30.4569	333.196	54.3742	428.682	69.9227	325.559	18.4753
196.826	35.7159	82.6359	30.5483	67.1789	55.1973	269.904	70.7459	152.924	18.5668
274.752	35.8531	147.528	30.5483	306.398	55.929	350.757	70.7459	196.826	18.5668
292.221	36.036	67.8191	30.9599	22.7283	56.7979	147.94	71.2946	314.035	18.704
186.903	37.3165	333.425	31.0514	214.204	56.7979	406.64	72.758	214.616	18.7954
354.461	37.408	249.874	31.5087	365.894	56.8894	35.3958	73.0782	380.848	18.7954
174.83	37.7281	313.166	31.5087	392.692	57.2095	219.189	74.0385	47.2859	19.2985
119.358	38.7799	415.558	31.5087	349.293	60.2735	99.6479	74.7702	207.436	19.4357
234.509	39.1	124.205	31.6916	275.072	60.4107	287.236	75.0903	343.028	19.4357
400.512	39.4201	238.213	32.2404	167.65	60.5021	80.8067	75.319	350.986	19.5271
207.527	39.6488	31.0514	32.5605	200.348	60.7308	118.718	75.7306	61.0052	19.9387
412.174	39.9689	191.979	32.8806	10.6553	61.3253	166.232	76.0507	161.613	19.9387
251.795	41.1122	203.503	32.9721	242.374	62.1027	230.21	77.6513	37.5452	20.2588
343.989	41.2494	176.613	33.8409	42.0725	63.9777	202.131	78.383	96.401	20.396
64.435	41.4323	278.548	34.344	153.976	64.2063	332.785	79.572	392.372	20.396
128.779	41.7524	135.318	34.8928	84.5109	65.2582	46.0054	79.8921	85.8828	20.7161
48.109	41.9811	399.872	35.7159	290.849	65.2582	250.926	81.4469	142.315	20.8991
380.299	43.4445	99.1448	36.2647	56.7065	65.9898	388.759	83.6877	131.934	21.3107
221.384	43.6731	160.653	36.4476	101.34	65.9898	367.906	84.6481	361.458	21.3107
83.8707	43.856	345.132	36.4476	126.858	66.4472	10.7468	86.02	246.399	21.8594
30.5483	44.0847	222.893	36.7677	319.111	66.7215	272.008	86.4316	279.645	21.9509
430.054	44.4048	369.186	37.7281	258.472	67.6819	429.186	86.8432	402.021	21.9509
159.601	44.7249	379.156	37.7281	112.453	68.7337	304.294	87.0718	287.694	22.4082
361.687	44.8164	254.539	37.8653	420.085	68.7337	127.315	87.7121	415.649	23.5515
96.4924	45.045	112.361	38.1397	401.473	69.2825	190.378	87.7121	182.787	23.6429
328.211	45.3652	408.652	38.4598	184.25	69.9227	61.7826	90.1358	165.729	23.8716
110.029	45.5938	296.657	38.7799	222.481	70.7459	352.037	90.3645	118.169	24.1002
17.0119	45.6853	38.2769	38.9171	7.04258	70.8831	109.937	90.4559	298.166	24.1002
289.249	45.7767	211.963	38.9171	211.643	70.8831	285.544	91.0047	370.878	24.2832
261.216	46.0054	21.768	39.1	168.565	73.2153	257.831	91.3248	408.469	24.2832
145.836	46.6456	388.348	39.2372	141.034	73.3983	151.735	91.4163	102.62	24.4204
313.166	46.8286	360.086	39.7402	326.108	73.3983	90.4559	91.7364	7.27123	24.5118
418.622	47.3773	56.3863	39.8774	27.027	73.5355	38.7799	92.3766	264.508	24.8319
270.225	47.4688	331.275	39.8774	338.272	74.3586	405.085	92.3766	214.616	25.335
391.092	47.4688	12.4388	40.0604	386.656	74.4501	235.926	92.6968	338.044	25.335
173.046	49.0694	177.802	41.0207	243.655	75.6391	173.138	93.4285	14.0394	25.4722
298.349	49.5724	230.073	41.0207	194.494	75.9592	214.433	93.84	53.5053	25.4722
6.17369	49.8011	84.7396	41.2494	72.0263	76.3708	333.608	94.0687	44.8164	25.7923
370.467	50.0297	147.848	42.0725	309.919	76.7824	19.7558	96.401	65.9898	25.7923
405.268	50.67	247.039	42.0725	368.775	77.011	185.394	97.9558	149.723	26.1124
193.259	51.5846	191.75	42.6213	357.845	77.7427	377.875	99.1448	74.5873	26.4325
76.6909	51.7218	311.931	42.6213	263.959	80.4866	77.1025	99.5564	190.287	26.4325
206.887	52.6821	422.737	42.8042	91.0962	80.8067	203.183	101.157	32.6519	26.524
237.161	52.6821	74.9989	43.4445	297.389	80.9439	418.073	101.66	126.035	26.8441
225.637	53.0022	267.984	43.4445	153.885	82.0872	303.425	102.3	240.225	26.8441
43.4445	53.1852	284.813	43.4445	52.2248	82.1786	163.168	103.261	314.767	26.8441
117.666	53.1852	321.032	43.7646	282.801	83.3676	139.663	104.13	233.045	27.027
342.388	54.5571	0.503041	44.0847	0.45731	83.5963	244.249	104.45	382.311	27.027
146.339	55.1059	50.3498	45.6853	34.4355	83.8707	3.56702	104.861	353.318	27.1642
59.8619	55.426	133.123	45.7767	127.91	83.8707	100.745	105.501	305.758	27.3471
157.269	55.426	63.0173	46.1883	342.617	84.328	431.243	106.736	201.948	27.6673
129.602	56.1577	370.787	46.3255	403.805	84.6481	120.318	108.474	23.2314	27.8959
276.856	56.1577	119.907	46.8286	217.359	84.831	319.34	109.297	174.098	28.7191
314.675	57.118	257.191	47.4688	424.247	85.3798	341.885	109.297	252.618	28.7191
383.272	57.5296	337.129	47.7889	21.2192	86.203	58.49	109.937	273.151	28.7191
327.708	57.6211	156.217	47.8804	178.625	86.203	278.685	110.349	324.187	28.8563
87.1633	57.7583	94.7089	49.0694	234.417	86.203	40.4719	110.669	397.86	29.2678
252.755	57.8497	386.656	49.0694	77.7427	88.2151	363.699	111.538	290.209	29.4965
104.633	59.3131	349.796	49.298	163.9	89.7242	222.481	111.629	89.9072	29.9995
356.885	59.7704	411.533	49.298	378.607	90.0444	23.5515	112.041	112.178	29.9995
6.08222	60.2735	107.514	49.481	201.399	90.7761	190.058	113.321	131.111	30.4569
19.8473	61.0052	34.8928	49.7096	325.696	90.7761	85.6085	114.282	377.555	30.5483
289.157	61.1424	208.396	49.8011	308.09	92.5596	253.807	114.282	60.4107	30.7312
265.011	61.9655	359.857	49.8925	245.667	93.5199	400.284	114.922	430.603	30.7312
422.555	62.1027	235.789	50.0297	362.601	94.5717	378.287	116.202	222.253	30.8684
411.625	62.2856	10.6553	50.1212	103.352	94.7089	145.059	116.706	77.8799	30.9599
30.7312	63.246	169.845	50.4413	139.068	94.8004	413.637	118.718	389.171	30.9599
182.558	63.4746	197.787	51.4931	51.3102	95.4406	309.37	118.809	139.891	31.0514
46.417	63.7948	185.211	51.5846	278.776	97.8644	172.406	119.449	156.492	31.28
430.603	63.7948	217.68	51.7218	12.5303	98.093	206.064	119.907	280.88	31.28
66.127	64.2978	420.954	51.8132	119.678	99.2363	291.261	120.501	343.348	31.6916
217.177	64.2978	400.604	52.5449	255.27	99.5564	73.947	122.742	366.626	32.1489
395.024	64.7551	127.086	52.6821	229.112	99.6479	110.669	123.154	308.41	32.4233
123.291	65.8984	270.225	52.7736	408.652	100.105	262.679	124.205	360.909	33.0635
150.592	65.8984	306.306	53.0022	67.8191	100.517	226.048	124.343	96.2638	33.2007
228.518	65.8984	24.8319	53.3224	389.308	100.837	398.591	124.983	11.1584	33.2922
377.327	65.8984	142.452	53.5967	349.385	101.889	357.525	125.303	419.765	33.2922
239.173	66.2185	86.9804	53.9169	152.467	102.3	8.64316	126.035	233.594	33.5208
342.845	66.9502	294.645	53.9169	423.469	102.758	426.259	126.218	209.86	33.7038
304.843	67.6819	324.279	54.8772	40.289	102.941	33.7038	126.858	118.809	33.8409
159.693	67.9106	56.7065	55.1059	23.8716	103.489	186.674	126.858	167.193	34.0239
248.274	67.9106	103.901	55.6089	175.79	103.901	334.98	126.995	297.846	34.0239
192.71	68.002	113.23	55.8376	196.003	104.45	244.798	127.498	1.3262	34.1611
362.418	68.6422	71.066	57.4381	89.4956	104.633	93.6114	127.635	331.916	34.2525
139.068	69.2825	256.139	57.6211	312.251	104.633	128.047	127.91	51.4931	34.344
81.0354	69.3739	284.401	57.7583	332.236	105.913	276.261	129.51	149.632	34.344
91.9193	70.0142	339.233	57.9412	214.524	106.325	179.997	129.739	34.8928	34.5726
107.925	70.3343	40.6091	58.0784	375.863	106.325	52.4535	130.15	320.391	34.7556
329.172	70.4715	236.521	58.0784	78.0628	107.376	162.985	130.791	404.537	34.7556
172.726	70.7459	159.052	58.1698	293.182	107.376	142.864	131.751	106.965	34.9842
280.377	70.9745	311.474	58.1698	242.146	109.937	385.147	132.163	258.334	35.2129
55.1973	71.2032	3.33836	58.8101	214.296	111.629	316.047	133.626	25.9752	35.3043
205.652	72.5751	425.39	59.2217	268.075	111.858	293.822	135.455	412.814	35.533
313.395	73.0782	388.576	59.9534	46.417	112.178	250.926	136.919	42.3926	35.7159
402.113	73.7184	124.434	60.2735	131.431	112.27	234.097	137.33	86.3401	35.9446
294.553	74.9989	248.182	60.2735	108.474	112.91	196.003	137.788	180.455	36.1732
345.589	76.0507	368.226	60.4107	419.902	113.733	412.036	137.879	383.043	36.2647
260.895	76.2793	406.32	60.7308	163.397	114.053	80.1665	138.199	226.186	37.0878
270.225	76.6909	174.601	61.3253	97.3156	115.882	365.894	138.428	125.394	37.3165
376.824	76.9196	223.305	61.7826	300.59	115.974	214.844	138.748	266.52	37.408
68.7337	77.2397	84.0993	61.8741	353.089	116.202	24.8319	139.068	67.5904	37.5452
426.442	77.4226	378.195	62.1942	401.884	116.202	112.361	141.583	348.745	37.5452
395.116	77.7427	59.1302	62.7429	386.107	116.385	347.693	141.675	248.091	37.6366
240.134	78.0628	196.506	62.7429	3.01825	116.934	312.343	142.635	281.2	38.2769
414.826	78.4744	144.144	63.0173	64.2978	117.254	43.7646	143.687	192.39	38.4598
190.927	78.9317	207.939	63.246	222.893	117.574	95.8522	144.236	338.592	38.6884
115.425	79.1146	321.763	63.7948	203.183	117.986	127.498	144.236	78.4744	39.1
128.87	79.3433	358.257	63.7948	182.97	118.398	174.921	144.876	161.796	39.2372
38.3683	79.9835	15.7315	63.9777	34.7556	118.718	63.5661	145.516	303.242	39.2372
20.4875	80.7152	269.996	63.9777	16.143	119.266	395.756	147.62	95.4406	39.4201
224.997	81.1268	131.339	64.435	323.684	119.998	326.199	148.031	134.403	39.5573
172.406	81.264	27.8045	65.3496	368.546	119.998	268.807	148.763	115.242	39.6488
145.836	81.3555	347.784	65.8069	135.638	120.501	293.41	148.763	288.929	39.6488
213.792	81.3555	165.501	65.8984	84.5109	121.69	141.675	148.9	374.491	39.8774
9.78644	81.9042	213.975	66.4472	147.528	122.742	235.057	151.095	323.044	40.1518
319.02	81.9042	295.102	67.1789	284.401	122.833	86.9804	152.787	311.062	40.289
158.504	82.8189	36.4476	67.2703	115.745	123.154	359.995	154.388	363.699	40.289
305.117	82.9561	184.342	67.3618	341.108	124.754	411.853	155.257	16.3717	40.3805
363.973	82.9561	413.957	67.3618	259.386	125.303	189.738	155.577	141.903	40.6091
351.717	83.0475	94.3888	67.499	53.3224	126.995	212.1	156.217	60.182	40.7006
87.0718	84.0079	279.645	68.3221	307.45	128.047	10.0151	156.72	5.44199	40.9293
332.647	84.831	74.9989	68.4593	235.926	128.23	279.508	158.184	25.6551	41.1122
383.043	85.0597	149.403	68.7337	198.747	128.87	110.486	158.321	153.016	41.1122
240.134	85.2883	398.409	68.7337	414.277	129.19	29.0392	159.464	216.125	41.1122
255.819	85.2883	227.329	69.8313	174.738	129.922	379.247	160.013	257.511	41.3408
98.093	85.6085	117.986	70.2428	376.366	130.471	132.071	160.196	186.262	41.7524
53.0022	86.3401	104.221	70.7459	388.988	130.471	254.219	160.333	273.929	42.164
292.13	87.0718	262.039	71.2032	212.603	131.431	167.33	160.973	415.329	42.7128
74.4501	88.2151	3.33836	71.3861	104.45	132.163	346.55	163.808	315.956	43.0329
136.095	88.7639	46.0969	71.3861	18.2467	132.574	330.772	164.037	355.97	43.353
268.212	88.8554	197.146	71.5233	291.169	132.574	207.207	164.357	70.5629	43.5817
205.332	89.3127	160.745	71.6148	352.449	132.803	58.8101	164.677	332.144	43.6731
116.202	89.8157	245.118	71.6148	64.2978	133.443	312.983	165.638	171.034	43.7646
410.985	90.1358	333.699	72.255	325.559	134.815	236.109	167.01	209.631	43.9932
224.997	90.2273	362.007	72.5751	84.1908	135.135	396.899	167.101	385.375	44.1762
281.749	90.4559	64.938	73.0782	34.1611	135.455	421.686	167.741	35.8531	44.6335
341.016	90.7761	304.706	73.5355	120.501	136.278	19.0241	168.793	400.284	44.6335
43.2615	91.5992	382.631	73.8556	264.691	136.507	79.7549	168.793	233.914	44.9536
6.81392	92.2394	88.6724	74.3586	160.516	136.827	96.8125	168.885	11.5699	45.7767
178.854	92.5596	391.96	75.0903	425.481	137.056	119.678	169.113	294.553	45.7767
26.4325	92.8797	177.802	75.2275	401.884	138.199	45.7767	170.165	101.157	45.8682
373.531	92.8797	214.844	75.4104	245.347	138.291	215.576	170.165	250.286	45.9597
398.088	93.1998	373.211	75.4104	137.239	138.519	264.371	171.217	163.9	46.1883
190.79	93.5199	128.55	75.9592	279.508	139.342	363.882	171.354	46.3255	46.3255
160.424	95.3034	235.926	76.3708	184.342	140.852	301.642	171.857	345.589	46.417
328.76	95.9437	25.9752	76.7824	150.272	142.315	149.403	173.046	408.012	46.417
56.0662	96.4924	419.765	76.7824	208.899	142.315	189.418	173.138	424.338	46.417
95.1205	96.4924	56.4778	77.8799	49.298	142.452	279.828	173.366	87.4834	46.9657
239.31	96.5839	401.564	77.8799	337.541	142.772	169.205	177.802	193.899	47.1487
296.474	96.5839	16.5546	78.1543	304.294	142.955	238.533	178.122	306.215	47.1487
426.442	96.5839	74.4501	78.6116	92.6968	143.687	337.632	179.174	79.4348	47.3773
385.055	97.1327	186.903	79.3433	362.007	144.236	381.762	179.266	124.846	47.4688
148.763	97.3156	328.943	79.3433	225.317	144.967	317.831	179.814	374.354	47.4688
358.074	97.3156	252.527	79.7549	4.61883	145.059	105.364	180.317	241.185	47.606
81.0354	97.6357	286.185	79.7549	382.22	146.888	59.1302	181.506	222.344	47.7889
251.246	98.2759	111.858	80.3951	171.766	149.083	406.229	182.147	282.572	48.2005
315.178	98.5961	276.352	80.3951	106.553	149.952	422.737	182.147	114.19	48.3377
265.24	98.8247	2.14936	80.7152	415.558	150.043	260.987	184.799	213.472	48.3377
413.454	98.9162	42.4841	80.7152	76.1879	150.181	132.711	185.302	264.371	48.3377
283.349	99.6021	344.949	80.7152	287.785	150.912	72.6666	186.765	1.09754	48.6578
211.232	100.288	139.159	81.1268	120.09	151.415	294.553	186.765	28.6276	49.1608
198.656	100.745	300.59	81.9957	203.091	152.467	26.1124	187.406	144.556	49.298
339.644	101.569	208.488	82.0872	60.0905	152.787	359.354	187.406	323.364	49.298
129.007	101.889	97.0412	82.3158	18.7954	153.016	151.644	187.634	132.254	49.8011
224.173	102.117	150.272	82.3158	35.3043	153.245	222.801	188.046	203.412	49.8011
400.924	102.529	162.437	83.3676	316.55	153.428	201.948	188.366	71.7062	50.2126
30.8684	103.489	264.371	84.4194	226.689	153.656	11.2956	189.326	179.357	50.2126
274.249	103.489	83.5963	84.5109	348.653	153.748	275.712	190.515	58.0784	50.4413
111.95	104.221	316.55	84.5109	400.924	154.068	93.7486	191.339	393.195	50.4413
19.8473	104.633	223.716	84.6481	263.959	154.479	45.7767	193.259	429.323	50.5328
368.958	104.953	379.75	84.9682	179.997	155.028	430.969	193.259	355.01	50.67
49.1608	105.364	416.198	85.2883	247.679	155.028	181.689	193.899	19.4357	50.7614
171.537	105.364	120.821	85.3798	155.257	155.668	370.97	193.991	338.181	50.8529
65.1667	106.004	171.034	85.4713	132.803	156.4	389.72	193.991	273.7	50.9901
255.819	106.553	246.49	85.7914	332.556	157.04	340.056	195.271	91.4163	51.0815
154.799	106.873	361.687	85.8828	304.386	158.412	241.323	195.363	414.917	51.5846
299.127	107.056	197.055	86.203	368.546	158.412	403.713	195.363	255.819	51.8132
427.082	107.056	396.579	86.5231	97.1327	159.144	113.321	197.787	51.4931	52.2248
385.375	107.376	58.49	86.9804	144.967	159.601	57.9412	199.387	100.517	52.6821
184.662	107.697	353.409	86.9804	50.1212	160.196	159.601	199.387	188.275	52.6821
232.222	108.337	69.3739	87.4834	2.78959	162.116	133.443	199.616	327.983	52.7736
352.357	108.565	25.7923	88.0322	389.4	162.116	25.5636	199.707	385.787	53.0022
95.5321	109.846	327.068	88.3523	426.67	162.757	207.527	200.348	108.154	53.0937
206.247	109.846	294.782	88.7639	407.509	163.717	323.547	200.348	151.873	53.0937
326.611	109.846	15.0912	88.9925	277.724	165.18	305.986	201.399	313.074	53.3224
409.613	109.846	236.429	88.9925	194.723	165.501	259.706	202.36	362.281	53.5967
2.60667	110.029	277.724	88.9925	71.2946	165.638	288.517	203.732	300.361	54.0541
80.3037	113.093	408.012	89.1755	161.156	166.461	418.942	204.372	34.7556	54.1455
264.371	113.413	181.506	89.3127	215.805	166.552	222.801	204.783	172.406	54.1455
374.811	113.87	214.296	89.7242	339.644	166.552	387.159	206.155	369.918	54.237
139.983	114.053	102.117	89.8157	240.865	168.565	72.5751	206.567	242.237	54.7858
285.224	114.19	372.159	89.8157	32.1489	168.885	212.192	206.704	290.621	54.8772
172.589	114.373	140.852	91.7364	319.523	169.113	147.528	207.665	347.601	55.0144
311.703	114.693	337.541	91.9193	293.41	169.205	355.01	208.396	229.753	55.2888
344.537	115.105	157.269	92.148	177.345	170.897	174.51	209.539	6.4938	55.426
391.412	115.242	430.969	92.148	92.148	171.217	335.208	209.539	123.474	55.5174
119.998	115.882	48.4291	92.8797	110.257	171.766	47.606	210.728	409.11	55.5174
210.82	116.614	127.818	93.1998	377.647	172.086	11.1584	211.872	164.037	55.8376
333.608	117.026	386.244	93.1998	9.05474	172.406	100.517	212.832	401.061	55.929
60.9137	117.254	417.25	93.6114	357.434	172.589	307.77	212.832	218.869	56.1577
296.337	117.666	249.371	93.9315	128.23	172.909	198.335	214.844	17.0119	56.2491
198.747	117.986	32.9721	94.0687	415.878	174.921	276.764	215.164	204.372	56.3863
160.104	118.626	269.264	94.4803	229.021	175.881	85.3798	215.256	79.9835	56.4778
251.383	118.809	110.669	95.029	256.78	175.973	115.882	215.576	270.956	56.5693
29.1764	119.129	6.08222	95.3034	400.924	176.75	239.31	215.667	421.274	56.7065
227.1	119.358	84.5109	95.9437	59.5418	177.985	371.839	216.765	45.2737	56.8894
43.856	119.449	230.53	95.9437	75.0903	178.122	402.296	217.588	117.026	57.2095
76.3708	119.587	315.315	96.0809	148.489	178.534	133.626	218.457	376.915	57.2095
238.853	119.77	396.488	96.5839	40.1518	179.174	25.7923	219.6	196.643	57.4381
105.273	120.09	197.146	96.904	270.545	181.049	184.022	219.692	319.843	58.2613
361.778	120.09	292.13	97.7729	207.756	181.186	159.373	219.92	333.425	58.49
403.805	120.501	259.935	97.8644	299.721	181.278	259.386	220.789	179.906	58.5814
277.084	120.821	73.6269	97.9558	387.616	181.506	333.196	221.384	139.571	58.8101
180.226	121.919	303.105	97.9558	21.1277	181.598	220.652	223.533	64.2063	59.2217
95.3034	123.154	354.873	98.1845	193.899	182.65	71.066	224.036	148.351	59.3131
5.35053	123.382	207.756	99.0534	330.315	182.878	292.45	224.676	260.987	59.5418
17.9266	123.382	346.092	99.1448	161.705	183.381	35.9446	227.329	128.55	59.7704
380.528	124.343	142.772	99.2363	49.7096	185.394	353.181	227.969	279.828	60.0905
142.635	125.303	174.738	99.3278	177.253	185.622	314.995	228.198	25.335	60.4107
319.34	125.303	326.84	99.3278	365.894	185.622	422.417	229.25	54.7858	60.7308
331.413	125.486	163.397	99.5564	287.785	185.714	4.61883	230.301	304.614	60.7308
125.074	125.715	94.1601	100.105	314.995	186.034	273.609	230.53	37.408	60.8222
345.681	125.806	425.481	100.288	141.812	186.674	383.912	230.804	90.0444	61.1424
301.093	126.675	46.9657	100.425	96.4924	186.994	202.543	232.954	294.142	61.1424
431.335	126.766	22.5911	100.745	114.282	187.223	156.217	233.137	391.092	61.5539
168.061	127.315	368.775	101.477	348.425	188.046	126.446	233.274	97.3156	61.6454
267.755	127.635	58.0784	101.66	242.466	188.183	403.805	233.274	341.428	61.7826
370.01	128.367	240.454	101.797	401.793	188.595	238.121	233.685	212.192	62.1027
219.28	128.87	405.588	101.98	213.244	190.698	94.1601	234.006	371.93	62.7429
65.0295	129.51	188.686	102.529	379.156	192.802	110.166	234.234	351.946	62.9259
83.6877	130.699	105.501	103.169	124.434	193.031	51.7218	235.057	382.403	63.0173
109.526	131.111	377.967	103.169	66.6301	193.259	364.43	235.057	400.192	63.0173
287.145	131.339	220.241	103.489	416.838	193.351	186.171	235.926	160.196	63.1545
195.912	131.934	124.205	103.581	77.2397	193.991	71.8434	237.938	233.914	63.1545
394.567	132.071	12.0273	103.672	8.73462	194.311	250.194	238.99	361.549	63.3374
23.0027	132.254	284.493	104.312	265.972	194.311	21.9509	239.951	416.061	63.6576
240.865	132.254	388.851	105.501	252.435	195.134	221.064	240.225	135.547	63.7948
206.704	133.214	357.525	106.004	19.7558	195.271	173.778	240.682	252.298	63.7948
254.31	133.763	262.908	106.233	39.5573	196.506	348.242	241.185	313.303	63.8862
42.6213	133.946	341.336	106.325	297.297	197.146	326.748	242.054	326.108	63.8862
94.5717	133.946	29.8166	107.285	328.44	197.787	299.401	242.877	79.3433	64.1149
308.639	134.175	151.873	107.285	193.259	198.518	385.695	243.198	189.098	64.2063
405.177	134.266	161.476	107.605	231.353	198.656	82.9561	243.929	168.473	64.2978
150.043	134.495	329.675	107.925	149.22	199.159	416.61	244.89	245.667	64.2978
275.392	134.906	273.06	108.017	101.66	199.296	11.1584	247.542	62.1027	64.938
229.57	135.135	416.381	108.154	173.458	199.799	282.389	247.679	426.259	65.0295
13.1705	135.455	112.59	108.245	360.589	201.399	196.095	250.103	274.843	65.1667
342.068	136.095	68.6422	108.474	394.796	203	128.87	250.514	107.514	65.2582
355.421	136.187	91.4163	108.886	345.452	203.091	313.486	250.926	8.82608	65.3496
329.812	136.507	195.363	109.068	311.611	203.732	215.073	251.246	223.625	65.4868
183.93	137.467	179.906	109.709	377.555	203.732	158.184	251.886	117.895	65.5783
131.111	137.559	254.219	109.846	276.993	203.823	60.9137	252.618	283.029	65.9898
166.461	138.291	228.929	110.257	431.335	204.555	335.528	252.618	407.6	66.4472
430.283	138.839	292.13	110.761	243.426	205.104	263.868	252.938	20.1674	66.9502
388.119	140.623	309.279	111.218	67.2703	205.835	233.594	253.258	265.011	66.9502
55.426	141.034	405.908	111.721	84.831	207.527	369.827	253.396	206.384	67.0417
118.946	141.034	137.239	112.59	50.67	208.076	393.332	253.807	47.6974	67.1789
259.523	141.263	203.503	112.773	214.113	208.488	35.9446	254.859	145.196	67.1789
73.0782	141.355	36.7677	112.91	108.748	208.899	177.985	255.682	197.695	68.1392
294.782	141.355	385.055	112.91	138.428	209.128	425.71	255.682	32.0117	68.3221
139.891	141.675	169.342	113.23	407.738	209.631	296.566	257.603	178.625	68.6422
374.491	141.675	5.03041	113.642	20.4875	209.951	99.3278	258.152	154.296	68.7337
318.242	142.315	424.109	113.87	121.37	212.512	350.574	258.243	389.948	68.7337
419.902	143.047	56.8894	114.602	258.334	212.603	142.864	259.706	217.177	68.9624
243.746	143.275	18.8869	114.785	228.061	213.381	117.574	259.844	336.672	68.9624
100.837	143.687	77.8799	114.785	297.206	213.564	79.9835	262.039	99.3278	69.6026
405.726	144.556	370.878	115.334	195.363	213.655	14.0394	262.587	321.352	69.6026
269.356	144.647	244.569	116.065	325.788	215.256	238.35	264.828	39.7402	69.6941
208.808	144.967	357.434	116.065	151.232	215.667	277.724	265.103	357.662	69.8313
220.972	145.196	103.261	116.477	39.4201	216.125	316.276	265.972	288.517	69.9227
199.296	145.379	47.6974	116.706	345.452	216.765	196.003	266.795	307.587	69.9227
85.3798	145.516	261.307	116.934	382.631	216.856	409.704	267.664	376.686	69.9227
155.12	145.699	117.026	117.346	0.685965	217.268	39.7402	268.395	86.203	70.3343
34.8928	146.156	187.954	117.574	175.881	217.497	257.603	268.395	368.318	70.5629
338.272	147.528	342.617	117.757	287.465	217.68	381.671	269.036	68.5508	70.7459
284.493	148.031	234.737	117.986	423.286	217.817	217.588	269.356	239.722	70.7459
10.1066	148.351	315.818	117.986	59.3131	218.32	331.916	270.956	423.698	70.8831
365.482	149.22	394.796	117.986	361.229	218.96	62.4228	271.048	165.18	70.9745
378.287	149.403	284.813	118.306	392.052	222.024	158.092	272.648	346.641	70.9745
391	149.54	273.7	118.489	76.0507	222.573	100.837	272.831	77.3311	71.066
182.558	149.632	151.964	118.626	269.584	222.893	348.104	272.831	123.702	71.2032
22.1795	149.952	89.3127	118.946	93.84	222.984	180.958	273.38	130.471	71.6148
354.049	149.952	329.4	119.358	209.219	223.076	302.191	274.432	200.53	72.5751
231.033	150.272	128.047	119.678	243.426	223.305	128.687	275.392	230.621	72.5751
304.934	150.501	218.137	119.678	305.026	224.997	80.075	277.313	298.029	72.5751
256.78	151.004	303.654	119.998	12.3474	225.317	22.8198	279.005	395.985	72.9867
48.5206	151.964	408.469	120.501	410.802	225.408	362.51	279.508	190.195	73.0782
424.338	152.284	378.058	120.959	25.335	225.957	397.768	279.737	183.61	73.947
168.702	152.467	70.5629	121.279	195.271	226.186	113.642	280.057	257.1	73.947
405.588	153.107	422.097	122.33	179.906	227.329	3.01825	280.148	52.4535	74.0385
149.312	153.336	25.2435	122.651	161.934	228.061	232.817	280.56	414.826	74.0385
322.495	153.428	196.963	122.833	47.8804	228.381	209.539	281.657	11.4785	74.1757
72.5751	154.388	34.1611	123.154	122.651	228.381	321.855	282.069	92.6968	74.1757
97.9558	154.799	61.7826	123.794	110.486	228.929	155.577	283.669	106.965	74.1757
275.484	155.257	137.97	123.794	257.831	229.341	251.566	283.761	113.23	74.1757
121.37	155.348	169.205	123.885	323.684	229.57	418.85	283.761	224.036	74.1757
58.9015	156.217	349.614	124.205	140.623	230.621	282.16	284.264	247.359	74.3586
339.233	156.217	295.285	124.343	372.799	230.804	186.994	284.584	330.315	74.3586
218.137	157.269	120.501	124.663	284.721	231.993	378.698	285.041	265.011	74.4501
136.599	157.452	179.997	125.074	342.388	232.085	267.023	285.133	135.135	74.6787
242.694	157.452	248.822	125.486	228.198	232.222	47.606	286.505	20.579	75.0903
350.848	159.144	311.382	125.806	62.2856	233.685	305.666	289.249	152.284	75.0903
419.582	159.281	45.4566	126.126	212.283	234.097	135.227	290.118	43.856	75.2275
373.531	159.601	387.616	126.446	357.342	235.149	64.2063	291.489	4.29871	75.4104
196.735	159.921	14.3595	126.675	297.938	236.109	344.217	291.993	275.163	75.6391
291.901	160.424	158.732	127.178	82.3158	236.429	358.806	295.102	173.046	75.8677
207.207	160.653	100.288	127.727	392.692	236.841	99.1448	295.285	209.768	76.3708
40.3805	161.065	366.122	127.91	406.229	240.865	120.638	295.377	31.9202	76.4622
302.694	161.156	397.22	128.138	39.3287	241.002	225.408	295.605	61.4625	77.3311
314.767	161.293	87.7121	128.367	312.343	241.323	170.074	296.474	157.589	77.3311
107.697	161.476	214.524	128.458	423.378	241.323	395.985	296.566	322.404	77.3311
230.301	161.705	273.289	128.458	12.0273	241.505	149.723	297.938	280.697	77.6513
10.9754	161.934	284.721	128.55	93.5199	241.826	322.907	298.486	314.355	77.6513
23.8716	162.848	328.12	128.687	129.739	242.374	289.477	299.538	142.132	78.0628
66.4472	163.397	78.6116	128.87	271.688	242.374	196.323	300.819	406.457	78.0628
364.933	163.626	203.503	129.327	186.262	242.786	416.518	300.91	304.523	78.1543
173.641	164.037	231.582	130.059	163.626	242.877	254.539	301.55	339.644	78.383
401.381	164.129	431.381	130.882	377.647	242.877	271.779	301.87	361.229	78.4744
283.852	164.357	257.191	131.614	110.166	244.798	21.8594	302.511	292.313	78.6116
386.336	164.357	408.469	131.614	207.207	245.21	380.391	303.014	388.759	79.2518
156.72	164.769	421.686	131.843	238.99	245.53	44.8164	303.654	348.562	79.4348
84.9682	165.409	347.784	132.574	225.865	246.582	237.801	305.666	124.205	79.572
252.435	166.369	112.041	132.894	327.8	246.902	8.00293	306.398	380.07	79.7549
426.762	166.781	337.541	133.123	145.928	247.222	211.369	307.267	84.1908	79.8921
3.65848	167.101	379.659	133.214	50.9901	247.542	336.489	307.267	430.054	80.4866
264.92	167.101	299.538	133.763	249.783	248.274	107.376	307.678	236.338	80.7152
323.547	167.101	59.8619	134.815	296.566	248.502	308.318	307.998	371.93	80.7152
183.839	167.33	184.022	134.906	68.9624	248.914	86.4316	308.822	258.655	80.8067
49.5724	167.65	224.036	134.906	119.358	250.743	71.2032	310.102	72.1635	80.9439
141.812	167.65	312.983	135.135	366.214	251.246	123.611	310.834	177.482	81.3555
355.193	169.205	1.00608	135.638	170.897	251.475	388.256	310.834	195.363	81.3555
125.623	169.525	139.48	135.638	24.5118	252.207	178.442	311.382	218	81.4469
101.66	170.577	195.134	135.775	345.452	252.755	418.53	312.023	166.141	81.5841
410.985	170.805	24.1917	135.867	388.119	253.396	369.827	313.166	398.912	81.6756
275.072	171.537	126.675	135.867	420.954	253.899	352.769	314.767	269.584	81.767
391.64	171.857	163.9	135.867	89.9072	254.767	141.355	315.178	421.457	81.767
339.736	172.269	204.372	136.095	280.057	256.551	407.418	316.55	57.2095	81.9957
229.341	172.817	241.643	136.095	5.12187	258.014	46.8286	318.151	244.066	81.9957
198.107	173.229	91.3248	136.599	244.158	258.883	166.141	318.242	77.011	82.3158
291.993	173.229	38.0482	137.33	321.535	258.975	251.475	318.379	14.1309	82.7274
241.185	173.458	48.0176	137.65	189.098	260.164	61.3253	318.699	327.8	83.139
214.524	174.281	269.904	137.879	404.857	260.484	83.6877	319.66	227.878	83.3676
312.114	174.738	9.69497	137.97	263.959	260.804	271.459	319.843	410.893	83.3676
166.369	174.83	148.672	138.839	207.527	260.895	320.483	319.98	26.2953	83.4591
63.0173	174.921	353.181	139.251	224.814	260.895	219.92	320.163	356.29	83.4591
34.4355	175.058	371.839	139.251	52.2248	260.987	291.81	320.254	101.02	83.6877
14.451	175.881	418.622	139.8	33.6123	261.216	197.467	321.123	134.266	83.6877
368.775	176.933	102.3	140.211	155.668	262.816	110.898	321.855	186.674	83.7792
326.199	177.802	332.464	140.852	129.419	263.731	29.9081	321.992	278.548	83.7792
109.617	177.894	393.195	140.852	110.349	263.868	12.3474	323.958	114.282	83.8707
426.35	178.122	254.767	141.034	70.5629	264.188	235.378	324.462	309.69	83.8707
396.717	178.305	68.3221	141.172	305.437	264.188			93.6114	84.0079
181.186	178.442	291.489	141.583	341.748	264.828			65.0295	84.328
356.702	178.534	76.9196	141.812	373.119	265.743			40.289	84.831
414.049	178.625	278.685	141.903	360.177	267.892			297.709	84.9682
250.514	178.763	219.372	142.132	393.332	269.036			320.071	85.1511
133.763	179.083	322.495	142.315	419.765	269.584			285.224	85.2883
143.915	179.494	402.433	142.315	89.587	269.676			141.675	85.6085
49.0694	179.586	176.75	142.635	171.217	270.225			151.553	85.6085
78.6116	181.049	378.836	142.635	231.125	270.636			202.223	85.8828
123.291	181.598	27.8959	143.504	284.081	271.459			346.092	85.8828
263.959	181.826	188.915	145.516	186.262	272.648			373.851	86.02
303.105	182.009	122.833	145.608	143.915	273.609			4.29871	86.4316
4.80176	182.467	231.033	145.928	28.4447	274.249			47.6974	87.392
93.9315	182.878	160.013	146.156	249.874	274.249			158.961	87.392
379.247	183.061	139.8	146.248	51.4017	275.301			336.58	87.4834
275.484	183.198	303.654	146.339	268.212	275.484			259.935	87.7121
205.424	183.701	15.5943	146.659	325.147	275.484			251.795	87.8035
153.107	183.93	261.719	146.659	429.506	277.084			366.443	88.4438
344.949	184.89	409.841	147.208	14.5425	277.816			20.579	88.6724
20.579	185.622	0.45731	147.391	215.164	278.365			417.158	88.7639
369.507	186.583	428.362	147.62	200.348	279.645			383.363	89.1755
237.161	187.543	245.347	147.848	162.528	279.965			84.9682	89.4041
431.381	187.634	315.818	148.031	313.623	280.377			241.414	89.4041
68.002	187.726	110.898	148.168	372.571	280.377			172.817	89.587
188.275	187.726	342.525	148.489	294.005	281.977			122.833	89.7242
39.5573	188.183	83.5963	149.632	341.108	282.572			32.8806	89.8157
168.885	188.183	198.747	150.043	408.241	283.212			391.412	89.8157
321.535	188.183	55.5174	150.181	62.9259	283.761			105.273	89.9072
334.019	188.366	71.9349	150.272	126.538	284.721			218.777	90.0444
56.8894	188.595	334.156	150.364	99.5564	285.041			402.616	90.0444
415.009	188.686	210.591	150.592	175.333	286.413			424.887	90.0444
285.682	189.098	45.7767	150.775	415.558	286.596			313.486	90.4559
388.668	189.418	95.9437	150.912	82.8189	286.733			97.4528	90.6846
218	189.555	274.843	151.004	352.266	287.054			359.354	90.8675
251.383	190.058	350.665	151.095	38.597	287.374			330.224	91.0047
178.305	190.515	148.168	151.324	220.881	287.374			184.342	91.5078
105.593	191.75	374.034	151.873	389.811	287.877			194.311	91.8279
119.449	191.75	131.522	152.284	145.699	288.197			230.621	91.8279
89.9072	192.07	365.482	152.787	256.963	288.746			273.609	91.8279
312.251	192.39	7.13404	153.336	237.938	289.249			13.4906	91.9193
399.46	192.39	389.4	153.565	431.106	291.261			132.254	91.9193
298.166	192.939	222.893	153.656	24.8319	291.489			69.191	92.5596
133.443	194.723	159.601	153.885	276.124	292.45			253.396	92.5596
351.168	194.723	30.7312	154.388	113.962	293.09			77.5598	92.8797
361.046	195.774	118.489	154.708	203.732	293.182			301.55	92.8797
236.018	196.323	295.285	154.708	320.163	293.41			262.999	93.1083
24.8319	196.735	184.662	155.028	333.196	294.233			291.901	93.84
205.012	196.963	252.207	155.028	378.287	294.325			144.327	94.2516
144.556	197.284	285.453	155.348	10.1066	295.194			165.18	94.3888
266.2	198.198	18.0637	156.309	56.1577	295.285			202.223	94.5717
336.352	198.656	201.811	156.4	187.406	295.514			348.562	94.8004
47.6974	199.159	171.034	156.629	303.883	296.474			377.647	94.8004
381.259	199.159	237.938	157.269	243.518	297.709			281.977	94.8918
76.9196	199.296	422.326	157.452	87.6206	298.669			340.925	94.8918
282.389	199.479	313.074	157.589	263.731	299.858			209.631	95.029
425.619	199.616	409.43	157.589	137.97	299.95			401.701	95.212
370.147	200.439	399.049	157.909	410.985	300.681			153.976	95.4406
13.3992	200.53	325.696	158.092	72.8952	301.642			410.985	95.5321
64.7551	201.079	431.426	158.504	213.061	301.642			321.123	95.6235
104.953	201.811	209.036	158.641	395.985	301.642			43.1243	95.9437
412.036	202.451	79.3433	158.961	364.293	304.386			391.412	95.9437
155.897	202.543	140.12	158.961	175.79	305.254			115.334	96.1723
219.6	202.68	67.0417	159.784	156.08	305.895			224.585	96.2638
247.13	202.68	56.4778	159.921	350.848	305.895			431.106	96.2638
399.46	202.68	259.935	160.333	329.4	306.535			368.958	96.4924
89.4956	203	44.6335	160.653	103.169	306.718			420.954	96.4924
192.71	203.732	356.885	160.836	281.429	307.038			307.998	96.7211
172.497	204.372	226.506	161.156	117.437	307.587			125.715	97.1327
115.334	204.875	101.34	162.345	21.5393	307.77			25.9752	97.2241
40.7921	205.332	342.617	162.345	226.277	308.227			61.6454	97.4528
345.452	206.704	153.336	162.528	245.667	310.834			215.988	97.8644
313.166	206.796	375.955	163.077	414.597	310.971			100.837	98.1845
325.971	206.796	128.55	163.488	194.494	311.291			8.32304	98.2759
267.755	206.887	88.8554	163.808	380.208	311.794			135.227	98.2759
299.218	207.344	244.158	164.037	39.0086	312.023			88.1237	98.7333
235.606	207.756	270.956	164.129	295.285	312.846			234.509	98.7333
142.132	207.939	186.171	164.22	59.4503	313.303			178.305	99.2363
423.606	208.716	31.6916	164.86	314.538	313.395			273.471	99.2363
285.682	208.808	297.206	165.18	262.816	314.538			53.0022	99.3278
4.39018	209.036	13.3992	165.318	88.3523	315.407			192.482	99.5564
384.323	209.448	306.306	165.821	135.547	316.047			244.569	99.5564
127.727	209.631	117.117	166.232	212.1	317.19			333.836	99.5564
60.4107	210.591	412.814	166.781	8.18585	318.151			361.138	99.5564
277.404	210.591	204.875	167.65	154.388	318.562			34.0239	99.968
360.406	210.591	366.305	167.833	428.134	319.431			170.165	99.968
205.424	212.1	328.623	168.061	280.788	319.66			288.105	100.105
373.942	212.192	174.281	168.153	363.973	320.254			296.794	101.569
394.796	212.603	392.372	168.382	341.108	321.215			16.4632	101.797
410.344	213.061	431.289	168.565	185.714	322.587			73.0782	101.98
250.286	213.152	53.9169	168.702	101.157	322.815			260.987	101.98
16.7833	213.472	286.413	168.793	231.125	323.044			159.693	102.117
185.851	213.472	256.551	169.113	298.258	323.684			81.9042	102.62
75.5476	213.655	137.97	169.342					352.998	102.62
219.097	214.113	106.553	170.074					374.583	102.758
28.4447	214.433	225.637	170.165					393.973	102.758
164.357	214.616	351.809	170.257					184.479	103.032
431.335	215.805	193.671	170.714					147.208	103.261
260.667	216.308	24.4204	170.805					345.589	103.261
50.67	216.445	313.395	170.897					413.225	103.261
333.425	216.628	166.141	172.406					251.978	103.672
302.053	217.359	155.257	172.817					117.254	103.809
351.626	217.817	246.261	172.817					317.007	103.901
91.3248	219.189	381.259	172.817					363.562	103.901
232.725	219.28	35.8531	172.909					94.8918	104.13
38.6884	220.149	66.8587	173.458					267.984	104.13
107.376	220.652	270.956	173.641					325.559	104.221
412.036	220.789	403.713	173.778					60.8222	104.312
312.251	220.881	420.634	173.961					200.119	104.541
288.746	220.972	78.383	174.281					279.508	105.181
146.248	221.064	90.3645	174.738					134.266	105.364
382.54	221.612	7.27123	174.83					36.2647	106.233
131.843	222.024	337.312	174.83					235.698	106.233
173.138	222.801	178.122	175.241					227.237	106.325
247.954	223.396	392.692	175.973					422.006	106.462
362.418	223.533	210.728	176.11					43.856	106.645
371.702	224.356	260.347	176.43					209.768	106.645
119.77	224.585	127.91	176.75					404.628	106.645
325.879	224.905	322.587	176.75					25.2435	106.736
424.887	224.997	289.477	177.07					218.137	106.965
157.909	225.408	100.837	177.482					165.501	107.514
274.66	225.408	45.6853	177.894					306.215	107.605
401.564	225.637	139.159	177.894					126.446	107.697
206.247	225.957	218.457	177.894					10.9754	107.925
57.8497	226.186	54.6943	178.122					73.6269	107.925
191.11	226.369	199.799	178.122					335.391	108.337
297.938	226.597	301.413	178.442					85.2883	108.474
83.4591	226.689	116.065	178.854					288.608	108.474
346.824	226.78	16.3717	180.226					106.645	108.565
0.685965	227.969	365.071	180.226					190.058	108.565
391.412	229.981	233.137	180.866					52.4535	108.886
223.213	230.621	344.629	181.689					379.247	108.886
251.566	231.902	279.508	181.918					142.132	109.068
335.849	231.902	85.8828	182.878					173.458	109.937
264.371	232.222	182.009	183.61					370.238	110.349
31.0514	232.314	357.205	183.61					246.81	110.578
99.968	232.314	157.772	183.701					150.684	110.761
145.196	232.496	307.77	183.701					101.477	110.898
15.1827	233.045	243.655	184.159					314.675	110.898
69.2825	233.045	65.6697	184.25					295.834	110.989
307.678	233.365	31.6001	184.342					357.434	111.081
169.113	233.594	172.909	184.342					389.4	111.218
360.406	234.234	334.019	184.799					17.9266	111.309
414.826	234.417	375.223	184.799					184.022	111.309
178.625	235.149	418.073	185.211					258.883	111.309
430.375	235.286	388.851	186.034					115.654	111.538
132.894	235.378	253.396	186.171					64.5265	111.629
231.765	236.338	318.562	186.262					397.54	112.178
292.77	236.338	191.11	186.354					272.511	112.453
41.4323	236.658	407.097	186.491					428.682	112.453
375.131	236.749	137.788	186.674					30.3197	112.59
59.0387	237.161	214.296	186.765					199.707	112.59
349.293	237.71	273.609	187.086					413.225	112.59
193.442	238.03	291.169	187.634					348.333	112.681
280.697	238.213	427.814	188.046					231.445	113.23
402.433	238.67	46.8286	188.183					306.215	113.23
108.977	239.082	101.569	188.183					322.175	113.23
323.455	239.082	118.169	188.503					158.412	113.55
2.28655	239.493	17.4235	189.555					327.983	113.55
151.873	240.042	234.829	190.515					207.024	114.373
84.328	240.682	78.0628	190.927					126.446	114.602
215.805	241.323	110.029	191.018					91.5992	114.693
205.195	241.505	141.675	191.018					219.189	114.693
418.21	241.643	2.28655	191.659					71.6148	115.013
264.828	241.826	61.5539	192.207					51.9047	115.334
118.077	243.198	348.562	192.939					134.266	115.425
305.575	243.518	205.927	193.122					238.762	115.562
17.8351	243.838	263.228	193.122					39.9689	115.882
339.233	244.158	359.126	193.579					361.549	115.882
234.509	244.569	396.396	193.671					110.486	115.974
97.9558	244.89	28.6276	193.899					406.549	115.974
33.7038	245.758	129.51	193.899					279.965	116.385
316.367	246.17	308.639	194.082					177.574	116.614
134.724	246.399	329.675	194.311					9.1462	116.706
176.842	246.49	158.641	194.494					192.802	116.797
365.985	246.81	375.635	194.494					167.193	117.574
45.5938	247.679	171.857	195.271					421.366	118.306
64.938	248.594	86.6603	195.774					266.2	118.489
399.552	248.594	194.723	196.003					80.6238	118.718
270.545	248.914	97.9558	196.323					372.799	118.718
288.929	249.234	317.51	198.015					20.579	118.946
386.015	249.234	429.963	198.107					391.732	119.358
244.707	249.783	287.557	198.198					256.551	119.678
354.37	250.286	67.8191	198.335					100.288	119.907
6.40234	250.514	219.829	198.518					353.638	119.907
149.083	250.514	246.719	198.976					383.455	119.907
189.235	250.514	385.924	199.067					247.039	119.998
226.186	250.743	8.41451	199.159					427.631	120.41
206.887	252.435	408.012	199.707					119.998	120.501
162.665	252.527	340.696	199.936					141.355	120.821
374.994	252.527	269.584	200.21					398.591	120.821
408.561	252.527	37.6366	200.53					230.713	121.141
423.789	252.938	183.61	200.851					58.2613	121.279
299.538	254.219	415.42	202.04					50.67	121.462
254.63	254.447	116.934	202.36					12.2102	121.599
324.416	255.179	138.611	202.451					187.863	121.599
139.48	255.819	150.775	202.543					344.949	121.599
110.349	255.911	229.981	202.863					335.391	121.69
341.108	255.911	47.6974	203.412					315.315	121.782
50.7614	256.231	295.285	203.64					91.0962	121.919
81.264	256.231	77.8799	203.915					152.193	122.193
173.641	256.231	239.722	203.915					213.472	122.193
32.0117	256.551	357.754	203.915					297.709	122.33
95.4406	257.374	367.997	204.143					66.2185	122.422
123.291	258.334	129.007	204.463					327.48	122.742
69.6941	259.203	168.153	204.783					306.398	122.971
284.081	259.615	252.115	204.875					129.099	123.062
309.462	259.615	106.004	205.332					163.626	123.062
15.7315	259.935	21.9509	205.424					238.213	123.154
200.668	260.255	197.924	205.927					30.3197	123.382
231.582	260.895	392.372	206.064					366.946	124.022
214.936	261.078	208.808	206.247					271.688	124.114
391.503	261.719	318.151	206.704					413.225	124.114
360.726	262.267	377.418	206.796					40.6091	124.343
401.793	262.267	303.562	207.116					201.308	124.343
272.328	262.587	264.188	207.207					172.497	124.846
243.426	262.679	404.445	207.665					0.45731	125.303
160.973	264.051	56.7065	207.756					289.066	125.486
331.184	264.051	276.856	207.847					80.4866	125.623
348.836	264.051	330.132	208.168					192.207	125.806
258.152	264.371	8.41451	208.808					374.491	126.035
188.275	264.691	186.034	208.899					392.143	126.035
421.274	265.103	428.454	209.128					279.737	126.355
43.2615	266.383	95.1205	209.448					104.312	126.538
134.586	266.703	134.083	210.82					137.788	126.675
100.197	267.023	30.6398	211.552					351.717	126.995
295.285	267.343	344.949	211.872					404.216	126.995
63.5661	267.435	153.565	212.283					418.21	126.995
174.189	267.892	223.716	212.421					21.8594	127.178
321.352	268.395	247.13	212.512					209.631	127.407
369.689	268.395	83.5963	212.924					115.654	127.498
24.9234	268.715	289.889	212.924					252.115	127.91
7.59135	268.807	42.6213	213.381					262.587	128.138
112.361	269.447	173.869	214.433					296.017	128.23
79.4348	269.904	269.264	214.844					149.54	128.367
146.888	270.225	392.052	215.256					320.894	129.007
227.558	270.316	337.952	216.216					69.9227	129.327
311.382	270.316	363.241	216.308					47.8804	129.419
206.064	271.459	419.765	216.308					57.7583	129.602
337.312	272.1	408.469	216.445					98.093	129.83
407.509	272.328	312.343	216.536					312.114	130.15
123.794	273.06	112.041	217.085					30.8684	130.242
239.951	273.609	378.927	217.268					342.205	130.242
379.888	273.792	298.989	217.359					226.048	130.379
253.99	275.392	208.899	217.588					330.544	130.471
196.323	276.124	143.504	217.68					426.762	130.699
39.6488	276.535	101.248	217.817					157.589	131.111
391.732	276.535	163.305	218.228					122.971	131.339
282.709	276.993	55.426	218.32					357.342	131.339
53.7339	277.084	65.8984	218.548					37.7281	131.751
345.909	277.404	18.1552	218.64					88.3523	131.843
295.514	277.496	127.086	219.509					303.654	131.843
91.0962	278.365	230.804	219.509					400.421	131.843
422.737	278.365	354.049	219.829					10.6553	132.071
151.873	278.776	4.61883	220.149					236.018	132.163
17.8351	279.188	323.455	221.612					367.997	132.574
263.411	279.188	251.246	221.841					199.616	132.803
104.953	279.325	343.989	222.253					246.079	133.032
325.376	279.325	189.967	222.344					411.853	133.032
358.257	279.416	400.924	222.573					217.268	133.123
168.382	279.828	81.0354	223.076					189.646	133.214
220.012	279.965	201.948	223.853					268.807	133.626
180.775	280.148	176.522	224.997					78.4744	133.763
68.9624	280.788	35.533	225.088					133.626	134.175
410.024	281.977	214.844	225.088					281.109	134.403
135.867	282.709	283.669	225.088					169.113	134.586
307.129	283.212	266.795	225.225					373.851	135.227
121.69	283.944	91.0962	225.545					114.693	135.318
272.328	284.172	366.443	225.728					177.665	135.455
431.335	284.584	379.247	225.728					259.295	135.455
374.674	285.224	113.413	225.865					348.333	135.455
3.9786	285.453	336.992	225.957					18.4753	135.775
205.424	285.682	152.056	226.048					289.249	135.775
232.634	285.773	419.033	226.597					70.2428	136.187
86.8432	286.505	140.12	226.78					419.673	136.187
244.249	286.916	63.0173	227.42					52.4535	136.827
25.7923	287.054	164.037	227.42					393.195	136.827
341.656	287.054	239.402	227.74					105.501	137.056
362.738	287.236	51.7218	228.198					154.708	137.147
60.7308	288.425	389.308	228.701					208.808	137.239
108.474	288.425	14.7711	229.432					97.9558	137.33
194.403	289.249	101.569	229.432					334.888	137.559
329.904	289.889	72.1635	229.661					405.908	137.559
216.628	290.209	399.049	229.661					381.442	137.97
414.506	290.941	310.834	230.21					142.955	138.108
399.14	291.078	126.995	230.393					310.834	138.519
293.41	291.398	248.594	230.53					318.699	138.519
142.452	291.81	41.5695	231.353					360.406	138.519
388.348	291.81	187.223	231.353					241.323	138.611
315.818	292.13	355.513	231.582					63.1545	138.748
256.78	292.861	289.066	231.765					273.792	138.748
267.115	293.593	26.2039	231.902					42.4841	138.931
35.7159	293.685	410.344	232.085					229.753	138.931
132.803	294.142	326.519	232.222					2.60667	139.342
356.382	294.142	299.721	232.314					123.885	139.891
373.714	294.142	81.6756	232.725					222.664	140.211
158.321	294.462	372.25	233.914					191.887	140.303
48.9779	295.514	196.095	234.006					31.5087	140.76
75.5476	296.017	224.265	234.509					89.3127	140.76
176.202	296.017	344.537	235.286					133.123	141.263
283.349	296.245	115.974	235.378					248.274	141.263
238.213	296.566	207.665	235.698					326.291	141.263
104.221	298.669	3.33836	236.018					201.308	141.355
92.0565	299.309	152.924	236.246					160.104	141.492
341.976	300.498	426.442	236.338					284.401	141.492
14.8626	300.91	13.8108	236.749					264.6	141.675
328.76	301.002	263.639	237.298					169.845	141.812
122.513	301.093	162.437	237.801					343.028	141.812
201.399	301.413	317.968	238.213					426.259	142.315
217.908	301.733	175.79	238.35					12.0273	142.772
385.924	301.962	397.357	238.441					396.396	143.275
299.127	302.282	47.4688	239.31					412.174	143.595
27.027	302.373	388.576	239.31					256.551	144.007
150.775	302.694	105.364	239.722					21.3107	144.236
421.457	302.694	331.596	240.225					57.118	144.327
407.189	303.014	243.746	240.774					182.97	144.464
229.981	303.654	415.238	240.865					214.844	144.556
267.572	303.654	137.65	241.002					78.383	144.647
311.474	303.745	27.1642	241.734					106.553	144.647
369.415	303.883	60.8222	241.734					145.928	144.876
59.1302	304.706	283.349	242.146					117.026	145.059
188.686	304.934	89.1755	242.374					333.516	145.196
3.8414	305.254	231.902	242.374					369.095	145.196
354.69	305.254	309.05	242.877					388.439	145.196
112.453	305.666	196.826	243.335					166.552	145.516
70.8831	306.626	369.278	243.335					69.8313	145.608
243.838	307.038	211.872	243.838					296.794	145.608
169.113	307.267	38.0482	244.066					353.089	145.608
134.266	307.678	358.806	244.249					235.149	145.928
285.682	307.998	73.6269	244.478					288.608	145.928
253.807	309.69	390.36	245.941					376.183	146.019
81.0354	310.011	180.958	246.079					41.2494	146.156
144.784	311.382	14.9998	246.17					307.907	146.156
203.503	311.474	405.177	246.261					193.122	146.476
401.564	311.794	121.69	246.399					51.9047	147.071
322.266	311.931	344.72	246.49					275.712	147.391
27.5758	312.343	274.112	246.719					205.012	147.528
428.362	313.074	292.45	247.954					320.071	147.94
383.363	313.303	1.73778	248.091					89.3127	148.26
48.8407	313.395	336.352	248.091					358.257	148.351
216.308	313.395	261.307	248.182					346.824	148.58
345.681	313.715	108.474	248.594					419.673	148.672
96.7211	314.264	155.76	248.731					3.8414	148.763
158.824	314.264	91.4163	249.234					404.765	148.763
365.574	314.446	422.646	249.371					136.187	148.9
13.9022	314.995	222.344	249.554					225.225	148.992
334.477	314.995	318.791	250.606					30.5483	149.083
291.078	315.178	378.287	250.743					250.103	149.083
189.006	316.276	141.812	250.926					99.7851	149.54
123.702	316.459	43.6731	251.658					187.634	149.632
175.79	316.687	167.193	251.658					151.644	149.723
231.125	317.19	230.073	251.795					159.373	150.181
112.681	317.51	55.426	252.618					260.895	150.592
267.023	317.51	304.065	252.755					429.003	150.912
417.57	317.51	100.928	253.075					125.303	151.324
277.496	317.648	78.383	253.258					13.8108	151.415
68.002	318.471	122.833	253.396					383.455	151.644
304.386	318.471	361.366	253.807					111.858	151.873
245.941	320.391	17.1949	254.127					215.347	151.964
353.409	320.712	185.851	254.31					243.746	152.193
317.007	321.032	350.986	254.539					173.778	152.467
375.314	321.352	243.838	254.95					328.211	152.467
405.588	321.855	27.2557	255.088					419.994	152.787
143.275	321.992	417.753	255.362					410.482	153.016
387.708	322.084	405.817	255.591					197.787	153.107
40.6091	322.815	135.044	255.682					290.3	153.245
212.603	323.044	329.492	256.231					310.742	153.336
225.088	323.867	197.375	256.551					299.721	153.565
3.33836	324.69	288.517	256.642					66.5386	153.656
		207.344	257.603					270.087	153.656
		62.4228	257.694					280.468	153.656
		385.375	257.694					335.94	153.656
		253.258	257.831					81.264	153.748
		273.151	258.655					395.436	153.976
		113.733	259.203					140.623	154.296
		396.579	259.295					44.8164	154.479
		219.829	259.706					23.2314	154.708
		152.924	260.804					206.567	155.028
		170.577	260.804					93.7486	155.348
		45.8682	260.987					376.915	155.577
		367.997	261.216					3.33836	155.668
		426.762	261.216					52.362	155.668
		315.635	261.719					344.08	156.08
		339.324	262.587					354.461	156.217
		74.9989	262.816					257.1	156.309
		179.174	263.639					105.364	156.949
		326.84	263.639					164.86	157.04
		410.161	263.639					223.076	157.132
		141.583	263.959					426.762	157.132
		234.646	264.051					228.518	157.681
		104.312	264.6					36.5848	157.772
		90.3645	265.331					176.202	157.772
		26.524	265.88					116.294	158.092
		290.529	265.972					387.479	158.184
		65.8984	266.383					286.916	158.321
		249.554	266.383					403.393	158.412
		351.397	266.52					318.791	158.504
		301.87	266.612					149.083	158.732
		379.156	267.023					362.738	158.824
		191.75	267.435					83.5963	159.052
		37.3165	267.572					126.035	159.052
		3.8414	267.755					158.412	159.052
		18.704	268.807					70.9745	159.144
		120.318	268.944					272.237	159.601
		280.24	268.944					60.5936	159.693
		205.424	269.356					247.45	159.693
		163.626	269.676					265.423	159.693
		222.893	269.996					296.154	160.013
		52.7736	270.087					182.97	160.196
		150.501	270.545					201.948	160.333
		264.691	270.728					309.05	160.333
		341.108	270.956					237.618	160.653
		403.256	271.688					327.891	160.653
		136.095	271.917					337.541	161.293
		366.946	272.008					192.299	161.385
		429.323	272.648					412.997	161.385
		310.559	273.609					216.308	161.796
		392.784	273.609					420.725	161.934
		106.462	273.7					18.4753	162.025
		81.264	274.112					53.9169	162.208
		291.901	275.072					94.5717	162.345
		321.032	275.484					394.476	162.345
		355.421	275.484					139.068	162.985
		419.353	275.484					121.69	163.168
		171.217	275.621					178.854	163.488
		68.8709	275.712					318.699	163.717
		8.64316	276.261					430.969	163.9
		237.938	276.444					44.6335	164.037
		118.306	277.084					221.384	164.129
		26.2953	277.496					76.6909	164.769
		95.5321	277.496					147.62	164.769
		225.545	277.724					371.199	164.86
		178.763	277.816					37.5452	164.997
		58.3985	277.953					260.255	165.18
		410.893	277.953					352.449	165.18
		44.6335	278.227					379.247	165.318
		382.951	278.227					112.178	165.638
		192.482	278.868					360.406	165.821
		211.232	278.868					100.837	165.912
		367.266	279.188					27.3471	166.141
		274.752	279.645					230.301	166.232
		147.071	279.737					165.729	166.69
		331.275	279.965					152.924	167.101
		254.95	280.148					245.347	167.101
		345.452	281.337					278.685	167.101
		129.739	281.977					301.322	167.101
		110.349	282.16					131.934	167.65
		200.668	283.212					199.159	167.65
		247.039	283.761					406.549	167.741
		160.516	283.944					64.938	167.924
		316.459	284.081					270.545	168.061
		264.051	284.172					188.046	168.153
		34.9842	284.493					88.4438	168.244
		16.3717	285.133					345.269	168.473
		72.5751	285.133					385.467	169.113
		303.014	285.133					4.07006	169.936
		423.149	285.133					209.219	169.936
		287.145	286.413					333.516	169.936
		171.537	286.505					327.16	170.165
		53.5967	286.596					12.1187	170.485
		228.381	286.733					415.42	170.485
		394.887	287.054					308.822	170.897
		103.352	288.608					370.33	171.034
		90.8675	288.837					286.596	171.217
		377.875	289.477					145.059	171.446
		4.80176	289.66					253.258	171.446
		405.085	289.66					181.689	171.857
		356.885	289.797					296.794	171.857
		325.239	289.98					160.653	171.949
		340.696	291.169					40.289	172.086
		212.603	291.489					427.311	172.177
		116.934	291.81					56.7979	172.497
		20.4875	291.993					260.027	172.589
		61.1424	292.541					396.899	173.046
		129.922	292.77					124.434	173.366
		236.109	293.182					105.913	173.641
		79.4348	293.273					173.458	173.641
		181.506	293.273					71.6148	173.869
		191.11	293.685					317.419	173.869
		272.831	294.005					222.801	173.961
		368.958	294.142					134.403	174.098
		248.594	294.325					193.671	174.098
		45.8682	294.462					28.9477	174.418
		418.073	294.553					49.8925	174.51
		295.102	294.874					409.43	175.15
		153.748	295.514					112.361	175.241
		29.1764	296.154					233.137	175.241
		386.656	296.154					342.845	175.241
		264.371	296.794					361.229	175.241
		429.094	296.794					82.3158	175.79
		142.544	296.977					352.266	175.881
		352.54	297.526					95.212	176.202
		202.863	297.938					246.49	176.476
		331.824	298.166					387.479	176.202
		310.742	298.258					267.755	176.522
		96.8125	298.669					378.287	176.522
		407.829	298.669					203.503	176.613
		219.6	298.806					304.065	176.75
		130.791	299.127					419.445	177.07
		19.0241	299.401					64.5265	177.345
		4.07006	299.538					153.656	177.665
		112.27	300.819					276.444	177.985
		167.193	301.55					330.224	177.985
		279.325	301.642					161.385	178.305
		379.156	301.733					88.8554	178.534
		56.2491	301.962					213.381	178.534
		66.127	301.962					1.55485	178.625
		179.814	302.694					10.7468	179.083
		246.81	302.694					285.224	179.083
		34.2525	302.922					351.077	179.997
		359.766	302.922					313.943	180.317
		338.592	303.014					26.7069	180.637
		390.451	303.654					35.2129	180.637
		81.6756	303.745					189.326	180.637
		318.882	303.745					139.068	180.866
		233.594	304.386					129.419	180.958
		142.315	305.437					225.408	180.958
		302.602	305.666					255.362	180.958
		193.259	305.758					361.366	180.958
		289.477	306.398					322.907	181.049
		269.996	306.626					44.1762	181.369
		418.713	306.809					167.833	181.369
		130.059	307.267					174.921	181.369
		222.481	307.587					399.872	181.598
		98.9162	308.547					100.837	181.826
		399.872	308.547					54.8772	181.918
		206.476	309.37					116.065	181.918
		258.334	309.37					293.822	182.009
		160.973	309.782					369.827	182.009
		429.003	309.782					391.503	182.33
		117.986	310.239					429.323	182.467
		61.6454	310.422					70.4715	182.878
		42.3926	310.742					239.402	183.061
		346.001	310.742					196.826	183.381
		372.342	310.971					15.2742	183.519
		14.5425	311.062					411.625	183.839
		149.312	311.154					267.252	184.159
		24.1917	311.291					232.222	184.25
		76.9196	312.663					217.817	184.342
		108.017	312.663					146.476	185.302
		183.61	312.754					248.822	185.302
		236.246	313.715					383.134	185.302
		357.022	313.806					80.7152	185.394
		407.097	314.264					160.013	186.171
		284.264	314.446					61.1424	186.262
		170.897	315.315					91.8279	186.354
		325.376	315.407					279.828	186.583
		203.503	316.138					7.13404	186.674
		302.602	316.276					310.011	186.674
		221.064	316.687					184.159	186.765
		92.4681	317.007					208.488	186.765
		312.983	317.51					106.142	187.223
		382.723	317.648					328.943	187.223
		337.312	318.059					421.777	187.223
		394.156	318.379					300.361	188.183
		243.426	318.471					122.833	188.686
		272.831	318.471					50.67	189.098
		132.071	318.791					343.669	189.555
		37.8653	320.071					133.626	189.646
		259.386	320.071					32.5605	189.738
		423.789	321.443					114.373	189.875
		120.821	321.672					173.869	189.875
		7.86573	322.175					194.311	190.058
		20.4875	322.404					372.571	190.058
		358.257	322.495					363.882	190.195
		51.173	323.135					393.104	190.378
		288.288	323.227					21.4478	190.79
		75.4104	323.958					354.049	190.927
		180.637	324.187					270.728	191.018
		370.33	324.279					246.261	191.247
		147.208	324.324					290.529	191.247
		106.142	324.507					256.963	191.43
		327.571	324.736					229.341	191.887
								408.012	191.887
								100.608	191.979
								82.0872	192.299
								42.4841	192.39
								238.67	192.482
								71.2946	192.939
								148.489	192.939
								164.449	192.939
								316.779	193.259
								426.67	193.259
								200.53	193.351
								220.652	193.351
								139.891	193.762
								322.724	193.762
								55.0144	193.991
								333.928	194.22
								385.055	194.22
								282.801	194.723
								209.539	194.951
								189.235	195.363
								12.5303	195.592
								177.345	195.592
								399.232	195.592
								32.4233	196.003
								91.5078	196.323
								109.709	196.323
								310.422	196.323
								411.305	196.506
								2.92678	196.735
								301.87	196.735
								418.53	196.735
								345.909	196.963
								61.6454	197.146
								365.711	197.467
								293.41	197.604
								128.458	197.787
								119.998	198.015
								257.374	198.335
								375.543	198.427
								153.885	198.518
								356.382	198.747
								275.712	198.838
								20.4875	199.159
								251.795	199.479
								168.061	199.616
								225.408	199.707
								71.2032	199.936
								197.284	200.119
								42.4841	200.439
								242.694	200.851
								214.844	200.988
								390.451	200.988
								235.469	201.079
								332.007	201.491
								318.151	201.719
								83.3676	201.811
								143.824	202.04
								52.2248	202.451
								185.942	202.863
								351.397	202.863
								7.13404	203
								404.445	203
								382.22	203.183
								425.07	203.412
								281.749	203.64
								110.029	203.732
								32.9721	204.052
								204.052	204.052
								339.553	204.052
								94.8918	204.372
								178.625	204.463
								364.11	204.463
								15.9144	205.332
								61.7826	205.424
								153.245	205.835
								257.694	205.835
								413.225	206.064
								122.422	206.476
								133.352	206.476
								372.022	206.796
								160.516	207.024
								46.1883	207.116
								230.393	207.756
								308.639	207.756
								79.6634	207.847
								397.86	207.939
								193.031	208.076
								216.948	208.076
								24.4204	208.259
								241.094	208.396
								100.928	208.488
								170.165	208.716
								250.835	208.899
								321.672	208.899
								115.013	209.539
								292.541	209.539
								54.3742	210.408
								36.4476	210.591
								200.21	210.591
								271.368	210.591
								88.3523	210.82
								263.731	210.82
								303.745	210.911
								378.927	211.369
								339.644	211.643
								158.321	211.872
								365.802	211.872
								388.759	211.963
								313.303	212.1
								419.582	212.192
								140.531	212.283
								281.749	212.283
								329.904	212.421
								4.61883	212.512
								67.9106	212.512
								427.082	212.832
								349.705	212.924
								209.631	213.381
								403.576	213.472
								130.562	213.564
								95.4406	213.884
								356.29	214.204
								181.049	214.296
								189.738	214.616
								61.9655	214.844
								234.326	215.256
								147.071	215.347
								168.382	215.485
								106.736	215.805
								414.049	215.805
								222.664	215.896
								22.1795	215.988
								72.255	217.085
								395.116	217.177
								43.5817	217.268
								81.5841	217.268
								265.331	217.268
								31.5087	217.497
								122.193	217.588
								253.67	217.817
								12.0273	218
								339.736	218.137
								204.052	218.228
								388.348	218.228
								320.071	218.457
								292.861	218.548
								215.485	218.96
								307.267	219.097
								427.631	219.692
								329.263	219.829
								272.648	220.012
								375.543	220.241
								153.016	220.469
								282.252	220.469
								298.578	220.652
								367.403	221.292
								53.8254	221.384
								86.9804	221.384
								115.654	221.384
								419.582	221.612
								405.908	221.841
								178.122	222.024
								348.745	222.253
								97.4528	222.344
								65.5783	222.573
								138.428	222.664
								357.525	222.664
								238.121	222.801
								195.454	222.984
								164.22	223.396
								126.766	223.533
								6.4938	223.625
								18.3839	224.265
								318.242	224.265
								107.056	224.356
								252.847	224.494
								185.851	224.814
								229.021	224.905
								384.003	224.905
								44.0847	224.997
								341.016	225.317
								31.3715	225.408
								311.931	225.408
								396.717	225.408
								146.019	225.728
								75.9592	226.048
								261.719	226.277
								170.714	226.369
								286.596	227.329
								216.628	227.878
								367.906	228.289
								329.172	228.381
								202.04	228.518
								304.614	228.701
								414.186	228.701
								95.8522	228.929
								269.036	229.112
								66.31	229.25
								88.0322	229.25
								242.786	229.25
								115.882	229.432
								131.202	229.432
								405.405	229.432
								234.417	229.57
								295.605	229.661
								152.924	229.753
								359.446	229.89
								181.918	229.981
								429.826	230.393
								55.6089	230.621
								161.293	230.804
								346.641	231.033
								376.183	231.033
								10.9754	231.125
								106.873	231.262
								208.396	231.353
								20.579	231.445
								44.7249	231.582
								121.462	231.582
								387.708	231.902
								394.796	233.137
								174.098	233.594
								256.139	233.594
								319.111	233.594
								77.4226	233.914
								218.869	234.234
								189.967	234.417
								420.542	234.509
								25.335	234.966
								138.428	234.966
								329.492	234.966
								277.953	235.057
								245.85	235.286
								87.392	235.378
								65.8984	235.926
								287.968	235.926
								313.074	235.926
								35.8531	236.109
								338.044	236.338
								410.024	236.749
								302.831	237.161
								198.656	237.481
								18.0637	237.71
								267.435	237.801
								147.62	238.213
								354.37	238.213
								382.723	238.213
								98.2759	238.533
								158.732	238.67
								226.597	238.762
								210.088	238.853
								369.689	238.99
								132.894	239.082
								235.469	239.082
								123.154	239.31
								168.244	239.31
								115.882	239.722
								180.866	240.134
								428.042	240.454
								190.79	240.545
								257.831	240.682
								30.8684	241.185
								78.383	241.185
								55.0144	241.323
								400.512	241.414
								343.348	241.643
								363.15	241.734
								392.281	242.054
								276.993	242.146
								295.377	242.146
								45.7767	242.374
								319.523	242.374
								66.8587	242.786
								141.034	243.106
								104.221	243.335
								285.544	243.335
								332.007	243.518
								381.031	243.838
								201.811	244.158
								246.261	244.158
								409.11	244.478
								421.914	244.478
								6.72246	244.707
								311.062	244.707
								127.178	245.027
								215.485	245.118
								170.074	245.438
								160.013	245.53
								191.11	245.941
								152.604	246.17
								266.2	246.17
								24.7405	246.719
								229.89	246.719
								372.799	246.902
								394.476	247.13
								303.745	247.862
								350.665	247.862
								114.465	248.091
								40.1518	248.182
								17.7436	248.274
								73.6269	248.274
								58.2613	248.411
								339.964	248.411
								256.963	248.594
								359.034	248.594
								210.591	248.822
								323.044	248.822
								429.414	249.143
								83.139	249.646
								183.701	249.783
								403.896	250.194
								96.1723	250.286
								239.951	250.286
								32.6519	250.606
								137.467	250.743
								415.649	250.743
								294.233	250.835
								330.635	250.835
								106.004	251.246
								277.633	251.246
								175.561	251.475
								48.5206	251.978
								308.639	252.115
								68.2307	252.618
								201.948	253.258
								9.55778	253.487
								117.346	253.807
								222.161	253.807
								284.721	253.807
								0.777427	253.899
								144.327	253.99
								381.762	254.31
								191.567	254.63
								248.274	254.63
								269.676	254.63
								152.193	254.767
								226.369	255.819
								214.936	255.911
								400.832	255.911
								131.431	256.139
								76.1879	256.231
								355.01	256.46
								41.7524	256.551
								363.241	256.642
								19.6186	256.871
								238.03	256.871
								316.55	256.963
								56.3863	257.1
								167.65	257.1
								388.988	257.511
								345.772	257.603
								160.196	257.831
								184.022	257.831
								327.388	257.831
								409.293	258.243
								374.354	258.334
								277.404	258.655
								25.335	258.883
								89.587	258.883
								303.654	258.883
								106.233	259.112
								420.542	259.295
								257.511	259.386
								335.3	259.706
								291.169	260.484
								64.2978	260.804
								136.416	261.216
								299.858	261.307
								10.3352	261.398
								248.411	261.627
								193.899	261.947
								383.134	261.947
								2.37801	262.039
								149.312	262.359
								40.1518	262.816
								397.128	262.908
								320.894	263.091
								96.7211	263.548
								173.549	263.639
								356.153	263.639
								414.506	263.639
								202.223	263.868
								115.425	264.051
								20.579	264.188
								366.854	264.188
								265.88	264.28
								32.9721	264.6
								50.0297	264.6
								123.885	264.6
								220.789	264.6
								283.944	264.6
								229.89	264.92
								165.821	265.011
								310.239	265.331
								84.9682	265.56
								58.8101	265.651
								334.66	265.972
								73.5355	266.52
								209.128	266.795
								387.616	266.795
								345.132	266.932
								253.67	267.115
								403.256	267.115
								183.381	267.572
								108.017	267.984
								141.812	268.212
								129.51	268.807
								155.348	269.127
								69.6941	269.447
								235.057	269.447
								289.249	269.676
								244.798	269.767
								270.407	269.767
								304.523	269.904
								374.354	270.316
								354.049	270.636
								200.988	270.728
								11.8901	270.819
								325.559	271.048
								316.687	271.368
								424.247	271.368
								175.241	271.688
								296.337	271.779
								44.9536	271.917
								116.706	271.917
								192.207	271.917
								94.7089	272.328
								397.448	272.328
								415.009	272.328
								85.0597	272.648
								22.9112	272.831
								55.0144	272.831
								360.269	273.38
								212.512	273.471
								3.9786	273.7
								223.076	273.929
								277.496	274.34
								33.2007	274.523
								166.369	274.752
								75.6391	274.843
								385.695	274.843
								341.565	275.072
								258.655	275.163
								331.093	275.392
								148.168	275.484
								368.866	276.032
								406	276.032
								141.903	276.124
								99.4649	276.352
								63.7948	276.444
								231.033	276.764
								157.04	276.856
								134.175	277.084
								377.144	277.084
								242.694	277.404
								109.389	277.724
								205.332	277.724
								267.343	278.136
								184.89	278.365
								308.822	278.365
								288.608	278.456
								318.151	278.776
								49.298	279.188
								123.291	279.325
								250.606	279.737
								173.458	279.828
								351.168	280.057
								11.8901	280.788
								75.7306	280.788
								413.546	280.788
								87.392	280.88
								392.281	281.109
								299.95	281.429
								225.408	281.52
								40.3805	281.657
								336.352	281.657
								427.082	281.657
								31.8288	281.749
								57.6211	281.977
								196.415	282.389
								259.844	282.801
								358.714	282.892
								386.976	283.029
								276.673	283.349
								21.2192	283.441
								327.251	283.532
								150.775	283.669
								181.826	283.852
								92.6968	284.172
								239.082	284.584
								139.571	284.721
								216.216	285.362
								345.681	285.362
								369.415	285.362
								310.102	285.453
								113.23	285.544
								131.431	286.093
								399.369	286.185
								298.989	286.916
								199.479	287.236
								165.821	287.465
								319.02	287.785
								65.3496	287.968
								420.314	288.105
								248.411	288.197
								408.881	288.197
								334.888	288.425
								98.4131	288.517
								10.3352	288.929
								280.56	288.929
								271.368	289.066
								76.3708	289.249
								123.291	289.386
								208.396	289.386
								383.134	289.386
								231.993	289.569
								29.588	289.889
								370.558	290.3
								41.8896	290.438
								54.4656	290.529
								155.44	290.529
								185.942	290.621
								260.987	290.758
								223.213	290.849
								426.442	290.849
								175.241	291.169
								360.726	291.261
								82.6359	291.581
								350.254	291.81
								308.73	292.221
								196.506	292.77
								241.505	292.77
								393.195	292.861
								147.528	293.09
								106.965	293.182
								90.4559	293.685
								137.559	294.142
								287.236	294.142
								402.844	294.142
								164.86	294.325
								16.2345	294.874
								338.592	295.194
								214.936	295.605
								114.465	295.697
								411.853	295.697
								326.519	296.017
								33.6123	296.566
								70.6544	296.566
								208.076	296.657
								422.326	296.657
								232.817	296.794
								316.047	296.794
								365.482	296.794
								381.9	296.794
								61.5539	296.886
								251.795	296.886
								269.036	296.886
								124.526	296.977
								277.953	296.977
								23.5515	297.297
								181.826	297.617
								258.014	298.258
								298.166	298.258
								41.4323	298.486
								390.68	298.578
								348.333	298.806
								79.0232	298.989
								52.5449	299.538
								190.058	299.538
								372.479	299.858
								7.77427	300.178
								156.4	300.361
								355.01	300.361
								402.296	301.322
								133.352	301.413
								144.967	301.413
								284.493	301.413
								306.398	301.413
								171.354	301.55
								106.462	301.733
								428.362	301.87
								239.402	302.053
								0.685965	302.282
								116.614	302.511
								224.585	302.694
								88.7639	302.922
								207.527	303.242
								163.9	303.883
								97.5442	303.974
								294.325	304.203
								259.203	304.843
								183.701	304.934
								29.1764	305.575
								47.6974	305.666
								63.1545	305.666
								15.0912	305.895
								344.08	305.895
								247.542	305.986
								411.305	305.986
								75.319	306.398
								274.752	306.535
								374.903	306.535
								395.528	306.535
								322.084	306.626
								423.698	306.626
								199.387	306.809
								314.355	307.038
								385.055	307.038
								146.339	307.267
								365.711	307.267
								36.3562	307.358
								264.188	307.587
								215.988	307.907
								230.713	308.547
								56.7065	308.73
								407.509	308.73
								352.037	308.822
								357.342	308.959
								186.491	309.599
								332.876	309.69
								93.0169	309.782
								301.093	309.782
								155.12	310.011
								172.909	310.331
								102.758	310.422
								289.797	310.422
								139.159	310.834
								279.828	311.291
								112.178	311.794
								224.356	312.343
								164.86	312.663
								208.076	312.754
								240.865	312.983
								8.73462	313.074
								66.127	313.074
								18.0637	313.303
								270.407	313.303
								83.2762	313.486
								259.935	313.486
								341.748	313.486
								395.116	313.486
								249.463	313.715
								308.227	314.355
								422.737	314.355
								129.419	314.538
								118.489	314.675
								43.4445	314.767
								377.006	314.858
								196.826	315.178
								150.043	315.956
								34.4355	316.047
								319.202	316.138
								52.362	316.367
								24.6033	316.55
								360.177	316.687
								429.963	316.779
								74.9989	317.099
								387.479	317.099
								1.41766	317.419
								297.206	317.419
								97.0412	318.059
								104.953	318.151
								191.75	318.471
								285.041	318.471
								179.997	318.699
								235.698	318.791
								345.772	318.791
								370.558	318.882
								225.728	319.431
								328.211	319.431
								139.571	319.98
								12.759	320.071
								207.024	320.163
								171.766	320.483
								89.4041	320.894
								382.22	320.894
								158.732	321.123
								312.023	321.855
								334.339	322.175
								396.396	322.175
								262.999	322.404
								412.814	322.815
								79.1146	322.907
								419.994	323.135
								44.4048	323.227
								117.026	323.227
								277.816	323.364
								301.87	323.547
								242.466	324.096
								252.938	324.279
								130.882	324.507
								354.781	324.507
								67.2703	324.69

## Sheet: DN5
Red		Green		Blue		Violet		Double
X	Y	X	Y	X	Y	X	Y	X	Y
80.6238	0.731696	14.7711	0.731696	277.724	0.503041	308.09	0.91462	27.9874	0.868889
206.064	0.548772	75.8677	0.594503	357.525	0.548772	221.933	1.3262	43.0329	0.777427
217.497	0.868889	101.66	0.868889	227.74	1.55485	246.399	1.3262	84.7396	0.868889
323.227	0.685965	371.29	1.09754	105.913	1.64632	158.641	1.55485	335.391	0.731696
348.242	0.777427	39.8774	1.55485	411.716	2.28655	259.112	2.92678	345.361	1.00608
134.083	1.55485	167.833	1.55485	92.5596	2.69813	296.794	3.01825	185.714	1.41766
401.061	2.92678	268.075	2.14936	190.515	2.92678	321.535	3.2469	329.08	1.41766
334.156	3.2469	248.091	2.37801	287.054	3.2469	338.592	3.56702	140.531	1.55485
96.5839	3.65848	182.33	2.46947	345.452	3.8414	48.6578	3.65848	315.818	1.55485
8.82608	4.39018	25.335	2.92678	381.762	3.9786	83.6877	4.39018	273.471	1.73778
372.25	5.57918	208.259	3.65848	115.425	5.03041	391.823	4.93895	20.8076	2.28655
231.125	6.08222	307.358	4.29871	316.367	5.25907	142.223	5.44199	112.91	2.78959
385.924	6.08222	135.867	4.71029	422.097	5.76211	66.31	5.85357	363.973	2.92678
38.597	6.40234	290.3	4.80176	159.693	6.4938	17.4235	6.40234	35.6245	3.01825
246.902	6.72246	325.147	4.80176	400.009	6.4938	271.276	6.40234	164.129	3.2469
297.709	6.95111	238.03	5.57918	255.819	6.631	126.355	6.81392	292.221	3.2469
26.1124	7.13404	196.506	6.17369	56.1577	7.04258	168.153	7.27123	283.669	3.33836
181.049	7.27123	6.81392	6.40234	71.2032	7.27123	34.6641	7.36269	71.2946	3.42983
151.644	7.45415	62.2856	7.04258	146.156	7.27123	376.366	8.00293	388.348	3.42983
280.468	7.59135	118.398	7.04258	176.522	7.59135	110.898	10.8382	303.883	3.9786
429.003	7.86573	354.781	7.04258	213.884	8.41451	183.29	12.3474	212.1	4.07006
259.523	8.41451	395.985	7.77427	134.175	8.50597	353.181	12.3474	377.144	4.16152
314.675	9.37486	48.3377	7.86573	307.129	9.05474	94.4803	12.8504	59.8619	4.39018
73.7184	9.46632	362.007	8.00293	203.091	9.37486	229.753	13.0791	195.363	4.39018
165.318	9.55778	405.817	8.09439	365.482	9.37486	211.643	13.3077	153.885	4.48164
122.33	10.8382	104.633	8.41451	14.8626	9.55778	405.908	13.3992	5.25907	4.61883
195.134	10.8382	155.348	8.50597	332.144	9.55778	430.969	13.5821	352.678	4.61883
413.317	11.387	222.253	8.50597	41.9811	9.78644	334.98	13.9022	54.5571	4.71029
327.388	11.5699	344.08	8.50597	27.8045	11.0669	246.261	15.1827	148.672	4.80176
287.054	12.1187	415.42	8.50597	376.366	12.1187	303.105	16.5546	235.469	4.80176
356.793	12.5303	385.147	8.82608	85.6085	12.759	276.032	17.4235	172.086	5.25907
205.104	12.9876	317.51	9.8779	295.102	12.8504	196.735	17.515	253.075	5.35053
368.226	13.3992	276.535	10.0151	264.6	13.7193	47.6974	17.6064	396.899	5.35053
137.467	14.0394	144.784	10.5181	240.865	13.9022	77.011	17.7436	407.097	5.35053
62.9259	14.5425	32.2404	10.6553	67.1789	14.2223	8.09439	17.8351	426.35	5.35053
380.528	15.5028	89.4956	11.1584	163.717	14.5425	149.632	18.3839	178.534	5.67065
398.5	15.5028	255.179	11.8901	345.452	14.6797	120.181	19.5271	243.335	6.17369
221.704	16.143	299.538	11.8901	120.821	14.9998	379.888	20.396	202.863	6.31088
92.148	16.2345	17.4235	12.3474	99.968	15.2742	288.425	20.4875	419.445	6.31088
37.0878	16.7833	188.366	12.3474	356.793	15.2742	169.845	21.2192	129.922	6.4938
108.474	18.0637	174.51	13.1705	319.843	17.1949	352.54	21.2192	108.565	6.81392
342.205	18.1552	268.944	13.5821	389.171	17.7436	32.1489	21.5393	369.095	6.95111
311.062	18.2467	284.493	13.8108	179.586	18.2467	17.6064	23.46	101.569	7.04258
246.079	18.5668	422.875	14.2223	225.545	18.2467	132.574	23.46	30.1367	7.27123
262.908	18.7954	372.342	14.6797	280.56	18.2467	339.736	23.46	264.371	7.45415
189.418	19.1156	235.789	15.0912	414.369	18.7954	320.483	23.5515	78.7945	7.77427
165.821	19.2985	327.16	15.0912	425.481	19.9387	259.935	23.8716	122.33	7.77427
22.9112	19.5271	59.0387	15.2742	142.544	20.579	62.8344	24.1002	276.535	8.18585
8.73462	20.579	203.915	15.4114	195.592	21.1277	415.969	24.4204	329.492	8.32304
146.979	20.579	4.29871	15.5943	398.088	21.1277	366.534	25.5636	312.114	8.41451
296.337	20.579	81.5841	15.7315	210.088	21.2192	106.325	25.9752	359.766	8.41451
82.4987	20.8076	213.564	16.3717	253.487	21.6308	184.89	28.4447	84.831	8.64316
420.634	21.3107	159.601	16.4632	86.8432	22.4997	220.561	28.5362	320.483	8.82608
234.006	22.1795	40.7921	16.6918	54.3742	22.5911	88.2151	29.3593	45.6853	8.96328
280.24	22.7283	363.058	17.7436	371.519	23.1399	430.375	29.4965	218.548	8.96328
50.7614	22.8198	338.272	17.8351	269.996	23.3228	236.018	29.8166	337.632	8.96328
176.293	23.0027	129.419	17.9266	307.678	23.46	274.66	31.1885	11.8901	9.2834
324.919	24.8319	27.3471	18.1552	330.315	23.46	246.81	31.5087	225.728	9.2834
354.69	24.8319	69.6026	19.2985	113.87	23.963	142.544	31.6916	285.773	9.2834
389.628	25.8838	382.311	20.4875	11.4785	24.4204	31.6916	31.9202	187.543	9.37486
129.922	27.6673	228.381	20.9905	237.801	24.4204	212.603	32.5605	411.442	9.37486
246.902	27.9874	110.669	21.1277	157.04	24.7405	326.611	32.7434	92.6968	9.46632
26.2953	28.5362	299.721	21.2192	342.617	24.8319	396.808	33.2922	21.3107	9.55778
68.002	28.7191	393.332	21.8594	34.8928	25.8838	201.811	34.0239	293.09	9.55778
227.649	28.9477	172.269	22.0881	123.794	26.1124	120.638	34.7556	52.6821	10.7468
265.24	28.9477	243.015	22.4082	410.482	27.027	288.608	35.0757	209.539	10.7468
364.202	28.9477	349.796	22.4082	74.7702	27.1642	60.9137	35.3043	381.259	10.7468
209.357	29.1764	404.308	22.9112	178.122	27.5758	418.942	35.533	268.532	10.8382
117.986	29.588	310.971	23.2314	21.3107	27.9874	174.189	36.2647	139.068	11.0669
306.398	29.588	95.8522	23.3228	65.1667	28.1246	345.452	36.5848	191.75	11.0669
103.352	29.9995	186.994	23.46	292.861	28.3075	8.00293	37.408	302.053	11.1584
400.924	29.9995	418.393	24.6033	356.382	29.1764	46.6456	37.408	171.949	11.2956
195.363	30.9599	137.788	24.8319	420.725	30.1367	156.812	37.9567	391.412	11.7986
333.196	31.0514	285.133	24.9234	169.022	30.9599	360.406	38.7799	403.073	11.8901
160.013	32.2404	149.54	25.2435	255.591	31.0514	186.354	39.0086	3.42983	12.0273
380.208	33.0635	161.156	25.5636	47.4688	31.3715	376.366	40.289	243.746	12.0273
8.18585	33.2007	374.903	25.5636	282.389	31.5087	105.044	40.3805	234.829	12.2102
430.603	33.7038	46.3255	26.2953	315.407	31.6916	311.611	40.7006	250.103	12.2102
413.317	33.9324	273.929	26.2953	100.928	32.9721	406.457	42.0725	418.393	12.2102
145.516	34.1611	260.987	26.524	368.638	33.2007	224.036	42.164	66.31	12.3474
278.776	34.1611	427.082	26.524	265.331	33.7038	94.0687	42.3012	348.562	12.3474
39.7402	34.344	322.815	27.6673	192.207	33.8409	262.176	42.7128	373.531	12.5303
55.5174	34.4355	11.4785	28.216	135.044	34.0239	133.214	43.4445	98.9162	12.759
318.471	35.7159	121.599	28.5362	222.253	34.0239	208.259	45.6853	128.779	12.9876
342.297	35.8531	250.194	28.5362	330.544	34.344	146.476	46.417	426.579	12.9876
181.278	36.036	36.036	28.7191	386.564	34.6641	295.514	46.7371	35.2129	13.0791
79.4348	36.2647	79.2518	28.7191	298.486	35.0757	331.275	46.7371	159.464	13.3077
257.831	36.4476	223.945	28.9477	238.121	36.3562	74.1757	46.8286	58.3985	13.8108
290.941	37.8653	202.771	29.0392	151.004	36.4476	30.8684	47.0572	151.324	13.9022
233.365	37.9567	339.233	29.6794	110.898	36.6763	390.36	47.8804	80.1665	14.0394
91.7364	38.1397	192.07	29.9081	202.771	36.9049	247.862	48.6578	200.53	14.1309
303.425	38.1397	54.8772	30.2282	247.13	37.0878	348.333	48.6578	343.028	14.1309
386.336	38.1397	359.446	30.3197	85.8828	37.408	123.885	48.8407	261.078	14.3595
365.711	38.2769	296.657	30.6398	73.6269	37.5452	56.2491	49.298	272.831	14.3595
347.693	40.7921	23.963	30.9599	355.101	37.8653	279.325	49.481	324.507	14.451
127.407	41.0207	238.35	31.5087	23.6429	38.1397	424.658	50.1212	115.974	14.7711
110.669	41.661	391.092	31.6001	286.185	40.1518	110.761	50.3498	217.085	14.7711
245.027	41.8896	111.218	32.5605	396.396	40.289	3.33836	50.5328	281.337	14.8626
327.983	42.6213	349.293	32.8806	272.1	40.9293	169.205	50.5328	108.565	14.9998
25.7923	43.1243	69.8313	32.9721	39.1	41.1122	193.259	51.4017	179.266	14.9998
220.881	43.7646	153.016	33.3836	165.089	41.3408	21.3107	52.1334	11.2956	15.1827
14.5425	43.9932	164.677	34.4355	410.664	41.5695	41.7524	52.362	309.279	15.1827
172.726	43.9932	212.741	34.4355	54.5571	41.9811	315.635	53.0022	24.1917	15.2742
378.516	44.4048	93.7486	34.6641	141.675	42.8042	403.805	53.3224	225.225	15.7315
43.2615	44.6335	404.537	34.6641	427.951	43.353	217.68	53.4138	363.058	15.7315
199.799	45.5938	270.087	34.8928	122.971	43.4445	235.378	53.5967	167.924	15.9144
270.728	45.7767	376.275	34.9842	214.844	43.4445	84.5109	54.4656	316.459	16.0516
65.8069	46.1883	127.818	35.0757	179.266	43.5817	362.098	56.0662	72.5751	16.2345
396.305	46.1883	142.223	35.533	338.913	43.9932	412.174	58.3985	386.244	16.4632
156.217	46.3255	178.305	35.9446	386.976	45.1365	272.511	58.7186	44.0847	16.5546
313.303	46.5084	307.358	36.036	254.31	45.6853	177.665	59.4503	292.13	16.7833
412.585	46.7371	82.1786	36.2647	303.242	45.6853	380.939	59.9534	133.443	16.8747
116.202	49.5724	333.196	36.5848	319.98	46.0054	336.031	60.0905	252.618	17.1034
363.79	49.8011	224.676	37.0878	362.098	46.417	296.245	60.8222	351.717	17.1034
282.48	50.0297	423.286	37.225	188.915	46.7371	158.504	61.3253	30.3197	17.1949
75.5476	51.3102	253.258	37.5452	227.969	46.8286	255.179	61.7826	143.275	17.515
338.501	51.4017	319.111	37.6366	202.451	47.0572	139.891	61.9655	429.414	17.515
95.3034	51.5846	13.9022	38.1397	85.6085	47.1487	203.32	61.9655	332.327	17.6064
214.204	52.6821	413.225	38.597	13.8108	47.6974	70.6544	63.0173	53.8254	18.0637
134.815	53.0022	33.9324	39.3287	101.797	48.2005	52.0419	63.3374	419.673	18.3839
355.65	53.1852	295.697	39.3287	32.3318	48.6578	108.337	64.1149	125.806	18.4753
299.63	53.3224	48.6578	39.4201	372.571	49.298	91.3248	64.2063	404.216	18.4753
254.127	53.9169	279.005	39.6488	131.339	49.481	419.445	64.7551	88.6724	18.5668
380.208	54.237	64.938	40.7921	416.198	50.1212	219.829	64.8466	187.086	18.5668
32.0117	54.6943	119.038	40.9293	238.213	50.5328	352.769	64.938	155.348	18.704
266.52	54.6943	362.281	41.2494	263.868	51.4931	10.7468	65.9898	409.201	18.704
191.75	56.0662	197.284	41.5695	328.532	51.5846	280.697	66.6301	19.6186	18.8869
317.968	56.2491	101.34	42.164	176.293	53.4138	239.813	66.7215	208.396	19.0241
422.326	56.5693	233.777	42.6213	69.6026	53.5053	31.5087	66.8587	299.538	19.1156
328.12	57.0266	345.132	42.7128	343.44	53.5967	312.251	67.8191	193.899	19.6186
237.71	57.118	22.8198	43.4445	46.8286	53.8254	124.754	68.1392	232.405	19.8473
108.337	57.7583	79.6634	43.6731	160.836	54.5571	193.122	70.0142	259.203	19.8473
15.0912	58.2613	5.67065	44.9536	308.318	55.0144	401.473	71.2946	174.098	20.0759
63.8862	58.3985	392.464	44.9536	431.335	55.5174	265.103	71.7062	395.436	20.1674
54.8772	58.49	138.748	45.4566	291.489	56.0662	83.5963	72.5751	306.215	20.396
160.973	58.9015	176.202	45.5938	282.48	56.2491	325.376	73.0782	269.356	20.7161
151.735	59.3131	260.987	45.5938	145.379	56.3863	133.123	73.8556	241.185	20.8076
247.954	60.182	418.85	46.0054	117.574	56.5693	163.397	74.2672	103.581	20.8991
274.34	60.2735	212.832	46.0969	245.438	56.7979	149.723	74.3586	374.994	20.8991
304.523	60.5936	185.073	46.417	59.1302	57.0266	246.81	74.5873	94.0687	20.9905
218.777	61.1424	91.8279	46.6456	19.2985	57.301	205.424	74.7702	137.788	20.9905
387.708	61.2338	369.186	46.6456	391.32	57.4381	43.4445	75.6391	369.689	21.1277
285.865	61.3253	381.031	46.8286	402.433	57.5296	336.992	76.6909	13.7193	21.3107
200.668	61.5539	273.38	47.1487	36.1732	58.2613	13.0791	77.011	63.7948	21.3107
83.3676	61.6454	41.5695	47.2859	207.344	58.3985	297.297	77.1025	115.425	21.768
174.281	61.9655	164.449	48.4291	99.6479	59.4503	53.3224	78.0628	325.056	21.9509
184.479	62.1942	305.895	48.4291	360.589	60.182	219.28	78.2915	219.28	22.271
406.777	62.9259	404.308	48.6578	319.34	60.2735	417.661	78.383	358.485	22.271
43.353	63.1545	355.01	48.7493	223.716	60.7308	99.1448	79.2518	4.29871	22.4997
231.765	63.246	286.916	48.8407	6.08222	61.2338	70.5629	79.3433	162.116	22.7283
363.882	63.246	153.336	50.2126	373.851	61.6454	176.11	80.1665	201.719	22.8198
344.4	63.3374	245.118	50.67	77.2397	61.7826	117.026	81.0354	292.77	22.8198
123.154	63.8862	223.533	51.0815	258.975	61.9655	377.418	81.4469	285.453	23.0027
397.448	65.3496	204.783	51.173	191.11	62.2856	390.771	81.4469	334.797	23.1399
257.511	65.8069	59.8619	51.3102	86.203	63.246	31.28	83.139	387.616	23.1399
101.797	67.0417	119.129	51.4931	269.904	63.8862	249.051	84.5109	43.856	23.46
22.7283	67.5904	127.498	51.4931	167.924	64.938	132.711	86.6603	345.772	23.46
334.019	68.3221	323.547	51.7218	295.377	64.938	406.32	86.6603	412.357	23.6429
316.459	69.6026	333.836	51.9047	234.509	65.0295	267.892	86.7517	315.818	23.7801
172.589	69.8313	144.647	52.5449	130.059	65.1667	421.777	87.0718	274.66	23.963
349.476	70.9745	78.4744	53.0937	427.722	65.8984	353.181	87.392	152.696	24.1917
410.985	71.6148	11.7071	53.3224	343.348	66.7215	84.7396	87.4834	180.546	24.2832
144.327	71.9349	388.439	53.4138	383.455	66.7215	323.455	88.0322	76.6909	24.4204
4.80176	72.255	93.9315	54.3742	402.204	66.8587	232.817	88.8554	58.7186	24.5118
373.942	72.4379	414.369	54.4656	141.995	67.0417	189.738	89.084	23.2314	24.7405
196.735	72.6666	195.271	54.7858	248.502	67.6819	11.387	89.4041	127.727	25.0149
54.7858	73.0782	104.861	55.7461	352.129	68.2307	103.809	90.5474	248.274	25.335
66.2185	73.2153	232.954	55.7461	304.523	68.4593	156.812	91.5078	377.738	25.335
280.24	73.5355	256.139	56.0662	327.16	68.5508	210.5	92.148	120.181	25.5636
292.861	73.7184	425.39	56.0662	153.656	68.8709	379.43	92.2394	265.56	25.9752
237.481	74.1757	66.9502	56.1577	214.616	68.8709	51.3102	92.6968	303.654	25.9752
210.728	74.2672	277.084	56.5693	202.543	68.9624	339.873	94.3888	224.814	26.6154
183.198	74.5873	370.147	57.118	282.572	69.0538	293.502	95.212	190.515	27.027
426.442	74.6787	215.576	57.4381	414.506	69.0538	117.117	95.3034	70.4715	27.3471
36.3562	74.7702	300.178	57.8497	8.82608	69.6941	146.248	96.401	82.4987	27.4843
158.184	75.2275	287.465	57.9412	59.1302	69.6941	271.459	96.904	337.312	27.4843
119.998	75.4104	183.061	58.8101	183.29	69.6941	174.189	97.0412	100.288	27.6673
266.063	76.1879	132.483	59.0387	26.1124	70.1514	70.2428	97.6357	231.262	27.6673
84.328	76.2793	22.5911	59.5418	46.0054	70.2428	233.365	97.8644	360.086	27.8045
108.748	76.3708	167.513	59.5418	75.7306	70.5629	20.7161	98.1845	168.565	27.8959
23.5515	76.9196	342.525	59.6332	116.294	72.0263	38.0482	98.1845	423.698	27.8959
341.245	77.011	46.0969	59.7704	99.5564	72.1635	246.582	98.1845	297.389	27.9874
307.129	78.9317	329.4	60.4107	364.43	72.1635	411.625	99.968	142.635	28.1246
95.6235	79.0232	395.665	60.5936	225.637	72.255	330.772	100.288	92.2394	28.3075
366.626	79.0232	354.049	60.7308	315.087	73.6269	312.343	101.02	206.064	28.3075
323.958	79.6634	312.663	61.5539	390.589	73.8556	393.653	101.248	213.792	28.3075
413.728	80.3951	79.9835	62.1027	255.591	74.7702	89.9072	104.221	319.431	28.4447
245.53	80.4866	384.232	62.4228	270.545	75.7306	215.896	104.77	402.021	28.4447
221.064	80.6238	246.261	62.6058	374.171	75.8677	425.481	105.364	7.86573	28.5362
133.214	81.264	149.952	62.9259	197.146	76.9196	155.257	105.501	255.819	28.5362
381.671	81.3555	98.7333	63.0173	32.4233	77.1025	284.904	105.913	29.9995	28.7191
6.72246	81.9042	114.785	63.6576	166.141	77.1025	202.223	106.142	51.5846	28.7191
148.763	81.9042	159.052	63.9777	155.668	77.5598	190.515	106.325	198.838	28.7191
230.713	82.1786	62.9259	64.6179	288.929	77.5598	363.15	106.462	17.515	29.0392
350.574	82.8189	193.351	64.6179	130.379	77.8799	347.144	106.553	394.384	29.0392
396.396	83.0475	224.997	64.6179	236.841	78.0628	137.239	106.736	110.669	29.1764
283.532	83.139	373.211	65.2582	300.498	79.3433	123.611	106.873	351.946	29.4965
167.101	84.831	204.052	65.4868	333.516	79.8921	107.193	107.605	40.6091	29.6794
57.5296	86.3401	322.175	65.8069	48.6578	80.075	177.482	108.565	329.812	29.8166
192.802	86.4316	70.4715	66.5386	342.525	80.3037	56.3863	108.748	370.558	29.9995
43.4445	86.9804	267.755	66.5386	107.193	80.8067	379.979	109.206	278.776	30.3197
294.005	86.9804	301.002	66.7215	23.0027	81.3555	400.101	110.578	242.054	30.5483
69.191	87.392	13.3992	67.0417	404.948	81.3555	73.0782	110.898	134.815	30.7312
312.846	87.6206	176.43	67.1789	60.182	83.0475	331.916	112.361	289.157	30.7312
179.906	88.7639	36.1732	67.6819	184.022	83.139	11.7986	113.001	386.427	30.9599
206.887	89.1755	133.352	67.6819	423.058	83.4591	29.8166	113.093	155.348	31.5087
334.156	89.3127	254.859	67.9106	321.855	83.6877	271.139	113.55	270.728	31.5087
108.977	89.4041	424.247	68.7337	208.716	83.8707	232.817	113.733	414.917	31.5087
388.348	89.9072	52.2248	68.9624	77.6513	84.0079	41.4323	114.373	310.651	31.8288
365.391	90.3645	289.386	70.5629	93.6114	84.0079	414.597	114.602	59.9534	31.9202
23.3228	90.4559	346.001	70.6544	260.987	84.5109	253.075	114.922	165.729	31.9202
119.907	90.7761	91.4163	70.9745	384.095	84.5109	299.721	115.013	97.9558	32.1489
267.435	91.0962	241.826	71.2946	359.995	84.6481	126.126	118.489	406	32.1489
84.1908	91.4163	335.117	71.2946	369.689	85.3798	85.4713	118.946	173.229	32.2404
253.67	91.5992	360.269	71.2946	278.548	85.6085	221.201	118.946	375.955	32.3318
141.034	92.3766	122.742	71.7062	7.68281	86.1115	155.348	120.181	126.858	32.7434
421.777	92.8797	232.725	71.8434	171.354	86.3401	284.081	120.41	148.351	32.7434
402.113	93.5199	108.245	72.1635	220.561	86.6603	136.278	121.37	346.001	32.8806
92.2394	93.84	153.885	72.5751	147.62	87.392	362.83	122.102	181.186	33.2922
299.95	93.84	380.711	72.5751	122.742	88.2151	318.471	122.33	83.7792	33.9324
281.52	94.0687	217.359	72.6666	34.2525	88.8554	113.23	122.651	187.726	33.9324
373.622	94.5717	405.268	72.9867	290.3	89.084	345.772	122.651	425.939	33.9324
155.348	95.1205	27.9874	73.6269	344.72	89.3127	184.982	123.062	43.353	34.344
348.836	95.5321	62.1942	74.3586	241.505	89.8157	202.131	124.205	261.398	34.344
237.618	96.0809	307.038	74.3586	409.43	90.1358	67.1789	125.303	114.922	34.4355
223.945	97.0412	18.0637	75.0903	60.0905	90.3645	173.869	125.623	219.372	34.4355
5.67065	97.3156	388.439	75.319	231.033	90.7761	391	125.806	76.0507	34.5726
200.759	98.093	326.108	75.7306	303.334	91.7364	266.932	126.355	303.745	34.7556
28.216	98.1845	172.269	75.8677	165.729	92.2394	95.9437	126.995	356.793	34.7556
321.763	98.5046	4.48164	76.2793	198.107	92.4681	48.4291	127.91	337.403	35.0757
188.275	98.9162	278.365	76.3708	111.081	93.0169	238.441	128.55	3.8414	35.3043
129.83	99.1448	40.6091	76.5994	19.1156	93.5199	411.625	129.419	28.6276	35.3043
390.451	99.5564	187.086	76.5994	329.995	93.5199	15.9144	129.602	233.914	35.3043
45.8682	99.6479	253.258	77.4226	392.692	93.5199	33.0635	130.562	250.926	35.3043
335.711	99.968	201.308	78.383	266.52	94.2516	335.94	131.431	14.3595	35.3958
59.9534	100.425	140.303	78.4744	358.714	94.5717	162.437	131.934	138.931	35.3958
166.369	100.425	398.729	78.6116	43.6731	95.029	145.287	132.574	89.1755	35.533
212.192	100.837	421.457	78.7031	382.631	95.7607	304.294	133.123	322.266	35.7159
425.71	101.477	347.922	79.1146	427.402	95.7607	348.562	133.214	227.969	36.036
109.389	101.66	76.1879	79.2518	135.547	96.1723	280.057	133.946	65.8984	36.1732
300.681	102.3	127.727	79.572	214.433	96.2638	212.832	134.083	19.6186	36.2647
75.9592	104.13	316.367	80.1665	184.159	96.401	427.631	134.083	50.8529	36.3562
269.127	104.312	103.352	80.3037	317.831	96.7211	253.075	134.266	364.522	36.6763
356.885	104.77	289.157	80.3037	417.661	96.7211	104.541	135.318	107.193	36.9049
313.715	105.181	165.409	80.7152	282.801	97.9558	125.394	135.638	295.194	36.9049
381.351	105.501	211.643	80.8067	251.383	98.093	379.019	135.638	207.344	36.9964
175.973	105.593	362.83	80.9439	155.897	99.5564	318.791	135.775	312.663	36.9964
246.399	105.684	240.682	82.0872	84.328	99.7851	227.74	136.507	285.041	37.225
97.7729	105.822	269.904	82.1786	100.425	100.105	365.985	137.788	410.664	37.408
408.469	106.553	25.1521	82.8189	69.6026	100.288	154.708	139.983	393.012	37.5452
147.528	106.645	51.4931	83.7792	223.396	100.745	193.259	140.12	36.4476	37.9567
414.689	106.965	373.942	84.1908	4.93895	100.837	1.00608	140.852	243.929	38.1397
292.633	107.056	67.8191	84.328	346.001	100.837	79.0232	140.852	381.991	38.2769
258.152	107.514	116.614	84.4194	400.741	101.157	56.2491	141.263	198.656	38.597
281.2	107.925	90.8675	84.9682	145.699	101.248	407.189	141.812	169.433	38.9171
321.992	109.068	387.799	85.6085	292.633	101.34	34.7556	142.223	275.163	38.9171
9.46632	109.389	334.66	85.7914	126.126	101.797	335.208	142.772	160.653	39.1
223.396	109.389	229.112	85.8828	198.656	101.797	177.162	142.864	370.787	39.2372
193.351	109.526	301.733	85.8828	369.827	103.352	269.127	142.955	351.946	39.5573
368.866	111.858	151.735	86.1115	60.5021	104.541	294.553	145.196	401.473	39.5573
24.7405	112.041	128.687	87.3005	411.945	104.861	208.259	145.699	122.102	39.7402
46.0969	112.361	174.738	87.392	170.897	105.044	90.8675	146.248	217.497	39.8774
389.72	112.681	16.2345	87.4834	238.213	105.044	133.214	146.248	328.532	39.9689
63.4746	113.321	402.021	87.4834	37.8653	105.181	233.274	146.659	429.734	40.1518
210.088	113.321	412.677	87.6206	19.207	105.501	250.286	146.888	418.942	40.3805
88.8554	113.413	141.172	88.0322	327.8	105.501	19.207	147.391	97.4528	40.4719
334.66	113.55	275.804	88.4438	384.415	105.913	323.958	148.031	116.385	40.6091
306.078	114.465	246.902	88.5352	273.289	106.553	284.721	148.9	131.614	40.6091
159.052	114.602	100.197	88.6724	305.437	106.965	352.54	148.9	29.3593	40.7006
123.474	114.785	199.936	88.8554	48.109	107.605	375.726	149.54	266.612	40.9293
142.223	115.745	257.511	89.4041	248.731	109.709	417.341	149.952	341.336	41.1122
237.07	116.202	163.077	89.8157	182.97	110.257	160.745	150.181	44.1762	41.2494
348.242	116.614	44.0847	89.9072	422.875	110.669	224.585	151.095	59.3131	41.2494
401.244	119.038	310.971	90.2273	351.946	110.989	70.8831	151.415	149.083	41.661
169.525	119.129	423.149	90.2273	198.107	111.218	309.69	151.553	202.771	41.9811
251.978	119.129	187.223	90.7761	162.848	111.721	46.9657	152.056	258.334	41.9811
33.0635	119.358	324.919	91.0047	214.616	111.95	186.354	152.924	210.82	42.3926
183.519	119.907	29.2678	91.5078	115.013	112.041	117.346	153.245	175.058	42.4841
198.015	120.181	220.332	92.2394	258.563	112.178	363.15	153.336	137.559	42.6213
76.9196	120.638	367.906	92.5596	339.416	112.59	136.919	154.479	190.195	42.6213
384.232	120.638	77.6513	93.0169	80.075	112.681	28.8563	155.257	76.3708	42.8042
276.352	121.141	3.10971	93.1083	7.36269	113.001	205.104	155.988	18.5668	42.9414
0.777427	121.462	352.129	93.1998	93.1083	113.23	95.029	157.681	156.72	43.0329
412.494	121.69	127.818	95.4406	148.26	113.321	341.336	157.681	227.969	43.0329
321.855	122.742	93.7486	95.7607	316.367	113.321	2.37801	158.641	71.066	43.1243
286.413	123.154	61.6454	95.8522	364.751	113.642	57.8497	159.601	391.32	43.1243
228.792	123.794	290.941	96.2638	132.163	114.922	299.401	159.693	84.1908	43.353
17.1949	124.114	16.8747	96.401	283.852	115.013	379.247	160.333	322.724	43.353
109.617	124.205	204.875	96.7211	392.555	115.242	247.542	160.836	182.787	43.5817
426.259	124.526	163.808	97.1327	228.929	116.065	272.831	161.385	3.65848	43.6731
52.0419	124.846	401.701	97.2241	292.541	116.065	409.841	161.796	290.3	43.6731
330.955	124.983	239.082	97.8644	67.9106	116.294	322.724	162.116	359.674	43.6731
127.178	125.074	338.913	97.8644	405.588	117.117	235.378	163.305	335.528	43.7646
219.097	125.074	52.6821	98.093	23.3228	117.666	395.024	164.449	250.926	43.9932
362.921	125.806	278.456	98.093	102.758	117.986	258.334	164.997	237.938	44.0847
38.1397	126.538	300.819	98.1845	193.259	119.77	44.8164	165.409	300.041	44.0847
262.267	126.538	385.787	98.5961	266.932	119.77	28.9477	165.729	89.8157	44.4048
295.285	127.818	35.0757	99.4649	40.7921	120.09	149.083	166.69	316.687	44.4963
151.324	128.047	116.385	99.7851	245.347	120.638	10.6553	167.01	309.142	44.8164
178.534	128.367	373.714	100.197	373.119	120.959	422.097	167.101	374.171	44.8164
165.318	128.687	254.63	100.288	333.105	121.69	360.589	167.33	10.3352	44.9536
389.72	128.779	191.43	100.517	175.47	122.102	80.6238	167.421	415.009	45.045
244.249	129.19	358.485	100.745	307.77	122.193	107.605	168.244	383.592	45.2737
101.157	129.327	139.571	100.837	140.12	123.474	214.296	168.382	400.512	45.2737
191.659	129.922	177.482	100.928	56.3863	123.611	346.001	168.473	423.469	45.2737
205.744	130.471	79.9835	101.66	212.741	123.885	181.049	168.565	50.4413	46.0054
87.4834	130.699	419.353	101.66	415.649	123.885	280.88	170.165	275.301	46.0054
134.906	130.699	406.549	102.209	85.2883	124.663	122.01	170.257	367.403	46.1883
310.651	130.699	149.952	103.032	160.836	125.166	331.824	171.217	129.099	46.417
352.129	130.791	289.98	103.809	8.00293	126.126	132.163	171.949	162.757	46.6456
376.366	131.522	44.6335	103.901	353.089	126.218	163.305	172.086	242.786	47.0572
268.944	133.443	12.0273	103.992	276.856	127.315	230.21	172.269	407.28	47.0572
66.127	133.626	264.051	103.992	319.751	127.407	383.683	173.641	36.5848	47.1487
7.04258	134.906	28.6276	104.541	252.938	127.727	93.6114	174.51	107.056	47.1487
419.673	136.278	310.011	104.861	359.857	128.367	370.878	174.601	283.761	47.1487
218.777	137.056	320.483	105.044	400.421	128.367	315.407	174.83	170.394	47.3773
403.485	137.056	207.436	105.273	118.946	128.55	247.679	175.058	194.723	47.606
232.222	137.147	67.2703	106.004	426.762	128.779	59.7704	175.241	353.409	47.606
137.879	137.33	217.268	106.462	24.2832	128.87	190.195	176.293	61.4625	47.6974
321.672	137.559	340.696	106.873	340.056	128.87	201.079	176.522	112.91	47.7889
164.769	137.65	231.582	107.285	226.78	129.327	408.241	176.522	326.519	48.0176
75.8677	137.97	330.544	107.285	385.284	131.019	74.7702	178.625	97.2241	48.4291
25.2435	138.839	2.28655	107.834	370.878	131.202	300.361	179.266	266.292	48.4291
254.219	139.159	167.924	108.154	75.6391	131.339	44.6335	179.586	19.7558	48.6578
339.964	139.251	391	108.337	187.863	131.843	30.8684	181.186	151.324	49.0694
113.733	139.342	82.6359	108.977	289.066	132.071	364.522	182.147	234.737	49.298
291.672	139.663	123.794	109.068	149.861	132.391	147.528	182.238	120.09	49.3895
310.102	140.12	139.159	110.166	243.838	132.391	11.2956	182.467	225.088	49.3895
186.674	140.303	96.8125	110.257	132.574	132.483	101.157	182.65	47.1487	49.5724
89.587	140.943	59.1302	110.349	299.95	132.894	176.202	182.787	335.62	49.7096
241.002	141.675	21.4478	110.486	108.245	133.214	114.053	183.61	343.897	49.8925
42.6213	141.903	280.88	110.761	176.522	133.626	281.429	183.61	218.96	50.1212
200.988	142.452	363.241	110.761	414.277	133.763	133.123	183.93	69.191	50.5328
352.037	142.635	239.402	111.218	202.543	133.946	337.129	184.159	143.504	50.5328
396.168	142.635	38.2769	111.629	216.765	134.495	219.28	184.25	292.861	50.5328
370.65	143.184	176.522	111.629	327.48	134.724	350.848	185.394	80.7152	50.7614
64.6179	143.915	250.835	112.041	42.4841	134.906	235.378	186.171	360.177	50.7614
99.2363	144.464	348.745	112.59	261.216	135.044	161.613	186.583	180.775	50.8529
10.5181	144.784	430.695	112.59	84.0993	136.187	323.227	187.086	319.202	50.8529
124.754	145.516	110.989	112.681	97.3156	136.187	379.659	187.634	26.6154	50.9901
224.997	146.568	407.509	112.773	59.0387	136.599	248.822	188.503	301.002	50.9901
329.4	146.888	302.602	112.91	10.8382	136.736	86.3401	189.967	9.78644	51.5846
276.444	148.031	378.516	113.23	271.048	137.97	43.0329	190.378	136.827	51.5846
177.345	148.351	190.698	113.55	398.409	138.611	428.042	190.607	174.098	51.5846
290.209	148.58	267.023	113.55	19.5271	138.931	59.1302	191.11	259.615	51.9047
144.236	148.9	223.076	113.962	345.132	139.342	413.134	192.39	376.824	51.9047
383.043	148.992	199.707	114.053	360.406	140.623	310.559	192.802	208.716	52.0419
410.664	149.723	398.088	114.693	388.576	140.943	292.633	193.122	309.37	52.0419
213.655	150.501	51.7218	115.974	72.8952	141.263	175.47	193.259	157.589	52.1334
248.091	150.775	421.366	115.974	284.081	141.263	274.843	193.899	250.606	52.6821
265.24	151.004	150.912	116.065	161.796	142.132	191.43	194.403	394.567	52.6821
300.819	151.004	72.0263	116.202	411.533	142.132	20.4875	195.454	401.061	52.7736
426.259	151.095	0.868889	116.706	301.413	142.772	124.663	195.774	199.707	52.865
35.7159	151.232	325.696	116.797	313.395	142.955	142.315	195.774	384.735	53.0022
197.146	151.644	165.409	117.574	255.088	143.275	205.927	196.003	410.985	53.0937
238.35	151.964	315.178	117.757	332.236	143.687	360.498	197.146	88.8554	53.4138
320.803	152.376	260.575	118.398	238.03	143.824	232.222	197.467	429.414	53.5053
167.924	152.696	16.3717	119.358	115.425	144.144	2.37801	197.604	106.004	53.5967
394.384	153.748	96.7211	119.449	39.0086	144.647	159.693	197.604	16.2345	53.8254
20.8991	154.708	208.716	119.449	185.073	144.647	80.7152	197.695	187.086	54.0541
359.354	154.799	340.284	119.449	419.994	144.647	104.541	197.695	279.416	54.0541
83.2762	154.937	355.833	119.678	375.131	145.059	402.204	198.335	37.6366	54.1455
338.044	155.12	26.7069	120.41	145.379	145.287	333.196	198.747	63.246	54.237
51.5846	156.217	117.117	120.41	203.412	145.836	303.105	199.707	367.906	54.237
10.1066	156.72	65.5783	120.501	219.92	147.528	388.851	201.491	422.006	54.237
105.913	157.269	289.98	120.638	55.1973	148.168	249.554	203.732	272.237	54.3742
66.6301	157.452	388.348	120.638	87.1633	148.992	33.6123	204.372	55.6089	54.4656
118.077	158.184	406.777	120.821	7.86573	149.312	377.006	204.463	166.552	54.5571
208.076	158.641	272.831	120.959	348.333	149.952	414.369	205.012	295.102	55.1059
131.522	158.732	38.3683	121.141	170.257	150.043	219.189	205.104	150.364	55.426
281.657	158.732	236.978	121.141	387.616	150.043	281.52	205.195	228.061	55.426
154.068	159.281	189.738	122.193	29.1764	150.501	321.855	205.652	350.025	55.8376
91.7364	159.373	430.375	123.062	102.209	151.095	65.0295	206.155	99.4649	55.929
311.611	159.784	156.4	123.154	126.766	151.095	18.3839	207.024	114.282	56.0662
259.844	160.013	303.334	123.611	405.817	151.095	194.082	207.939	287.877	56.2491
226.048	160.104	80.075	124.022	315.956	151.873	171.949	208.716	130.791	56.3863
189.555	162.025	131.614	124.434	267.984	152.787	356.382	209.128	211.049	56.3863
348.104	162.116	246.399	125.897	295.194	153.428	151.553	209.86	180.958	56.4778
297.206	162.528	182.558	126.446	230.301	154.388	105.913	210.271	241.414	56.5693
143.047	164.129	141.492	126.675	44.4048	154.708	45.6853	210.728	123.702	57.2095
243.929	164.129	368.638	126.766	279.188	155.12	207.116	211.78	375.635	57.2095
399.689	164.22	324.599	127.315	194.494	155.44	137.239	212.924	6.40234	57.5296
429.734	164.22	377.144	127.407	332.876	155.44	123.291	213.061	171.217	57.5296
385.604	164.769	109.389	127.635	245.758	155.76	261.536	213.244	341.565	57.7583
179.906	164.997	197.146	128.138	419.033	155.76	88.5352	213.564	156.309	57.8497
369.827	165.089	211.14	128.138	62.9259	155.897	241.643	213.564	25.335	58.0784
272.42	165.501	279.965	128.23	148.031	156.217	344.629	214.433	221.841	58.2613
39.7402	166.141	41.3408	128.367	215.347	156.217	333.288	214.616	203.412	58.3985
95.8522	167.33	221.064	128.458	257.511	156.492	58.7186	215.896	305.254	58.3985
164.037	167.65	260.164	128.687	158.184	157.452	316.87	216.765	51.173	58.49
203.503	167.741	57.301	129.19	362.601	158.001	377.555	216.765	332.464	58.49
326.199	167.833	72.3465	129.19	372.342	158.641	404.948	217.588	74.6787	58.5814
413.134	168.244	169.342	129.602	6.95111	159.144	222.984	218.228	138.931	58.5814
73.3068	169.342	6.31088	129.83	109.068	159.144	247.771	218.777	322.724	58.5814
21.9509	170.074	393.835	129.83	305.895	159.144	74.7702	218.869	408.012	58.5814
117.986	170.165	91.7364	130.471	75.0903	159.281	390.589	219.097	386.427	58.7186
262.587	170.165	343.577	130.791	20.2588	159.784	424.658	219.28	397.22	58.7186
376.824	170.257	18.5668	131.431	85.6085	159.921	13.0791	219.692	357.205	58.8101
3.74994	170.577	417.57	132.483	393.332	160.013	29.6794	219.692	251.246	58.9015
49.3895	170.714	403.988	133.352	181.598	160.333	367.266	220.241	313.943	59.1302
286.916	172.086	430.695	133.855	429.186	160.516	292.221	220.972	188.686	59.5418
222.573	172.817	236.018	133.946	269.264	162.985	207.024	221.612	261.719	59.6332
305.895	173.458	100.608	134.083	290.3	163.397	280.148	222.161	43.2615	60.182
196.643	173.778	332.464	134.175	98.4131	163.9	189.555	222.801	347.693	60.182
353.501	173.961	117.117	134.495	128.047	163.9	165.318	222.893	89.1755	60.5021
129.51	174.738	49.7096	135.044	355.01	163.9	181.186	223.945	80.4866	60.5936
140.852	174.921	291.078	135.135	35.2129	164.037	263.639	223.945	11.2956	60.8222
233.457	175.058	248.502	135.318	225.408	164.449	232.314	225.728	418.302	61.1424
425.161	175.561	33.5208	135.638	338.181	164.769	101.98	225.957	228.701	61.5539
337.952	175.653	179.586	135.638	410.344	165.089	129.19	226.048	267.023	61.7826
85.4713	175.79	314.126	135.958	209.768	165.318	145.287	227.329	367.266	61.7826
253.075	175.881	355.513	135.958	253.487	166.049	308.09	228.289	32.5605	61.8741
62.9259	176.202	274.249	136.187	199.616	166.141	52.5449	228.792	195.912	61.8741
396.717	176.842	128.779	136.507	321.123	166.141	20.396	230.53	280.468	61.8741
177.665	177.665	149.083	137.879	238.99	166.461	406.777	230.713	105.044	62.1942
101.889	178.305	369.095	137.97	115.745	166.781	86.8432	230.804	95.1205	62.2856
360.589	178.305	210.18	138.199	56.4778	166.872	350.025	230.804	112.178	62.2856
241.002	179.083	222.893	138.519	377.327	167.33	334.568	231.262	243.655	62.2856
271.368	179.357	305.895	138.611	297.526	167.924	324.507	231.445	292.221	62.6058
35.3958	179.814	81.3555	138.931	169.616	168.153	5.85357	233.045	119.449	62.7429
207.116	179.814	69.0538	139.068	391.732	169.342	164.357	233.594	235.926	62.9259
156.812	180.317	379.156	139.159	187.954	169.936	117.254	234.646	128.779	63.1545
377.875	180.637	60.7308	139.663	17.7436	170.257	366.534	234.966	423.698	63.1545
320.574	181.278	195.271	140.943	403.165	170.714	415.878	235.698	59.0387	63.6576
4.93895	183.519	11.7071	141.034	138.428	170.897	239.173	236.978	402.844	63.6576
192.299	184.342	135.638	141.263	70.7459	171.217	208.579	237.161	430.878	63.7948
289.386	184.479	418.622	141.355	361.229	171.537	66.4472	237.298	164.357	63.8862
167.513	185.073	107.285	141.903	422.006	172.406	194.082	238.213	146.888	64.1149
341.336	185.073	171.537	141.903	88.2151	172.909	296.154	238.213	19.0241	64.2978
117.254	186.034	319.111	142.223	310.422	173.138	382.723	238.35	66.2185	64.435
406.137	186.034	264.6	142.315	266.52	173.641	266.2	239.173	36.6763	64.5265
29.9995	186.583	280.788	142.452	215.485	173.869	251.978	239.402	210.18	64.5265
73.3983	186.583	430.695	142.544	276.535	174.51	34.4355	240.545	300.27	64.7551
417.753	186.674	46.417	143.184	343.669	174.51	103.581	240.774	308.547	64.7551
51.9047	187.086	326.931	143.184	5.25907	174.738	223.945	240.865	378.836	64.938
142.132	187.086	391.732	143.275	155.668	174.738	178.763	241.643	250.514	65.2582
183.198	187.634	360.086	143.687	34.1611	175.241	130.379	242.374	326.611	65.2582
229.753	187.954	95.5321	144.236	104.861	175.653	281.017	242.466	392.372	65.3496
219.692	188.275	227.969	144.327	243.426	176.11	313.715	242.786	414.186	65.4868
153.885	188.503	28.5362	145.059	51.0815	177.482	48.5206	244.387	332.876	65.5783
130.379	188.778	0.548772	145.836	329.08	177.985	428.682	244.478	215.896	65.8069
388.439	188.915	64.8466	146.659	124.114	178.122	19.9387	244.569	135.638	66.127
90.2273	189.098	161.705	146.659	185.211	178.442	91.5992	245.118	156.217	66.127
204.875	189.326	239.813	146.751	370.558	178.442	159.052	245.118	358.394	66.31
302.053	189.646	187.406	147.62	386.839	178.763	409.521	246.17	181.186	66.4472
260.575	189.738	336.992	147.62	19.9387	180.775	373.302	246.902	339.644	66.4472
270.728	190.195	210.82	147.711	201.171	181.049	396.808	247.039	264.188	66.5386
316.779	191.11	74.2672	147.94	136.736	181.278	326.611	247.542	26.2953	66.6301
102.437	191.659	246.81	147.94	227.1	181.369	74.6787	247.679	172.589	66.6301
247.359	191.979	292.77	147.94	412.357	181.506	350.345	247.862	187.863	66.8587
11.7986	192.299	124.343	148.26	169.845	182.33	63.9777	249.463	287.465	66.8587
283.761	193.351	403.073	148.489	255.911	182.467	188.366	249.463	318.882	66.9502
45.8682	194.403	112.773	148.58	353.821	182.558	236.749	250.926	349.065	67.1789
71.7062	196.003	38.2769	148.672	401.793	182.787	106.736	251.155	369.095	67.2703
167.513	196.735	344.72	149.083	312.846	183.93	6.40234	251.475	49.0694	67.8191
346.001	196.735	140.44	149.403	422.417	184.479	143.275	251.886	198.427	67.8191
376.366	197.055	18.704	149.632	83.4591	184.89	301.413	252.755	75.0903	68.002
428.774	197.284	379.567	149.723	299.127	185.073	259.295	253.487	276.261	68.2307
190.195	198.656	154.708	150.181	267.892	185.302	172.726	253.578	420.862	68.5508
126.675	199.296	201.491	151.095	69.2825	185.851	224.036	253.99	148.58	68.6422
117.437	199.387	371.61	151.232	39.0086	185.942	208.396	255.819	5.67065	68.8709
89.8157	199.616	85.2883	151.415	177.894	186.171	123.702	256.002	163.488	68.8709
179.174	199.936	257.603	151.415	283.532	187.223	359.354	257.1	363.79	68.9624
406.137	199.936	11.4785	153.336	99.4649	187.314	34.9842	257.374	55.5174	69.0538
361.046	200.027	54.237	153.336	210.18	187.406	155.577	258.243	82.9561	69.5111
327.48	200.53	323.227	154.296	363.882	187.863	285.865	258.563	119.038	69.6026
58.9015	200.759	103.261	154.479	342.617	188.686	420.085	258.883	407.829	69.6026
217.359	200.759	355.101	154.799	124.526	189.738	55.6089	258.975	88.8554	70.0142
292.541	200.759	422.234	154.799	194.22	190.195	316.047	259.203	95.1205	70.0142
230.804	201.628	226.78	154.937	332.144	190.515	83.5963	260.164	389.948	70.0142
24.2832	202.223	238.762	154.937	53.8254	190.79	19.5271	260.255	65.5783	70.2428
137.788	203.183	304.706	154.937	397.448	191.11	398.409	260.484	111.218	70.6544
383.912	203.412	314.538	155.028	113.093	191.339	100.837	260.667	209.128	70.6544
150.912	203.823	410.573	155.257	151.415	191.567	338.364	260.804	397.86	70.7459
254.95	205.012	274.752	155.76	7.77427	191.659	382.403	261.078	230.21	70.8831
7.36269	205.744	135.318	156.309	238.213	191.75	246.49	263.228	261.398	70.8831
74.7702	205.744	287.877	156.309	222.984	193.122	225.865	264.691	379.75	70.8831
310.011	205.835	69.9227	156.812	75.9592	193.579	193.442	266.703	40.9293	71.066
102.62	205.927	265.88	156.949	297.938	193.762	407.6	267.252	294.233	71.2032
272.511	206.476	218.869	158.092	267.023	194.082	132.894	267.984	222.024	71.2946
417.57	206.567	345.269	158.504	133.855	194.403	294.462	268.075	236.338	71.3861
86.9804	206.704	36.1732	158.824	27.5758	194.494	68.4593	269.036	105.822	71.7062
35.8531	207.024	121.279	158.824	372.159	194.631	348.333	269.036	245.118	71.7062
201.171	207.024	88.6724	158.961	164.037	195.043	147.071	269.584	159.464	72.3465
214.296	209.448	184.982	158.961	383.455	195.043	175.79	269.904	299.127	72.3465
178.763	209.951	387.936	158.961	62.9259	195.774	389.491	270.087	309.599	72.3465
340.193	210.088	162.985	159.784	252.207	196.415	163.717	270.956	128.047	72.4379
352.266	210.82	401.473	160.013	317.327	196.643	209.448	270.956	429.323	72.5751
370.147	212.283	172.589	160.104	16.0516	196.826	313.166	272.1	341.016	72.9867
231.125	212.421	329.904	160.836	411.625	198.015	118.809	273.151	251.658	73.0782
287.465	213.061	199.799	161.065	99.3278	199.387	23.5515	273.289	270.545	73.0782
245.347	213.472	250.606	161.065	423.698	199.616	263.959	273.471	321.672	73.0782
298.898	213.472	151.735	161.613	280.56	199.799	89.3127	273.609	277.176	73.3068
324.416	213.884	45.7767	161.934	396.808	200.119	108.017	273.7	138.611	73.6269
161.156	214.113	79.4348	162.025	350.345	200.348	279.096	275.072	15.5943	73.7184
115.562	214.296	362.281	162.025	183.198	200.851	42.164	275.163	33.2007	73.7184
66.2185	214.616	23.963	162.665	209.951	201.811	427.493	275.301	357.845	73.7184
193.579	214.616	0.731696	163.488	45.045	202.04	327.891	276.032	168.565	74.0385
401.473	215.073	110.989	163.488	304.934	203	360.498	276.032	177.07	74.0385
145.059	215.256	380.07	163.488	89.1755	203.183	373.622	276.261	187.314	74.3586
312.251	217.177	63.4746	164.129	191.43	203.412	57.2095	276.535	286.733	74.3586
21.8594	217.359	280.697	164.54	173.458	203.732	193.762	277.176	417.021	74.4501
124.114	217.588	414.826	164.54	340.513	203.915	227.649	278.045	331.504	74.7702
260.164	217.817	189.418	165.638	373.622	204.372	252.527	279.325	386.747	74.9989
48.3377	218.137	233.045	165.638	0.777427	204.692	417.57	279.416	20.9905	75.0903
96.8125	218.137	206.796	166.141	115.562	204.783	132.254	281.429	1.3262	75.2275
210.591	218.137	263.091	166.232	141.903	205.104	213.244	281.84	71.2946	75.4104
379.567	218.137	139.663	166.461	160.516	205.515	393.195	282.801	370.147	76.0507
6.95111	218.457	311.611	166.69	246.902	206.064	177.253	284.172	422.875	76.0507
361.458	218.548	336.58	167.101	123.702	206.476	203.183	284.401	346.412	76.1879
275.941	219.92	221.201	167.193	330.544	206.704	97.8644	284.904	78.1543	76.3708
160.973	220.652	53.0937	167.65	233.685	207.116	156.217	285.041	201.811	76.3708
176.522	222.344	302.191	168.061	382.951	207.436	301.733	285.544	193.579	76.4622
85.2883	222.664	31.0514	168.793	392.372	208.259	19.4357	285.865	95.212	76.6909
241.414	223.213	430.969	169.205	52.1334	208.579	345.361	285.865	48.7493	76.9196
333.196	223.305	321.763	169.342	69.6026	209.128	33.8409	287.054	58.8101	76.9196
255.088	225.225	172.497	171.034	263.959	209.219	403.393	287.374	88.2151	77.011
404.948	225.408	102.62	171.766	15.7315	210.088	72.0263	287.785	103.261	77.1025
387.479	225.865	366.626	172.177	219.28	210.088	54.4656	288.425	145.287	77.2397
70.0142	225.957	115.974	172.269	290.438	210.18	268.395	289.157	215.667	77.3311
29.9995	226.277	255.088	172.269	316.55	210.408	317.51	289.249	136.919	77.4226
303.334	226.506	148.763	172.406	409.613	210.408	358.577	289.386	403.165	77.4226
136.599	226.597	42.3012	173.046	27.5758	210.5	147.94	289.477	9.1462	77.5598
421.366	226.917	379.019	173.046	279.416	211.049	119.038	290.118	304.294	77.6513
285.453	227.237	416.93	173.458	361.458	211.369	84.4194	292.13	352.769	77.7427
199.067	227.329	393.332	173.549	425.619	212.192	1.96643	293.502	364.293	78.0628
295.102	227.329	80.9439	173.961	201.491	212.283	184.479	293.593	379.156	78.1543
222.664	227.74	211.14	174.281	99.4649	213.564	281.109	294.005	115.562	78.4744
103.901	228.061	295.285	174.51	38.2769	214.524	332.236	294.005	261.536	78.7945
43.6731	228.609	10.4267	174.601	184.479	214.616	376.183	294.233	394.476	78.7945
1.23474	229.112	193.259	174.601	80.075	214.844	233.777	295.834	124.022	78.9317
120.638	230.53	126.126	174.921	6.4938	215.256	250.423	295.834	241.734	79.3433
16.7833	231.765	71.3861	175.058	134.083	216.536	111.081	296.017	321.123	79.3433
153.107	231.765	180.637	175.15	169.022	216.856	217.497	296.017	292.541	79.4348
317.327	231.765	285.362	175.241	386.107	216.948	50.1212	296.154	249.371	79.572
210.088	231.902	164.997	175.79	151.553	217.497	196.735	296.474	312.983	79.6634
246.261	231.993	271.276	177.162	107.193	217.68	20.0759	296.794	181.598	79.7549
267.755	232.314	345.589	177.482	308.639	217.908	298.578	298.258	233.594	79.7549
346.733	232.405	97.9558	177.574	371.519	218.137	388.668	298.669	410.664	79.9835
55.0144	233.137	139.251	178.214	352.129	218.64	317.19	299.127	162.665	80.3037
361.229	233.685	231.765	178.214	325.879	218.96	416.289	301.093	226.369	80.3951
331.184	233.777	404.765	178.442	226.917	219.189	362.921	302.191	28.9477	80.9439
189.555	234.737	54.7858	178.763	252.527	219.28	136.599	302.511	63.9777	81.0354
140.76	235.057	25.9752	178.945	413.546	219.692	38.7799	303.242	151.004	81.264
232.405	236.109	223.076	179.357	236.841	219.829	400.512	305.758	428.591	81.264
162.116	236.429	316.047	179.357	268.807	220.241	70.2428	305.986	36.3562	81.3555
374.171	236.521	425.298	179.357	430.375	220.881	98.7333	306.078	275.621	81.3555
181.506	236.749	333.928	179.494	119.449	221.521	272.328	306.078	207.527	81.4469
392.372	237.161	355.97	179.677	337.22	222.024	59.7704	306.215	44.1762	82.3158
307.907	237.298	87.1633	180.317	296.657	222.664	172.086	306.535	372.25	82.3158
96.0809	238.121	110.761	180.775	198.427	222.801	88.3523	306.626	170.485	82.4073
291.81	238.35	38.4598	181.049	26.7069	223.533	340.833	307.267	267.023	82.6359
255.27	239.173	65.0295	181.506	396.305	223.716	247.45	308.318	387.479	82.7274
38.7799	239.63	307.907	181.506	54.1455	224.265	380.391	308.547	18.8869	82.8189
126.858	239.63	244.569	182.009	66.2185	224.814	207.847	309.05	258.472	82.9561
218.228	240.042	382.311	182.33	218.777	225.225	126.995	309.69	88.6724	83.0475
81.9042	240.454	151.644	182.558	317.007	225.408	110.029	310.239	56.2491	83.139
150.364	240.454	208.899	182.558	280.788	225.637	423.149	310.422	331.275	83.2762
422.326	242.054	392.692	184.022	88.8554	225.728	9.2834	310.834	187.954	83.4591
238.35	242.786	263.548	184.159	168.244	225.865	284.904	311.703	357.342	83.4591
406.229	243.335	185.302	184.342	156.629	227.1	303.654	312.023	280.88	83.6877
15.5943	243.655	291.901	184.57	110.486	228.198	350.254	312.114	82.0872	83.8707
68.3221	243.746	413.454	184.982	359.995	228.381	224.997	312.754	215.988	84.0993
5.57918	244.707	47.4688	185.394	188.183	228.701	150.364	313.303	296.566	84.0993
107.285	245.347	122.33	185.394	11.8901	228.792	323.364	313.623	12.0273	84.1908
341.565	245.667	372.022	185.622	416.381	228.929	45.5938	314.264	196.323	84.1908
277.816	245.941	14.1309	185.942	139.251	229.57	189.098	316.138	306.626	84.1908
201.079	246.079	4.71029	186.491	247.45	229.661	368.775	316.138	177.802	84.328
52.2248	246.17	332.007	186.994	387.936	229.981	274.752	318.151	155.897	84.4194
192.939	247.359	424.658	187.406	342.525	230.073	332.967	318.242	143.687	84.5109
28.4447	247.954	200.759	187.634	40.0604	230.393	409.704	318.379	339.644	84.6481
306.398	247.954	159.464	188.275	376.366	230.942	31.5087	319.02	112.27	84.7396
354.278	248.182	319.98	188.366	302.373	231.445	392.281	319.02	225.637	84.7396
164.677	248.274	77.2397	188.686	95.6235	233.137	160.104	319.202	417.433	84.7396
221.292	249.463	27.4843	189.098	429.094	233.137	121.599	319.66	129.19	84.831
318.471	249.463	224.265	189.326	353.638	233.274	94.5717	320.163	72.8952	85.4713
329.172	250.103	256.551	189.418	73.8556	234.234	78.0628	320.254	347.144	85.4713
253.167	250.423	275.163	189.555	400.192	234.509	17.4235	320.391	100.197	85.6085
269.584	250.514	168.702	189.646	128.138	234.737	261.216	321.535	122.971	85.6085
75.319	252.207	282.892	190.287	287.465	234.737	175.881	321.992	410.253	85.6085
368.775	252.207	143.367	190.378	228.381	234.829	228.929	323.044	401.473	86.1115
384.644	252.207	132.254	190.515	26.2039	234.966	201.171	323.364	290.118	86.203
180.317	252.435	63.1545	190.698	171.034	234.966			427.814	86.3401
411.853	252.847	355.101	191.11	155.257	235.698			38.4598	86.5231
147.071	253.396	364.751	192.207	203.183	235.789			3.9786	86.6603
114.373	253.487	402.524	192.207	260.484	235.789			243.929	86.7517
289.66	253.807	94.3888	192.482	216.536	236.018			107.514	86.8432
158.001	254.31	342.525	192.71	408.881	236.109			237.618	86.8432
427.311	255.591	213.061	193.031	370.65	236.978			203.503	86.9804
129.51	256.139	378.195	193.259	9.69497	238.121			138.428	87.1633
304.843	256.231	243.106	193.762	48.6578	238.853			380.528	87.1633
393.195	256.963	84.1908	194.403	310.422	239.813			364.751	87.392
60.182	257.694	37.0878	194.631	323.958	239.951			316.687	87.4834
277.176	258.014	235.149	194.631	184.89	240.362			273.289	87.8035
24.2832	258.243	120.318	195.271	275.484	240.545			254.447	88.2151
242.557	258.334	5.44199	195.774	334.477	241.185			28.6276	88.7639
201.719	258.563	307.678	195.912	59.2217	241.505			160.333	88.8554
228.198	259.203	180.775	196.095	384.872	242.054			19.8473	88.9925
44.7249	259.386	111.218	196.415	244.569	242.374			394.796	89.084
211.14	259.386	419.353	196.826	111.95	242.877			212.512	89.1755
139.983	259.615	391.092	196.963	297.526	243.106			63.4746	89.3127
92.7882	259.706	200.027	197.604	1.41766	243.198			341.108	89.3127
10.0151	260.667	69.6026	197.787	80.4866	243.518			48.0176	89.4041
372.571	260.667	170.165	198.656	141.355	243.518			285.544	89.587
314.035	261.536	53.4138	198.976	227.649	245.027			53.3224	89.9072
169.022	262.359	317.099	199.296	357.982	245.53			328.532	90.0444
355.101	262.496	13.9022	199.616	210.271	246.399			299.218	90.1358
186.583	262.587	30.3197	199.799	169.754	246.719			195.271	90.2273
341.976	263.548	149.312	200.119	96.904	247.679			97.1327	90.7761
75.8677	264.828	330.224	200.119	134.724	248.914			168.565	90.7761
262.999	265.423	271.048	200.53	197.375	248.914			78.0628	91.0047
429.826	265.56	410.664	200.759	123.382	249.051			113.87	91.0047
381.122	265.743	101.02	201.308	262.176	249.051			349.385	91.1876
99.4649	266.52	222.344	201.399	287.877	249.051			374.263	91.4163
151.232	266.52	294.965	201.811	344.72	249.234			384.735	91.4163
326.748	267.252	365.802	201.811	371.61	249.463			357.205	91.5078
416.701	267.252	157.681	201.948	87.6206	249.554			398.912	91.5078
116.294	267.572	345.909	201.948	399.46	250.286			418.85	91.5992
230.301	268.715	133.443	202.223	408.881	250.514			217.085	91.9193
21.2192	269.036	259.386	202.68	39.2372	250.835			183.701	92.148
286.413	269.767	354.873	203.732	417.753	250.835			88.6724	92.2394
363.15	270.316	285.682	203.823	26.7069	250.926			225.637	92.4681
275.941	270.636	93.9315	204.692	155.897	250.926			236.246	92.4681
303.014	270.636	42.7128	204.783	312.251	252.115			429.734	92.4681
33.2922	271.596	60.5936	204.783	429.323	252.527			263.319	92.7882
63.8862	271.917	23.963	204.875	233.777	252.938			309.05	93.1998
199.799	272.237	83.139	205.195	15.0912	253.075			38.3683	93.4285
218.32	272.511	423.789	205.195	272.648	253.167			6.81392	93.5199
52.6821	272.74	120.181	205.515	49.0694	254.219			146.751	93.5199
136.416	273.151	187.726	205.835	182.787	256.139			175.881	93.5199
175.973	273.38	239.493	205.927	76.1879	256.46			151.735	93.6114
389.491	273.7	400.832	207.436	219.372	256.46			406.96	93.6114
368.866	274.432	177.574	207.756	384.735	256.551			72.758	93.84
402.753	274.432	210.5	208.396	65.8984	256.963			137.788	93.84
76.9196	274.752	310.971	208.488	321.535	256.963			272.74	94.1601
345.132	276.261	371.107	208.488	245.758	257.603			319.66	94.2516
249.783	276.352	147.848	208.899	339.416	257.831			124.983	94.3888
311.062	277.176	168.702	209.036	145.516	257.923			414.506	94.3888
324.919	278.456	7.86573	209.357	3.33836	258.152			191.018	94.8004
121.37	278.685	325.056	209.357	171.766	259.386			203.183	94.8004
149.861	279.416	385.787	210.088	106.965	259.615			64.7551	94.8918
296.017	279.508	273.471	210.408	348.562	259.706			249.783	95.029
232.222	279.737	221.841	211.049	303.745	259.844			286.413	95.029
11.8901	279.828	54.3742	211.46	363.47	259.935			277.404	95.7607
430.603	279.828	133.214	211.643	256.551	260.575			161.613	95.9437
98.5046	280.88	109.389	211.872	158.504	262.359			244.707	96.0809
263.228	280.88	253.258	212.512	130.791	262.496			131.431	96.1723
164.449	281.109	70.3343	212.603	292.13	262.999			98.093	96.401
412.585	281.109	336.809	212.832	16.2345	263.319			24.6033	96.4924
284.264	282.252	18.1552	212.924	197.375	263.731			257.694	96.4924
41.9811	282.709	414.689	213.564	28.4447	263.868			33.0635	96.5839
133.352	283.349	294.874	213.655	283.121	263.959			57.8497	96.8125
26.2953	283.852	29.9081	214.113	213.655	264.051			81.9957	96.8125
372.25	284.401	264.28	215.073	235.286	264.188			314.675	96.8125
355.421	284.813	285.362	215.164	398.729	264.508			388.759	96.8125
189.646	285.224	235.606	215.347	117.574	264.828			106.004	96.904
254.31	285.224	359.126	215.485	412.905	265.011			306.626	96.904
391.412	285.956	90.0444	216.445	388.348	265.24			364.522	97.0412
209.357	286.413	200.759	216.536	425.619	265.24			181.049	97.2241
272.74	287.694	214.204	216.856	91.3248	265.56			344.08	97.3156
158.184	287.785	158.412	217.085	372.982	265.743			395.985	97.5442
108.657	287.968	183.93	218.457	182.878	266.383			333.928	97.7729
226.689	288.105	173.778	218.64	271.276	266.703			327.16	97.8644
338.181	288.105	143.824	219.189	55.8376	267.892			49.5724	98.5046
87.1633	288.837	301.23	219.372	5.57918	269.264			140.623	98.5046
322.175	289.569	406.457	219.372	309.279	269.264			169.433	98.5046
173.961	290.941	45.7767	219.692	41.0207	269.676			228.701	98.5046
238.853	290.941	129.099	220.469	143.687	269.767			297.114	98.5046
70.0142	292.633	391.64	220.972	79.0232	269.904			10.6553	98.5961
410.253	292.77	111.218	221.064	324.599	269.904			210.591	98.9162
[truncated: 1,585 more rows]

## Sheet: DN6
Red		Green		Blue		Violet		Double
[truncated: 1,530 more rows]

[truncated: 28 more sheets: DN7, DT1, DT2, DT3, DT4, DT5, DT6, DT7, VN1, VN2, VN3, VN4, VN5, VN6, VN7, VT1, VT2, VT3, VT4, VT5 …]
